# Supplementary material for: Non-enzymatic pyridine ring formation in the biosynthesis of the rubrolone tropolone alkaloids
Source: PubMed Central journal article supplement (PMC5059770; doi:10.1038/ncomms13083), 2016-10-07
Supplement: ncomms13083-s1.pdf [file ncomms13083-s1.pdf]

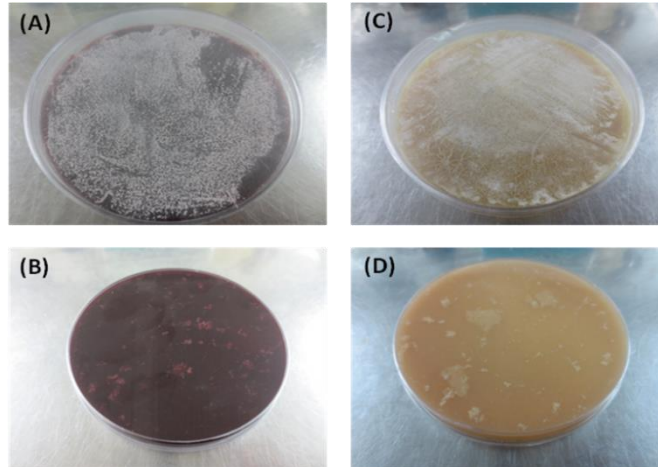

**Supplementary Figure 1.** The phenotype comparison of the engineered heterologous expression strains. (A) Front side of agar plate with strain *S. albus* 9B10; (B) Back side of agar plate with strain *S. albus* 9B10; (C) Front side of agar plate with strain *S. albus* pJTU2554; (D) Back side of agar plate with strain *S. albus* pJTU2554.

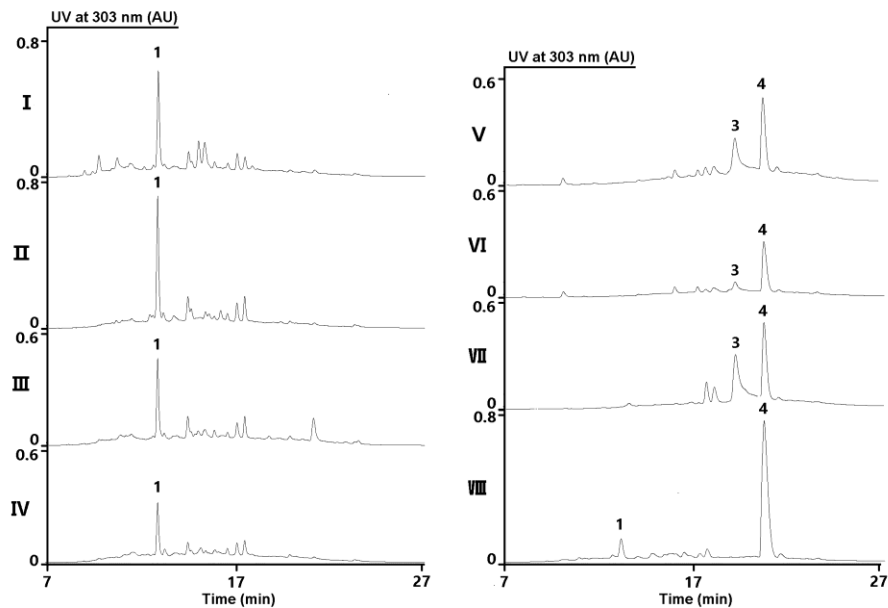

**Supplementary Figure 2.** HPLC profiles of the fermentation extracts of engineered heterologous expression strains. I: *S. albus* 9B10-1; II: *S. albus* 9B10-2; III: *S. albus* 9B10- $\Delta E7$ ; IV: *S. albus* 9B10- $\Delta A$ ; V: *S. albus* 9B10- $\Delta S2$ ; VI: *S. albus* 9B10- $\Delta S3$ ; VII: *S. albus* 9B10- $\Delta S7$ ; VIII: *S. albus* 9B10 with reduced nitrogen source (removing the ammonium acetate and decreasing the yeast extract to 1g/L in the fermentation medium).

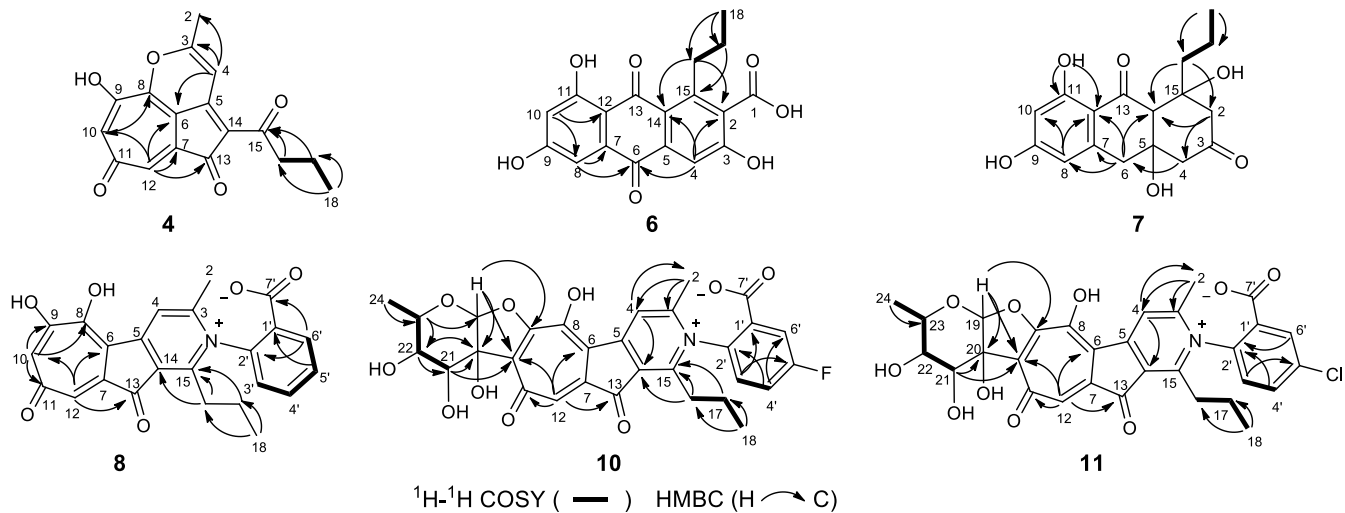

**Supplementary Figure 3.** Selected COSY and HMBC correlations for compounds **4**, **6-8**, and **10-11**.

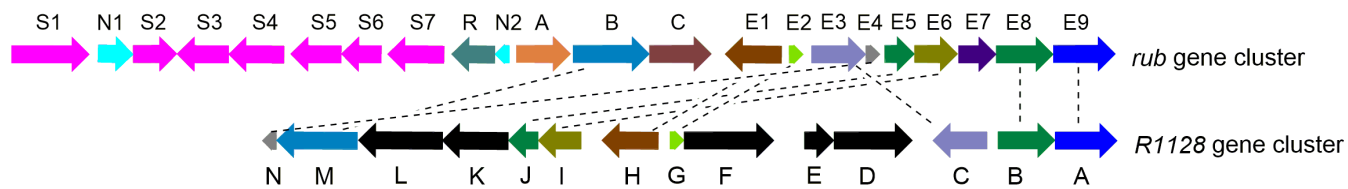

**Supplementary Figure 4.** Maps of the *rub* and *R1128* biosynthetic gene cluster.

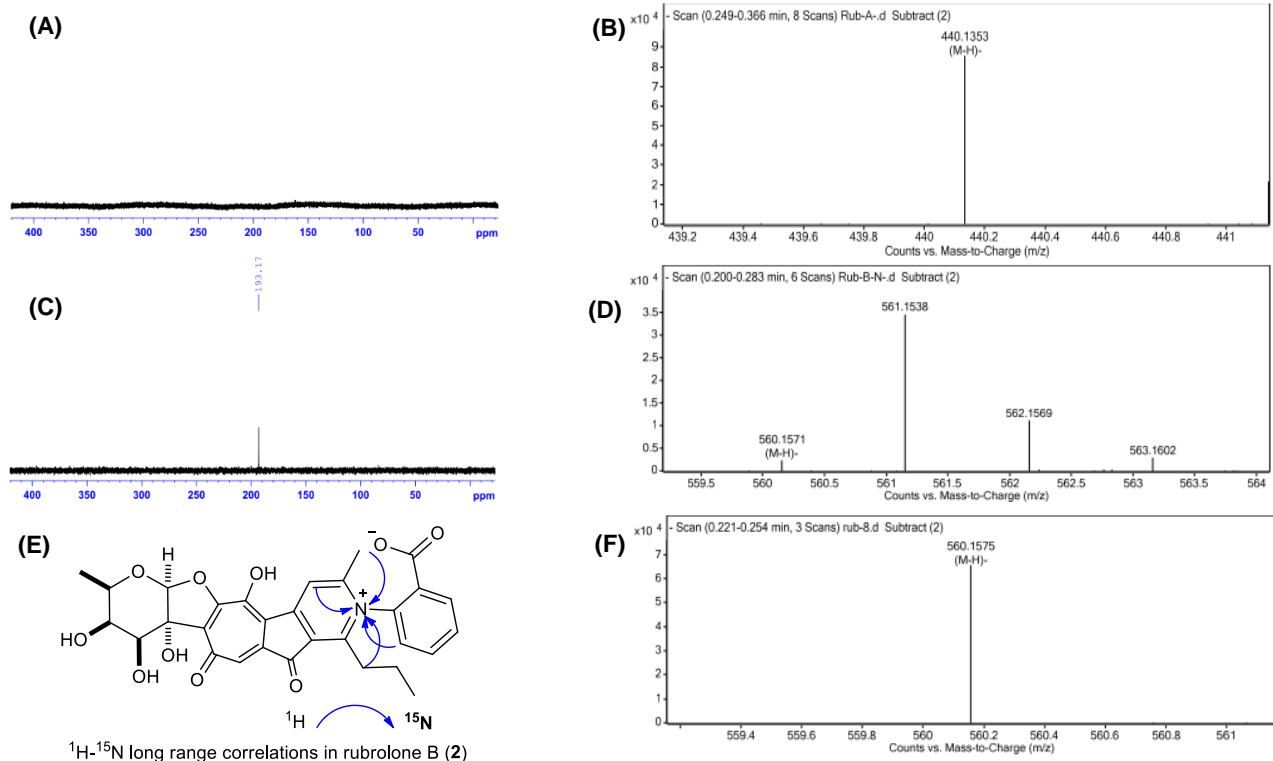

**Supplementary Figure 5.** MS and NMR data (measured in  $\text{DMSO-}d_6$ ) of **1** and **2** with or without  $^{15}\text{N}$ -labeled anthranilic acid feeding. (A)  $^{15}\text{N}$  NMR spectrum of **1** obtained after feeding with  $^{15}\text{N}$ -labeled anthranilic acid; (B) HRESIMS analysis of **1** obtained after feeding with  $^{15}\text{N}$ -labeled anthranilic acid; (C)  $^{15}\text{N}$  NMR spectrum of **2** obtained after feeding with  $^{15}\text{N}$ -labeled anthranilic acid; (D) HRESIMS analysis of **2** obtained after feeding with  $^{15}\text{N}$ -labeled anthranilic acid; (E)  $^1\text{H}$ - $^{15}\text{N}$  long range correlations of **2** obtained after feeding with  $^{15}\text{N}$ -labeled anthranilic acid; (F) HRESIMS analysis of **2** without feeding of  $^{15}\text{N}$ -labeled anthranilic acid.

### User Spectra

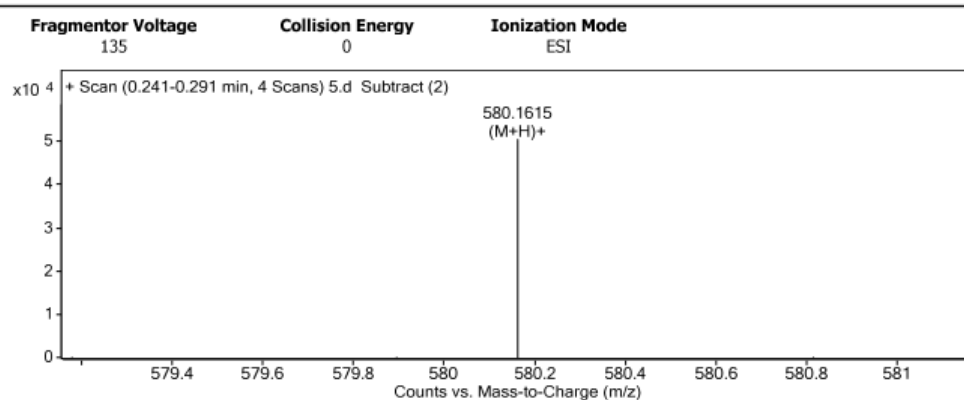

**Supplementary Figure 6.** HRESIMS analysis of compound **10**.

### User Spectra

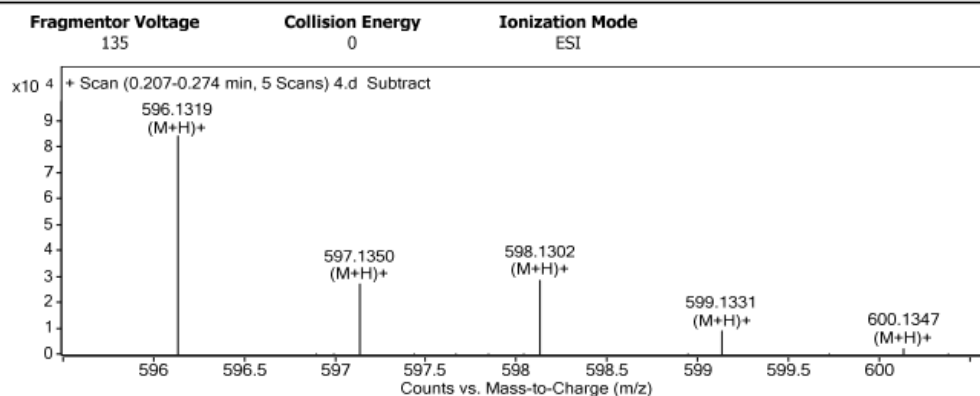

Supplementary Figure 7. HRESIMS analysis of compound 11.

### User Spectra

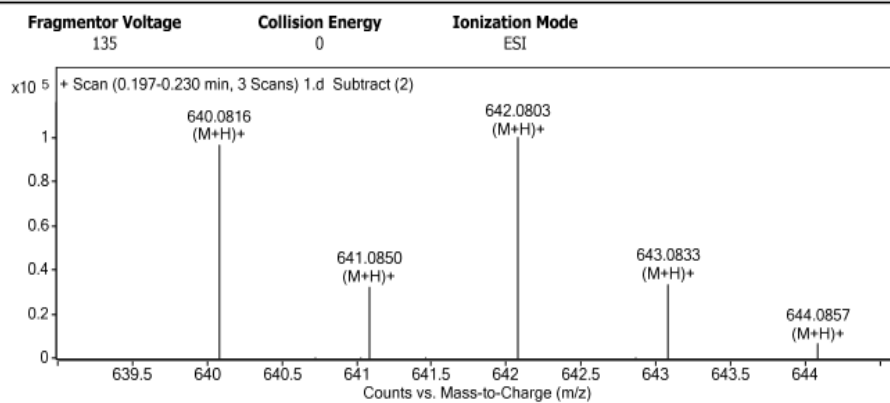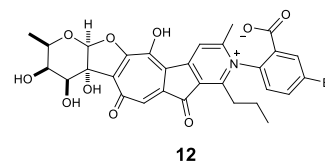

Supplementary Figure 8. HRESIMS analysis of compound 12.

### User Spectra

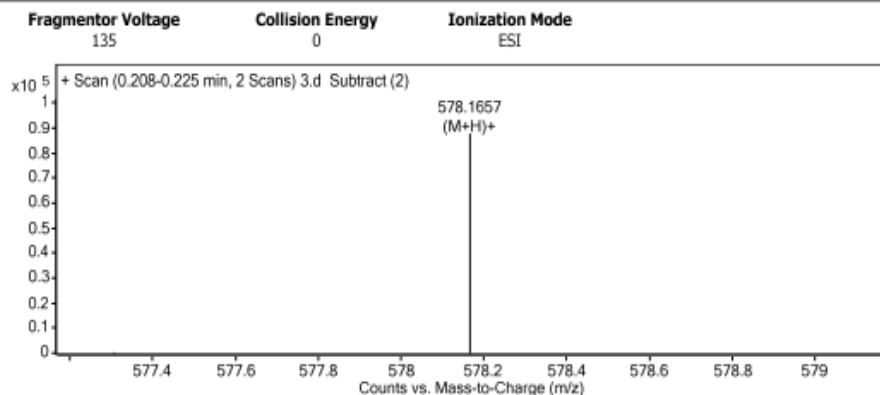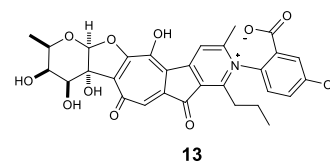

Supplementary Figure 9. HRESIMS analysis of compound 13.

### User Spectra

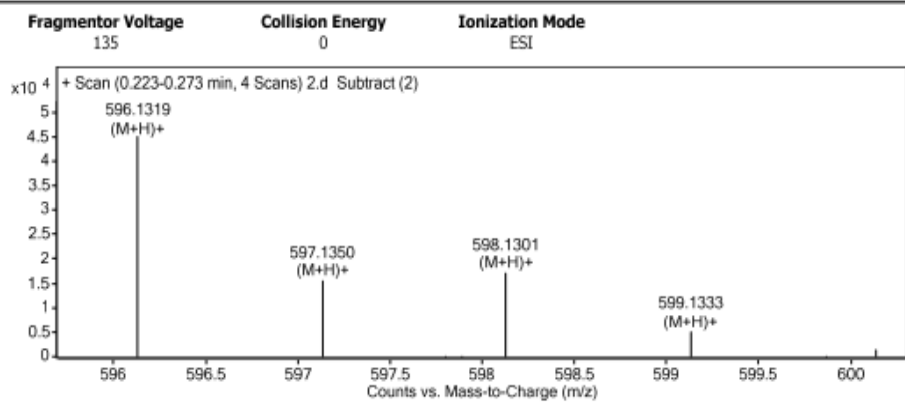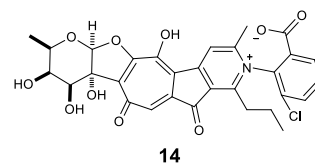

Supplementary Figure 10. HRESIMS analysis of compound 14.

### User Spectra

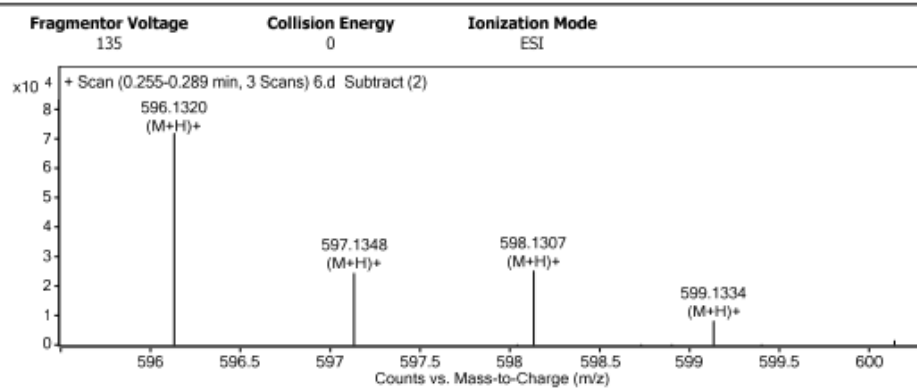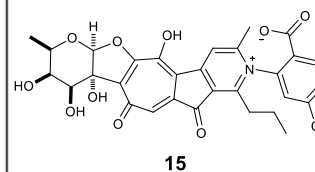

Supplementary Figure 11. HRESIMS analysis of compound 15.

### User Spectra

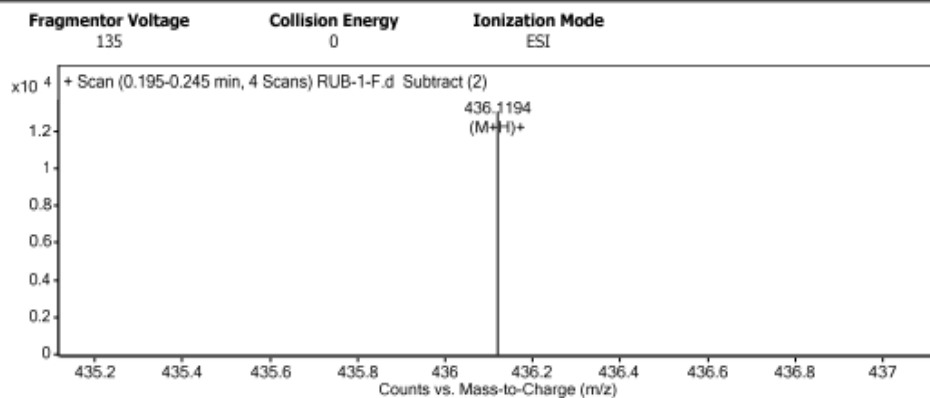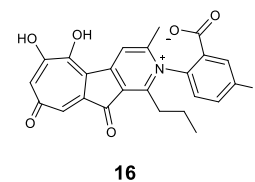

Supplementary Figure 12. HRESIMS analysis of compound 16.

## User Spectra

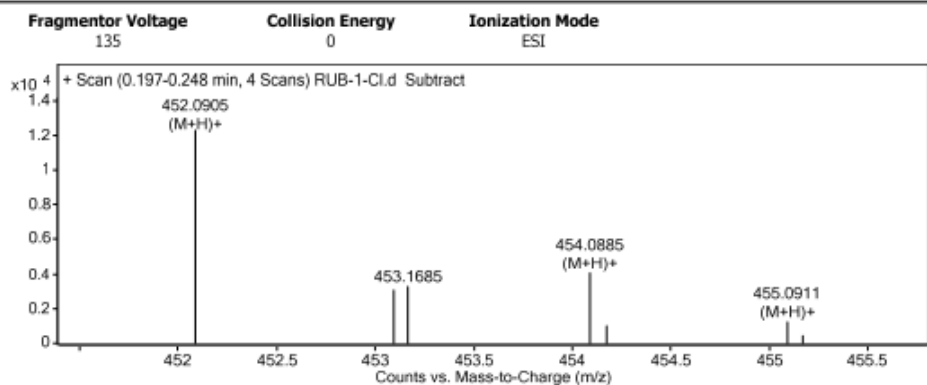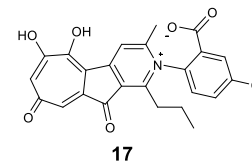

Supplementary Figure 13. HRESIMS analysis of compound 17.

## User Spectra

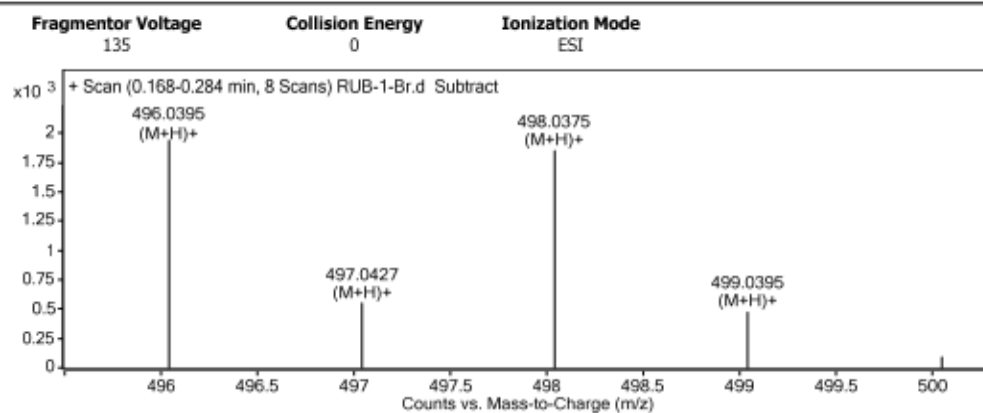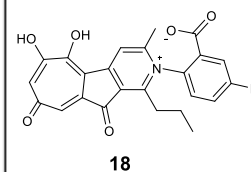

Supplementary Figure 14. HRESIMS analysis of compound 18.

## User Spectra

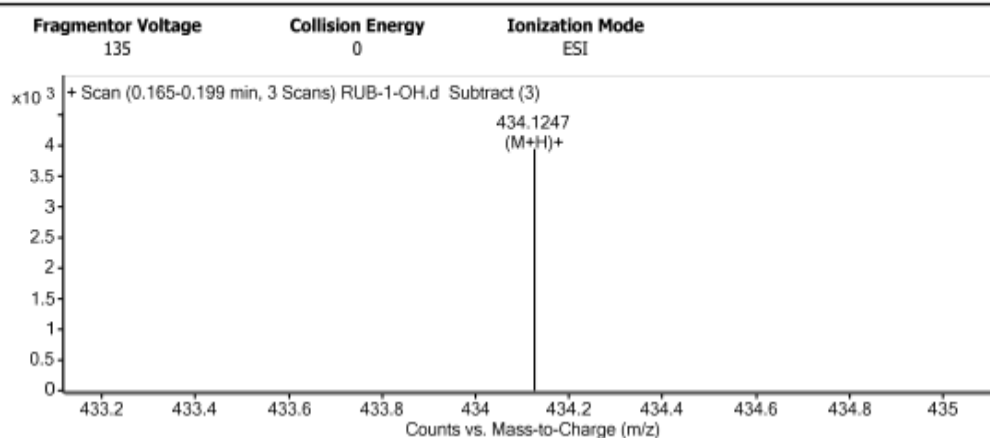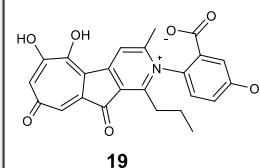

Supplementary Figure 15. HRESIMS analysis of compound 19.

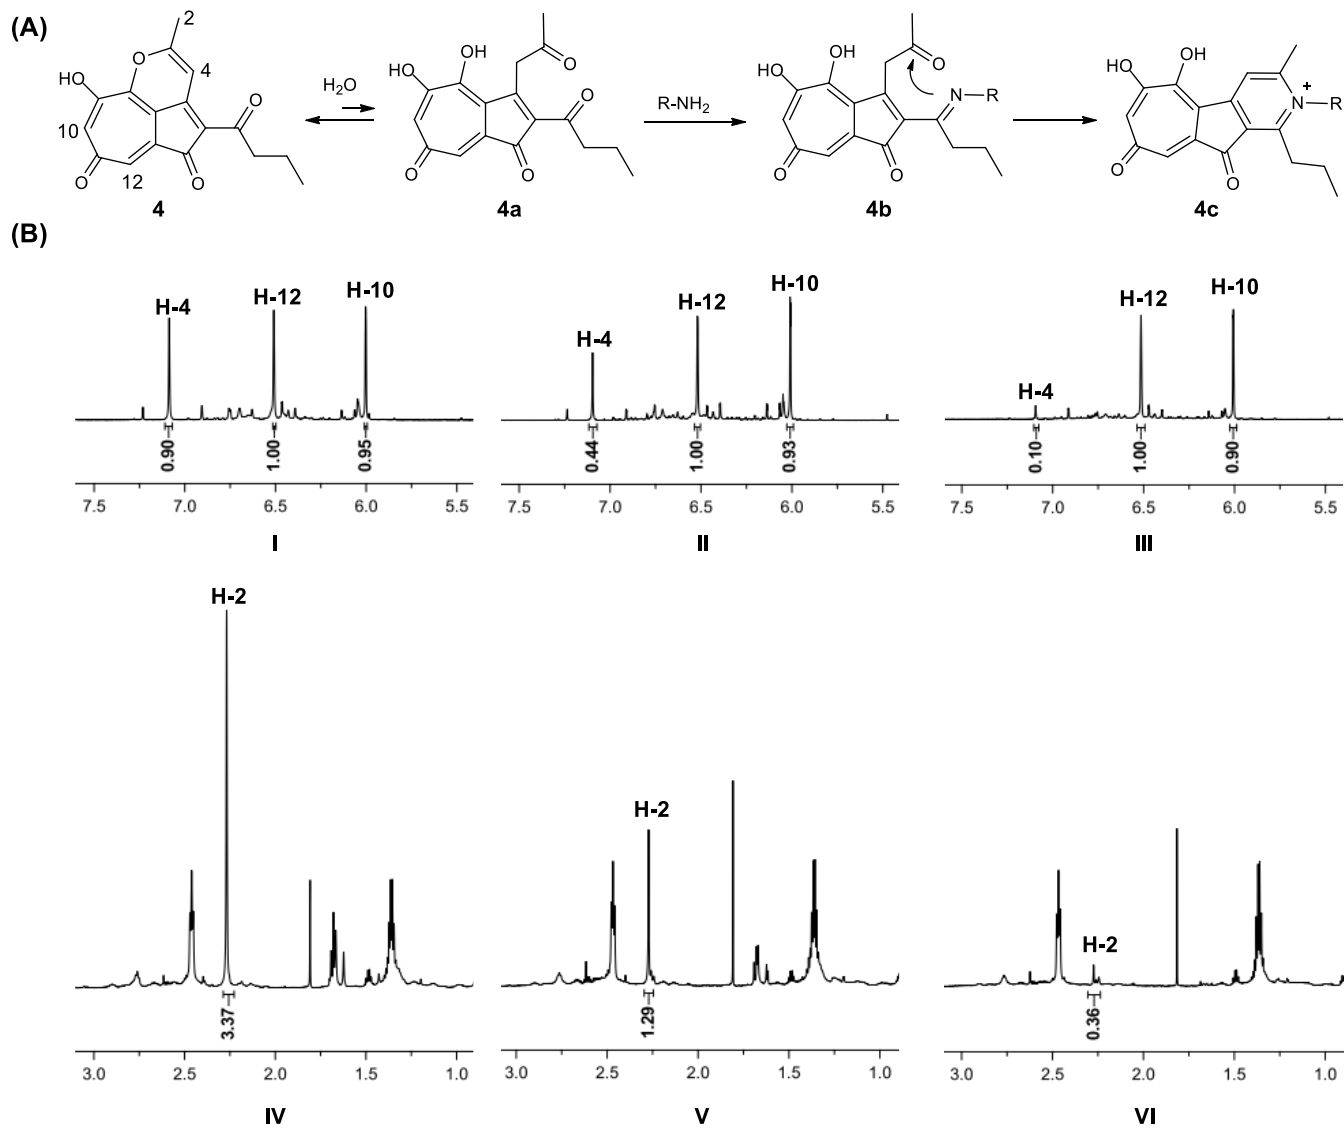

**Supplementary Figure 16.** (A) Proposed mechanism for the pyridyl moiety formation from intermediate **4**; (B) the enlarged  $^1\text{H}$  NMR spectra of **4** in  $\text{D}_2\text{O}$  after 5 minutes (spectra I and IV, left), 2 hours (spectra II and V, middle) and 4 hours (spectra III and VI, right) incubation.

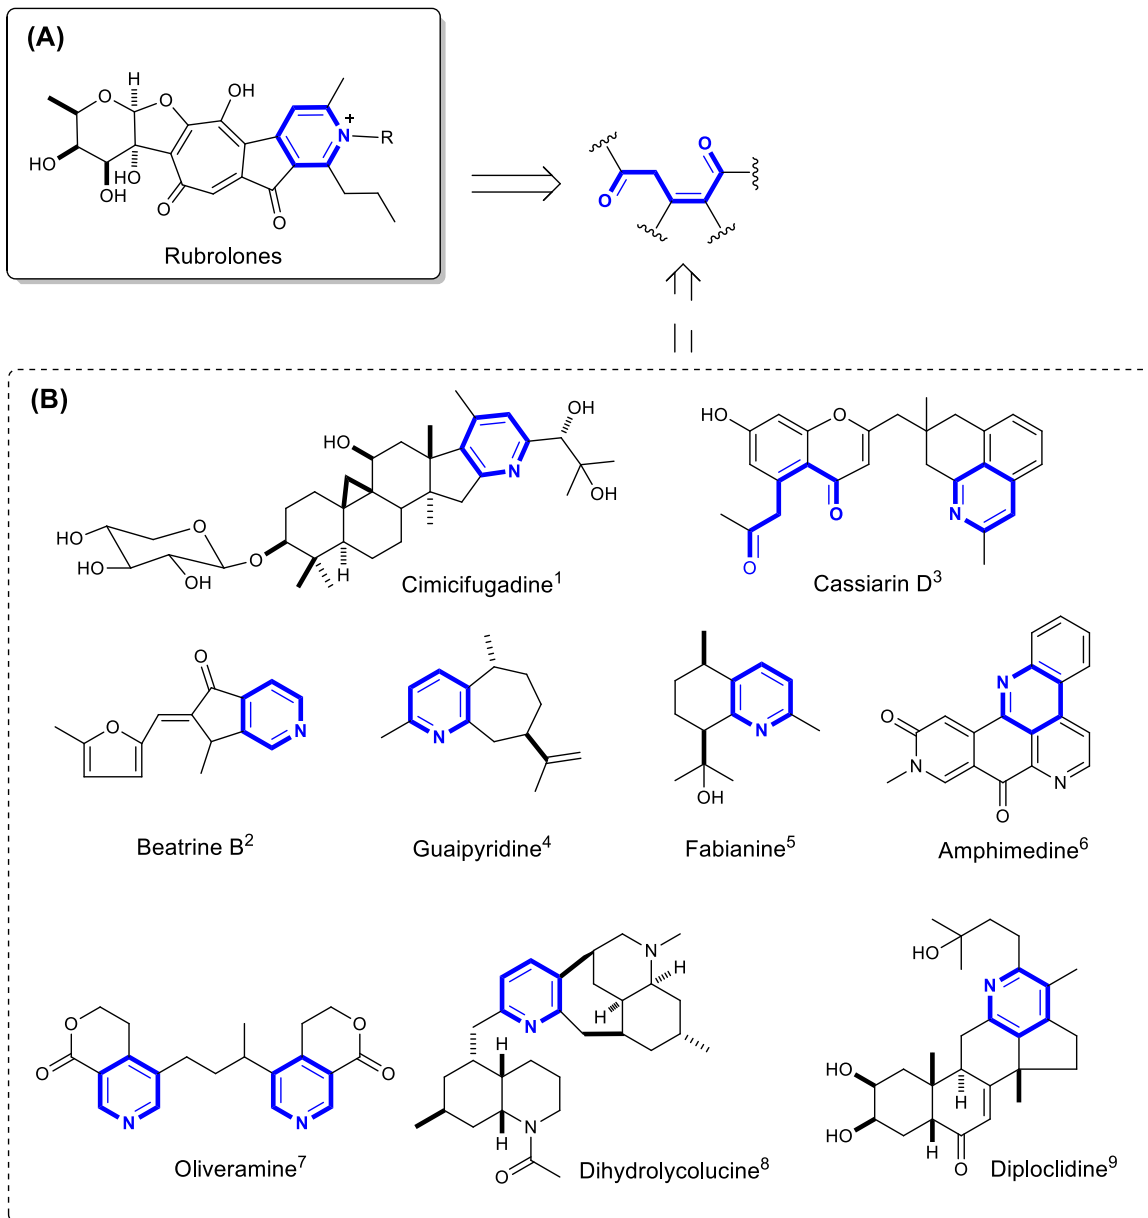

**Supplementary Figure 17.** The proposed central role of the reactive 1,5-dione moiety (blue) in accessing a diverse pyridine chemical universe including (A) rubrolones and (B) selected natural alkaloids for which are potentially involved in the non-enzymatical pyridine formation using the intermediacy of the 1,5-dione moiety.



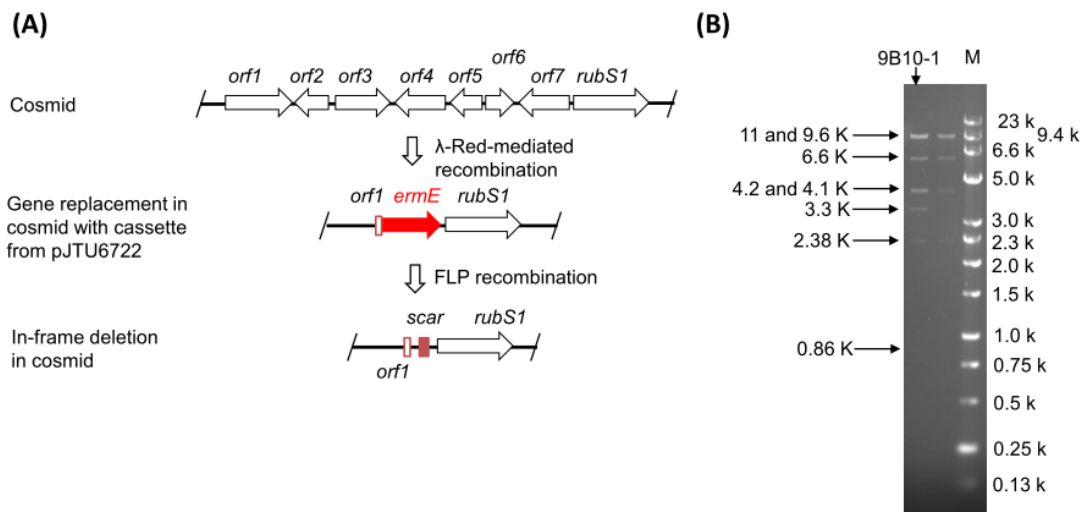

**Supplementary Figure 18.** Gene replacement of *orf1-7* using the PCR-targeting method. (A) Scheme for the construction of *orf1-7* replacement mutant. (B) Confirmation of plasmid p9B10-1 by restriction endonuclease BamHI. Lane M: DNA molecular ladder. Lane 9B10-1: Restriction fragments from the p9B10-1 (11259 bp, 9647 bp, 6601 bp, 4209 bp, 4123 bp, 3299 bp, 2376 bp, 858 bp, 20 bp).

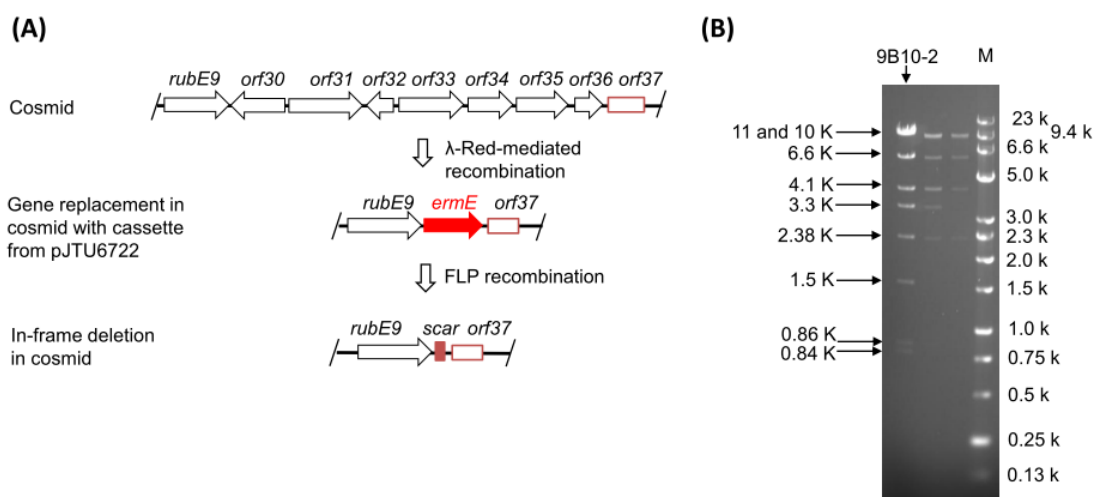

**Supplementary Figure 19.** Gene replacement of *orf30-37* using the PCR-targeting method. (A) Scheme for the construction of *orf30-37* replacement mutant. (B) Confirmation of plasmid p9B10-2 by restriction endonuclease BamHI. Lane M: DNA molecular ladder. Lane 9B10-2: Restriction fragments from the p9B10-2 (11259 bp, 10062 bp, 6601 bp, 4123 bp, 3299 bp, 2376 bp, 1473 bp, 858 bp, 844 bp, 37 bp).

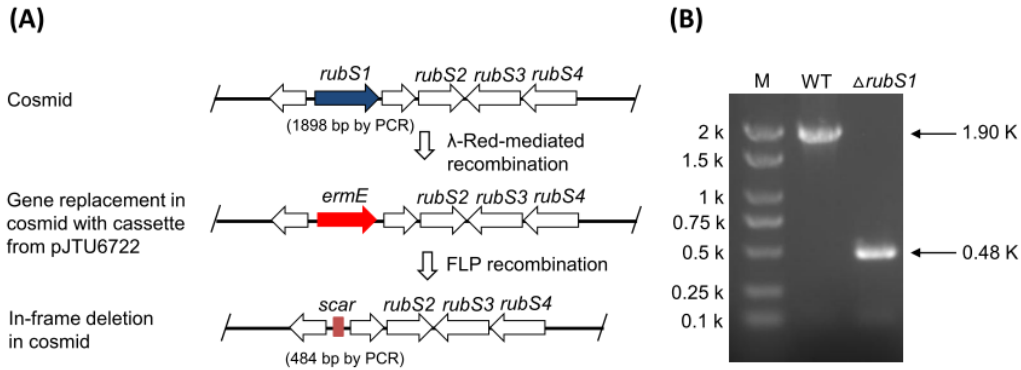

**Supplementary Figure 20.** Gene replacement of *rubS1* using the PCR-targeting method. (A) Scheme for the construction of *rubS1* replacement mutant. (B) Confirmation of mutant by PCR using the primers listed in supplementary Table 6. Lane M: DNA molecular ladder. Lane WT, PCR product from the *S. albus* 9B10. Lane  $\Delta rubS1$ , PCR product from *S. albus* 9B10- $\Delta S1$  mutant.

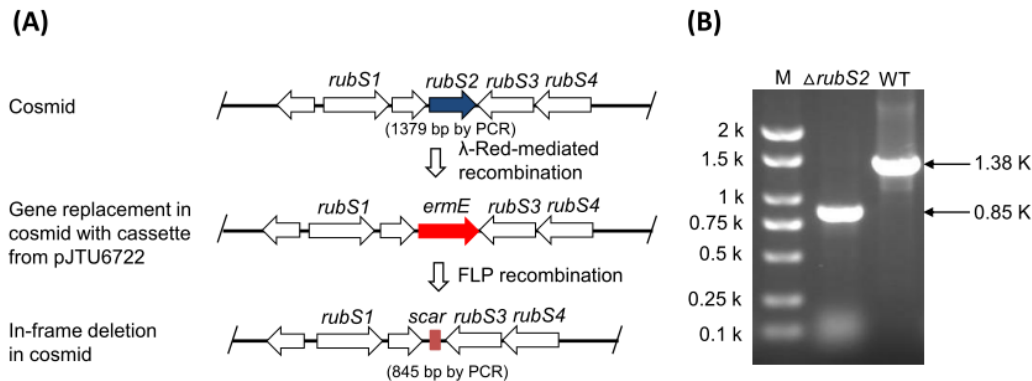

**Supplementary Figure 21.** Gene replacement of *rubS2* using the PCR-targeting method. (A) Scheme for the construction of *rubS2* replacement mutant. (B) Confirmation of mutant by PCR using the primers listed in supplementary Table 6. Lane M: DNA molecular ladder. Lane WT, PCR product from the *S. albus* 9B10. Lane  $\Delta rubS2$ , PCR product from *S. albus* 9B10- $\Delta S2$  mutant.

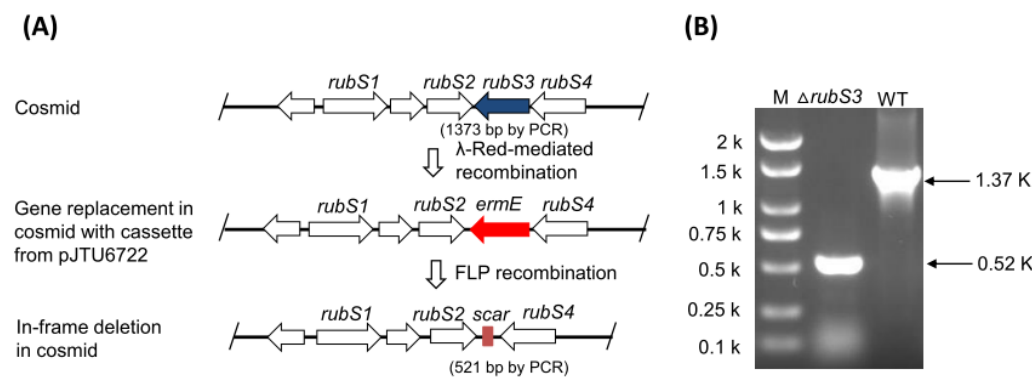

**Supplementary Figure 22.** Gene replacement of *rubS3* using the PCR-targeting method. (A) Scheme for the construction of *rubS3* replacement mutant. (B) Confirmation of mutant by PCR using the primers listed in supplementary Table 6. Lane M: DNA molecular ladder. Lane WT, PCR product from the *S. albus* 9B10. Lane  $\Delta rubS3$ , PCR product from *S. albus* 9B10- $\Delta S3$  mutant.

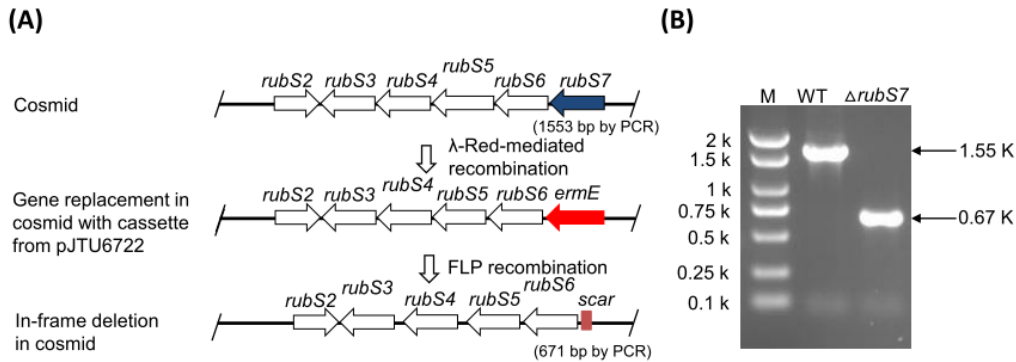

**Supplementary Figure 23.** Gene replacement of *rubS7* using the PCR-targeting method. (A) Scheme for the construction of *rubS7* replacement mutant. (B) Confirmation of mutant by PCR using the primers listed in supplementary Table 6. Lane M: DNA molecular ladder. Lane WT, PCR product from the *S. albus* 9B10. Lane  $\Delta rubS7$ , PCR product from *S. albus* 9B10- $\Delta S7$  mutant.

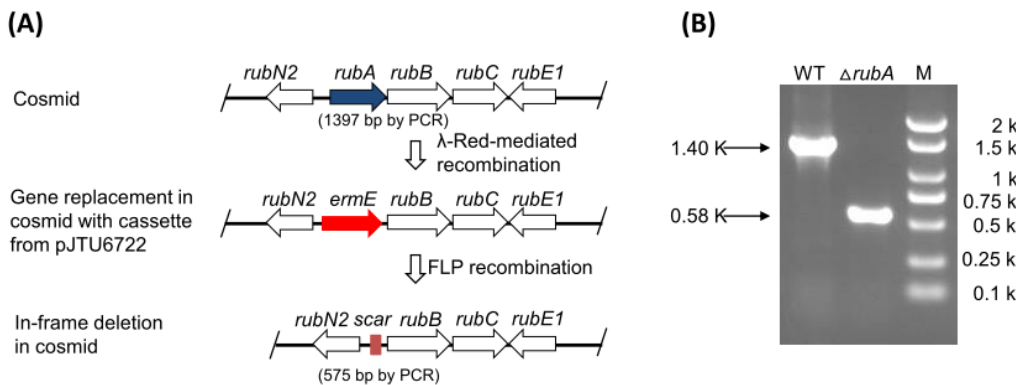

**Supplementary Figure 24.** Gene replacement of *rubA* using the PCR-targeting method. (A) Scheme for the construction of *rubA* replacement mutant. (B) Confirmation of mutant by PCR using the primers listed in supplementary Table 6. Lane M: DNA molecular ladder. Lane WT, PCR product from the *S. albus* 9B10. Lane  $\Delta rubA$ , PCR product from *S. albus* 9B10- $\Delta A$  mutant.

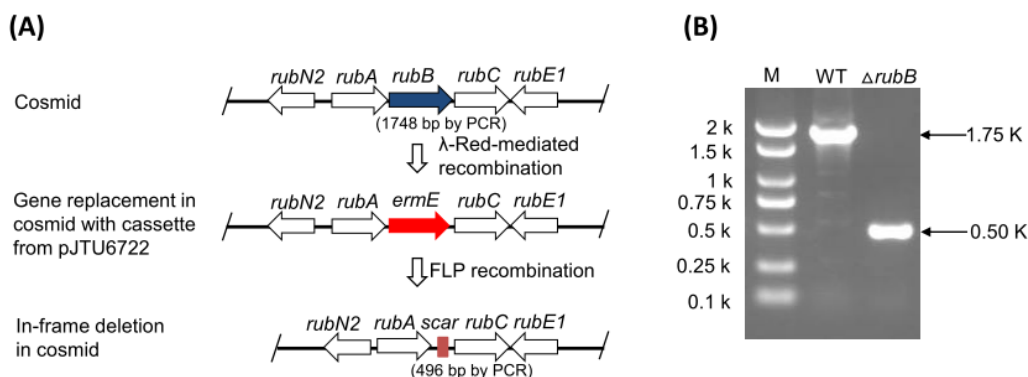

**Supplementary Figure 25.** Gene replacement of *rubB* using the PCR-targeting method. (A) Scheme for the construction of *rubB* replacement mutant. (B) Confirmation of mutant by PCR using the primers listed in supplementary Table 6. Lane M: DNA molecular ladder. Lane WT, PCR product from the *S. albus* 9B10. Lane  $\Delta rubB$ , PCR product from *S. albus* 9B10- $\Delta B$  mutant.

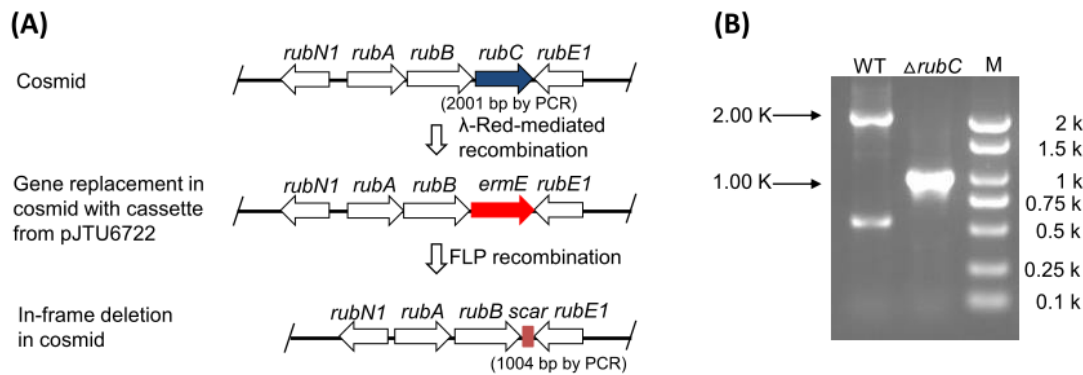

**Supplementary Figure 26.** Gene replacement of *rubC* using the PCR-targeting method. (A) Scheme for the construction of *rubC* replacement mutant. (B) Confirmation of mutant by PCR using the primers listed in supplementary Table 6. Lane M: DNA molecular ladder. Lane WT, PCR product from the *S. albus* 9B10. Lane  $\Delta rubC$ , PCR product from *S. albus* 9B10- $\Delta C$  mutant.

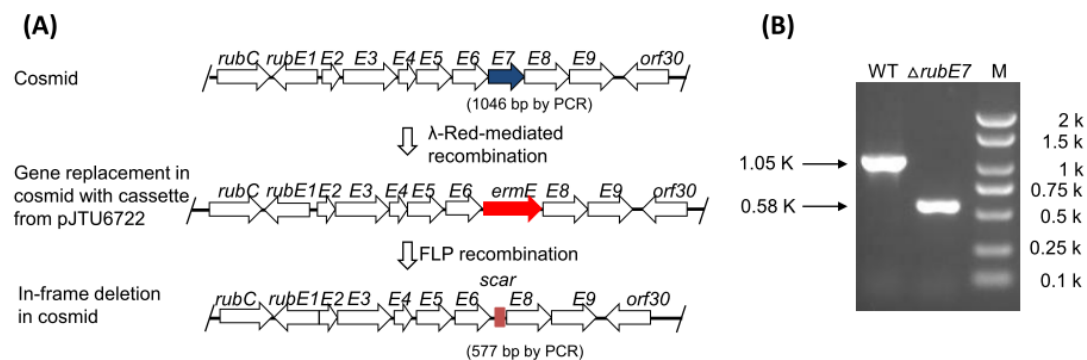

**Supplementary Figure 27.** Gene replacement of *rubE7* using the PCR-targeting method. (A) Scheme for the construction of *rubE7* replacement mutant. (B) Confirmation of mutant by PCR using the primers listed in supplementary Table 6. Lane M: DNA molecular ladder. Lane WT, PCR product from the *S. albus* 9B10. Lane  $\Delta rubE7$ , PCR product from *S. albus* 9B10- $\Delta E7$  mutant.

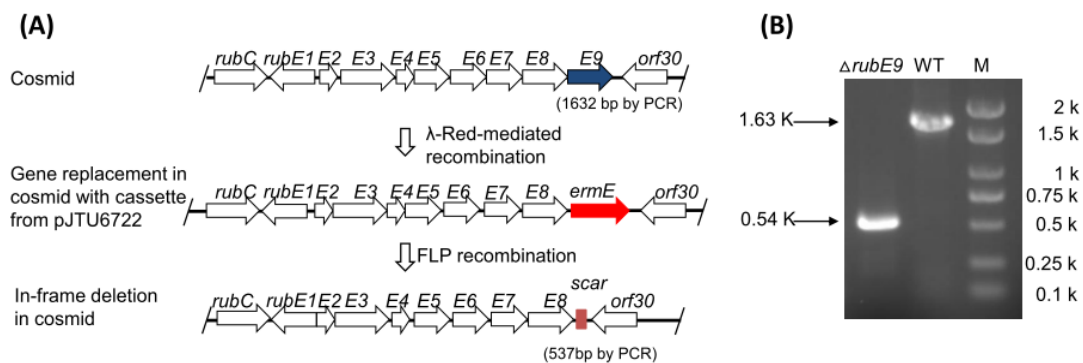

**Supplementary Figure 28.** Gene replacement of *rubE9* using the PCR-targeting method. (A) Scheme for the construction of *rubE9* replacement mutant. (B) Confirmation of mutant by PCR using the primers listed in supplementary Table 6. Lane M: DNA molecular ladder. Lane WT, PCR product from the *S. albus* 9B10. Lane  $\Delta rubE9$ , PCR product from *S. albus* 9B10- $\Delta E9$  mutant.

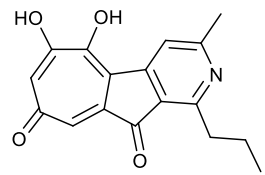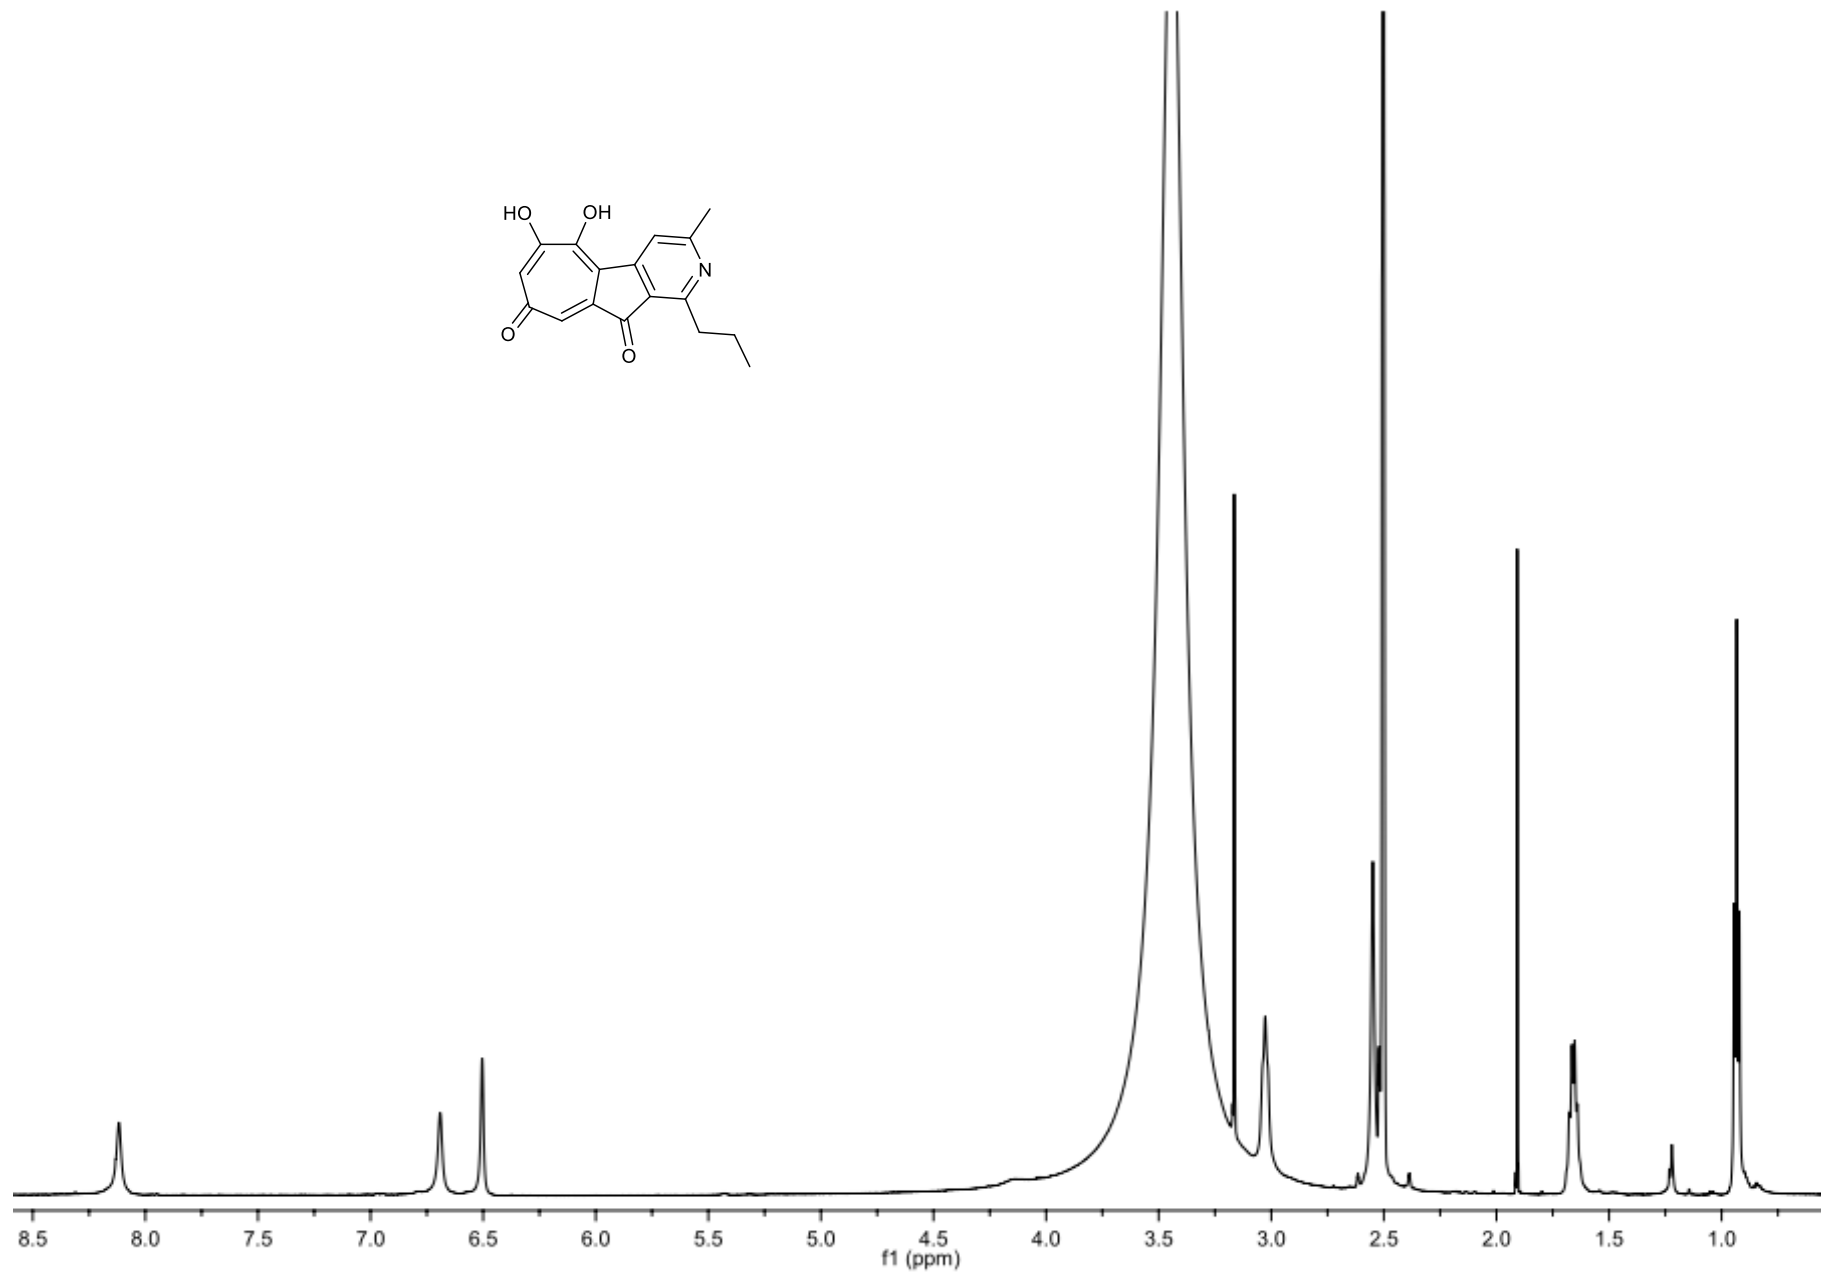

**Supplementary Figure 29.** <sup>1</sup>H NMR spectrum of compound **3** in DMSO-*d*<sub>6</sub>.

# User Spectra

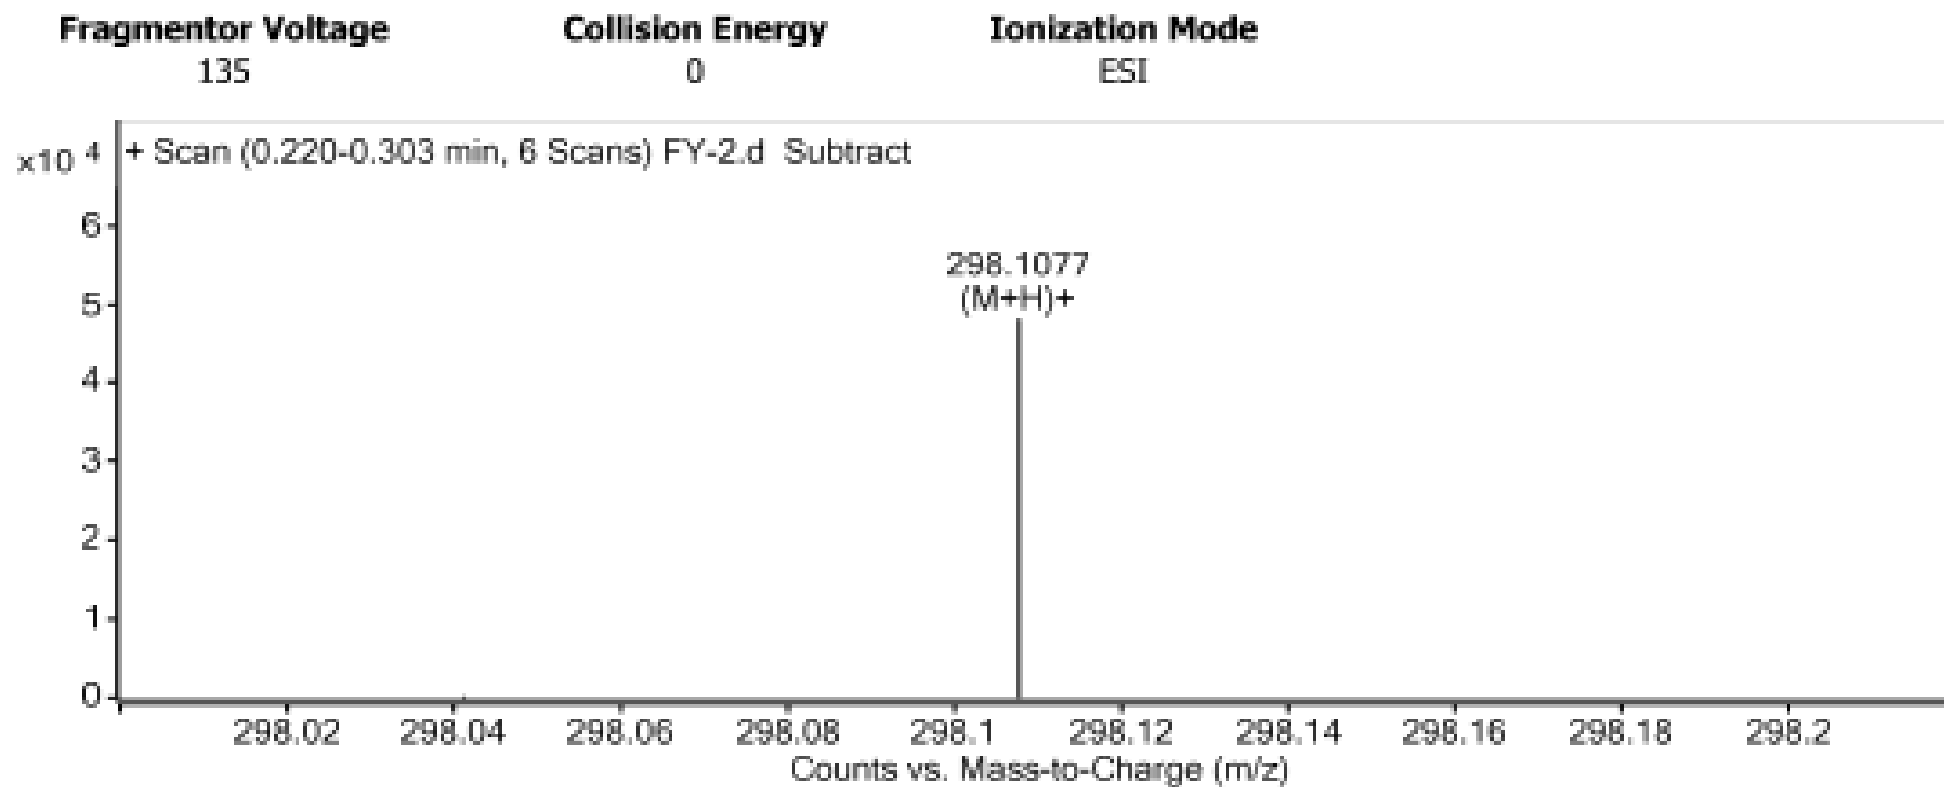

Supplementary Figure 30. HRESIMS analysis of compound 3.

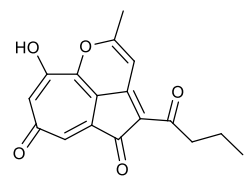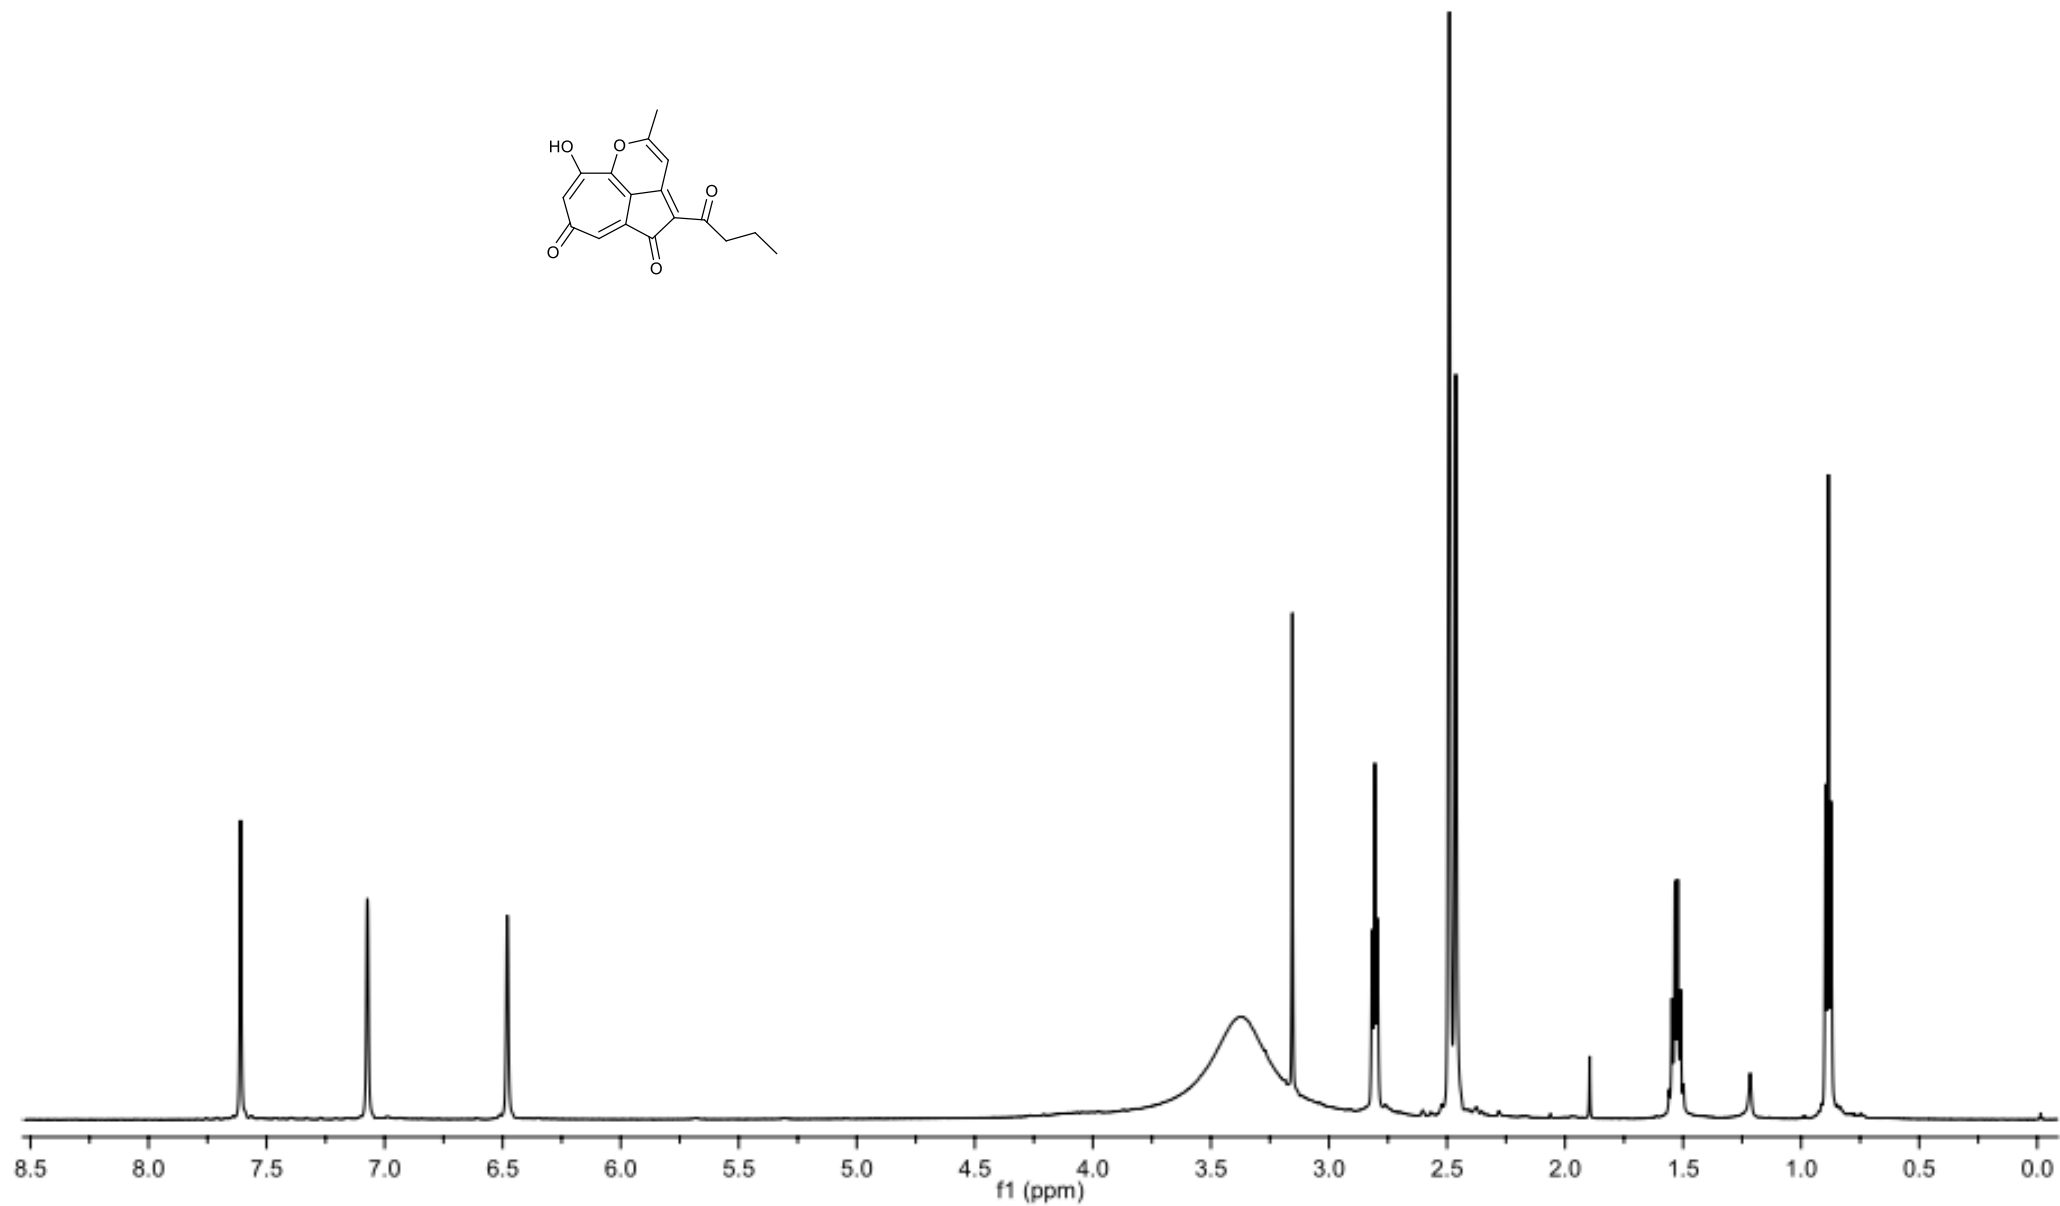

**Supplementary Figure 31.** <sup>1</sup>H NMR spectrum of compound **4** in DMSO-*d*<sub>6</sub>.

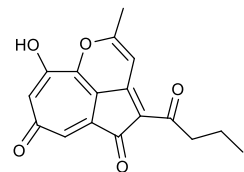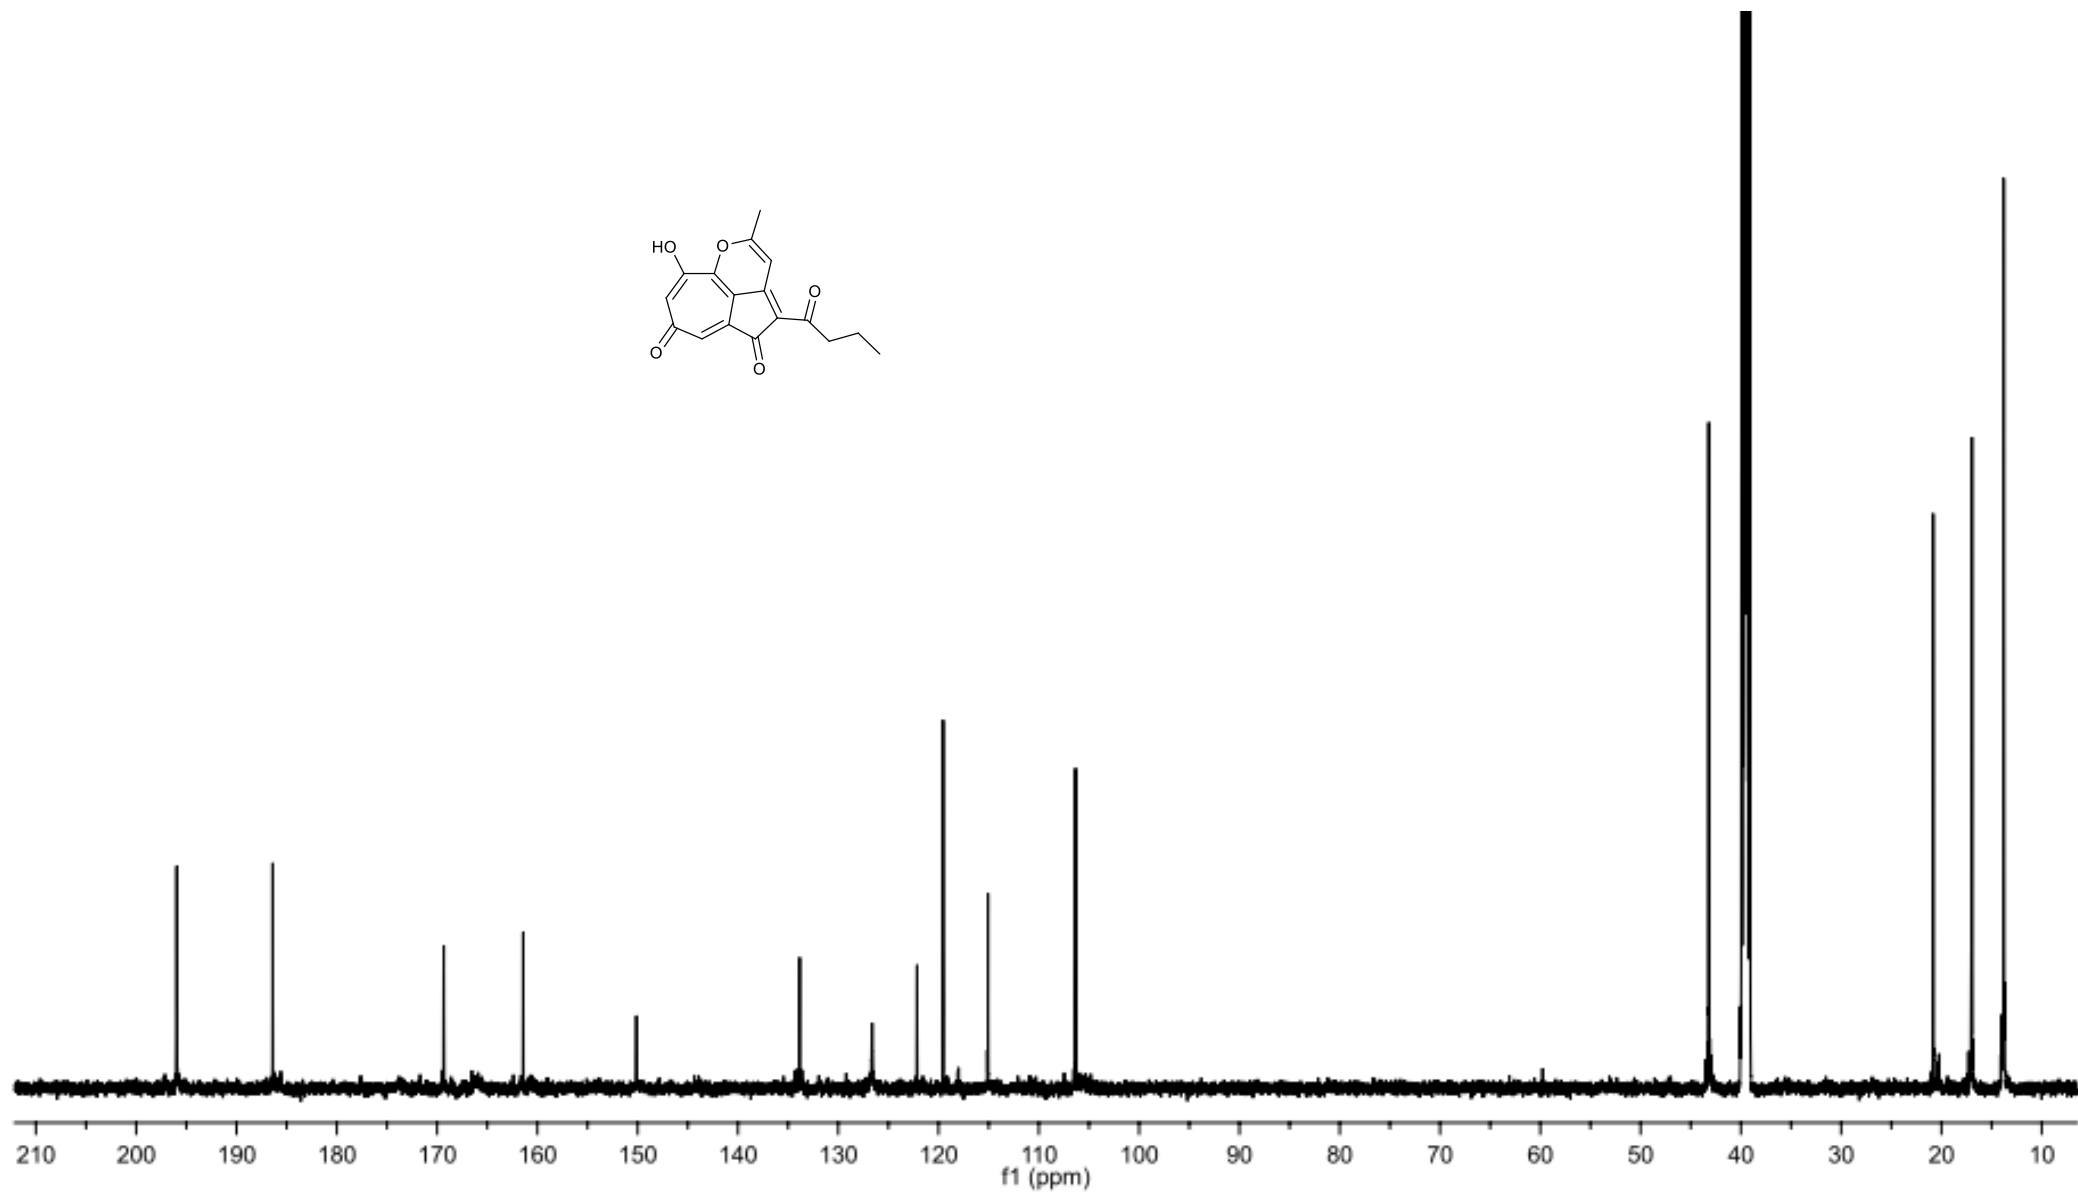

Supplementary Figure 32.  $^{13}\text{C}$  NMR spectrum of compound 4 in  $\text{DMSO-}d_6$ .



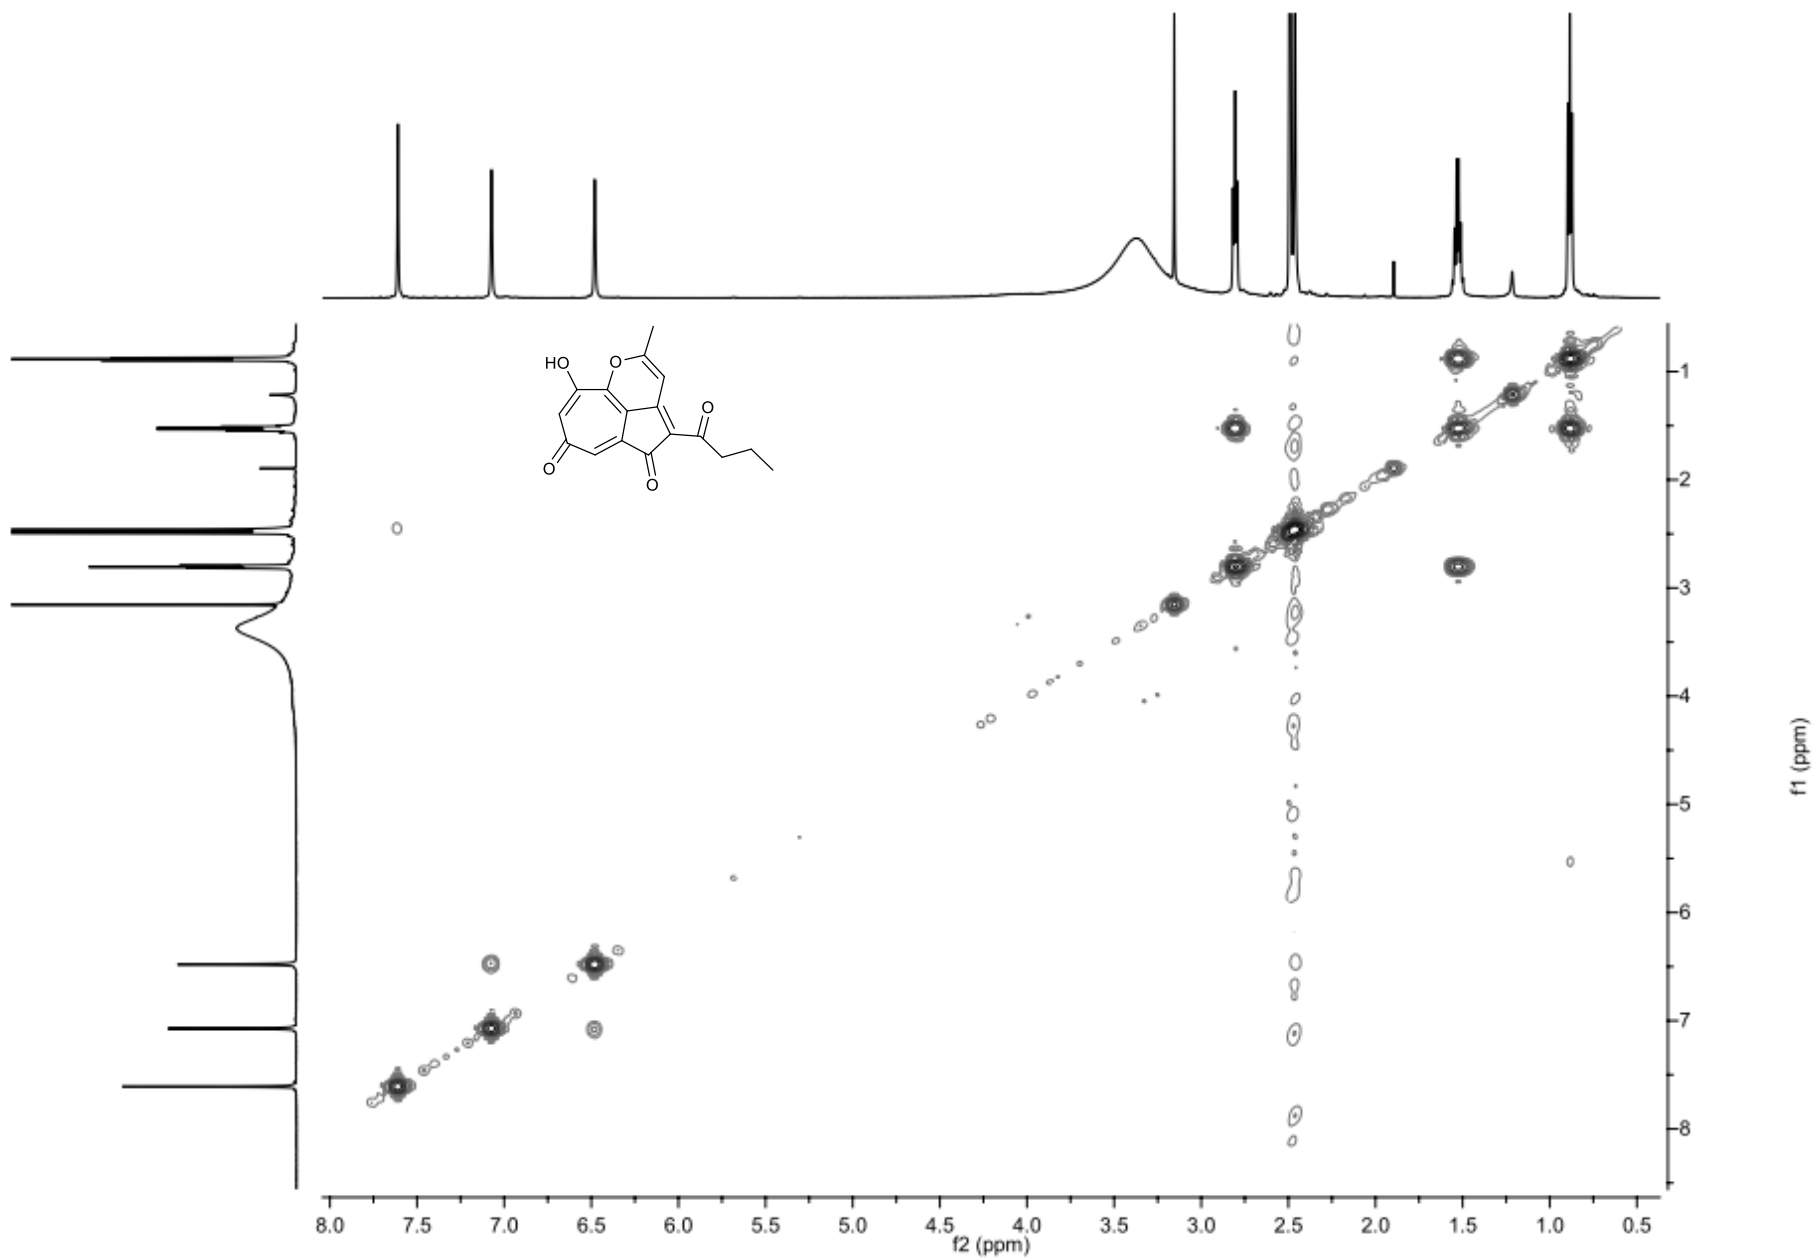

Supplementary Figure 33.  $^1\text{H}$ - $^1\text{H}$  COSY NMR spectrum of compound 4 in  $\text{DMSO}-d_6$ .

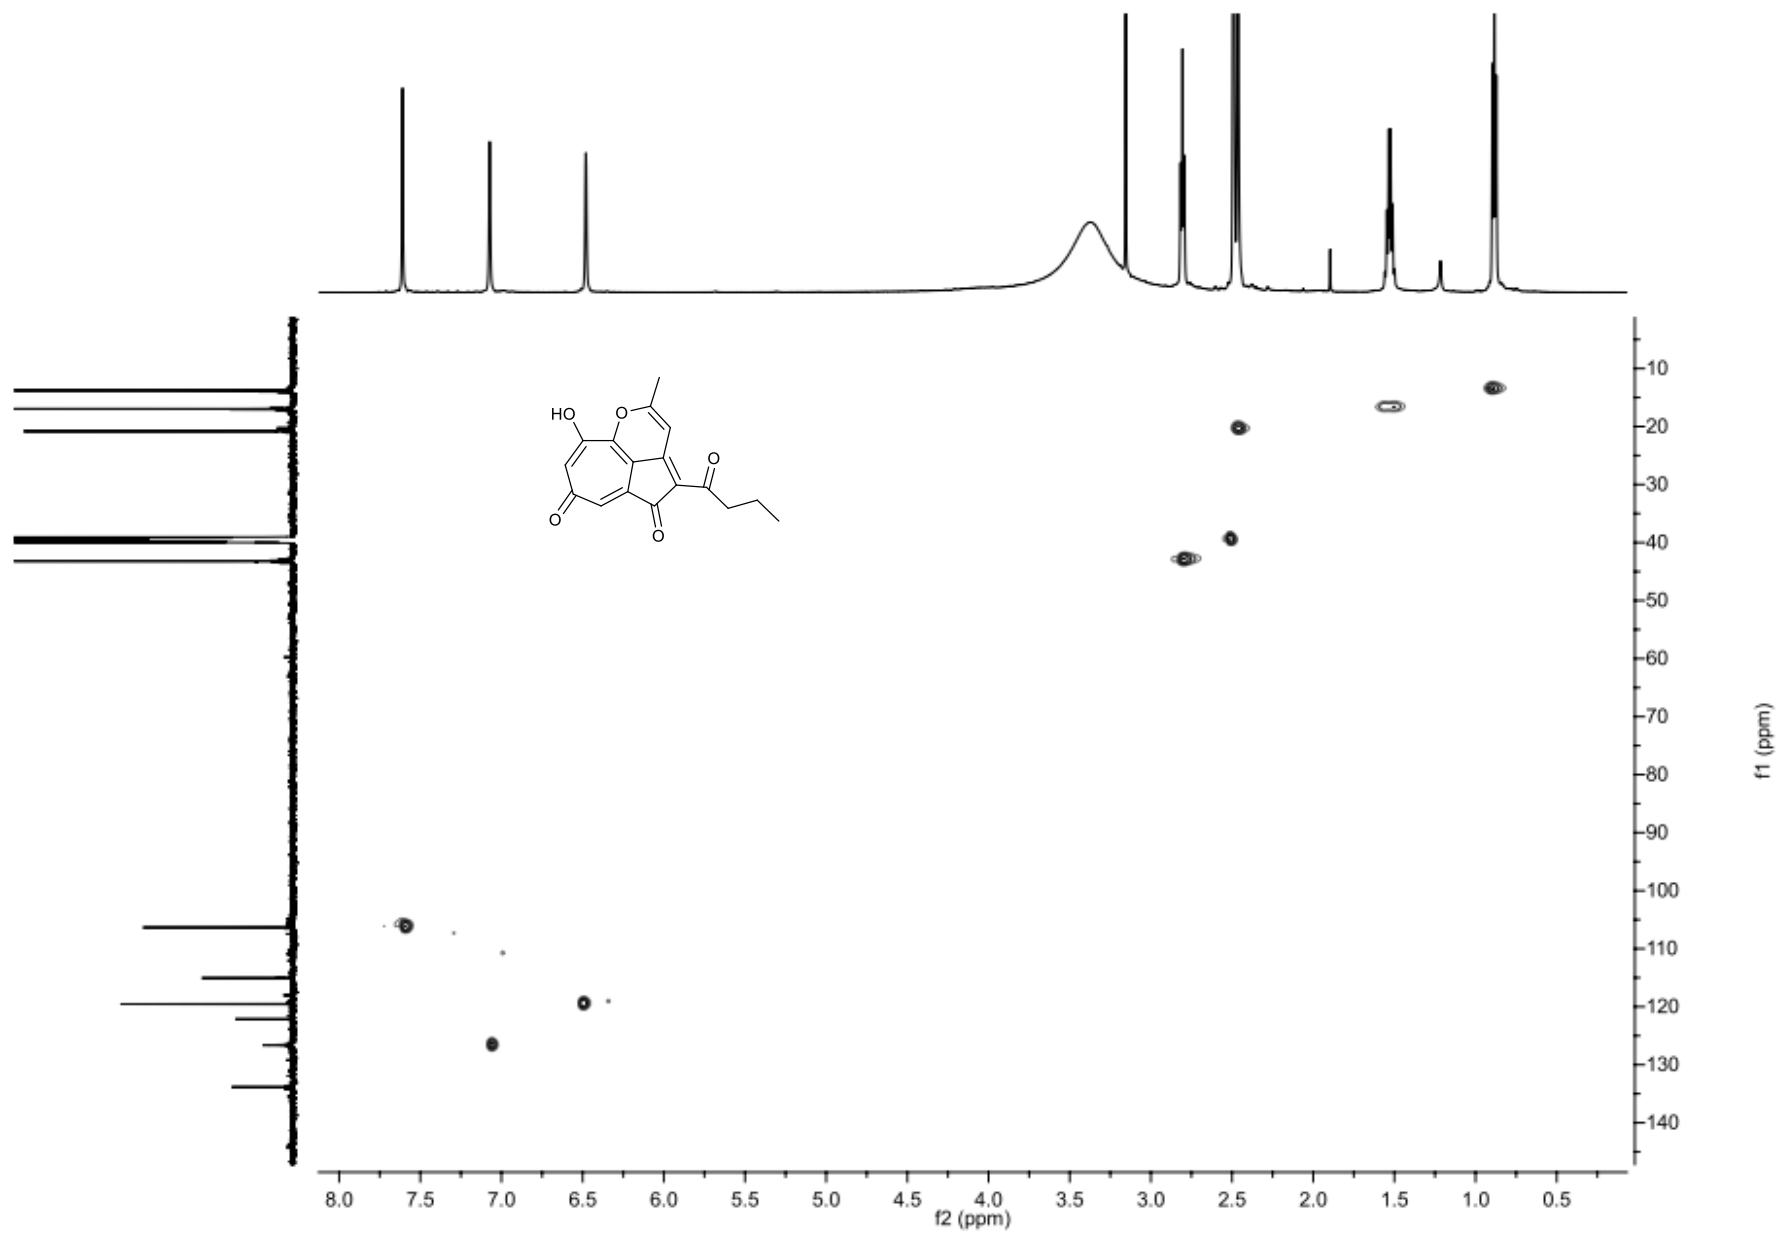

Supplementary Figure 34. HSQC NMR spectrum of compound 4 in DMSO-*d*<sub>6</sub>.

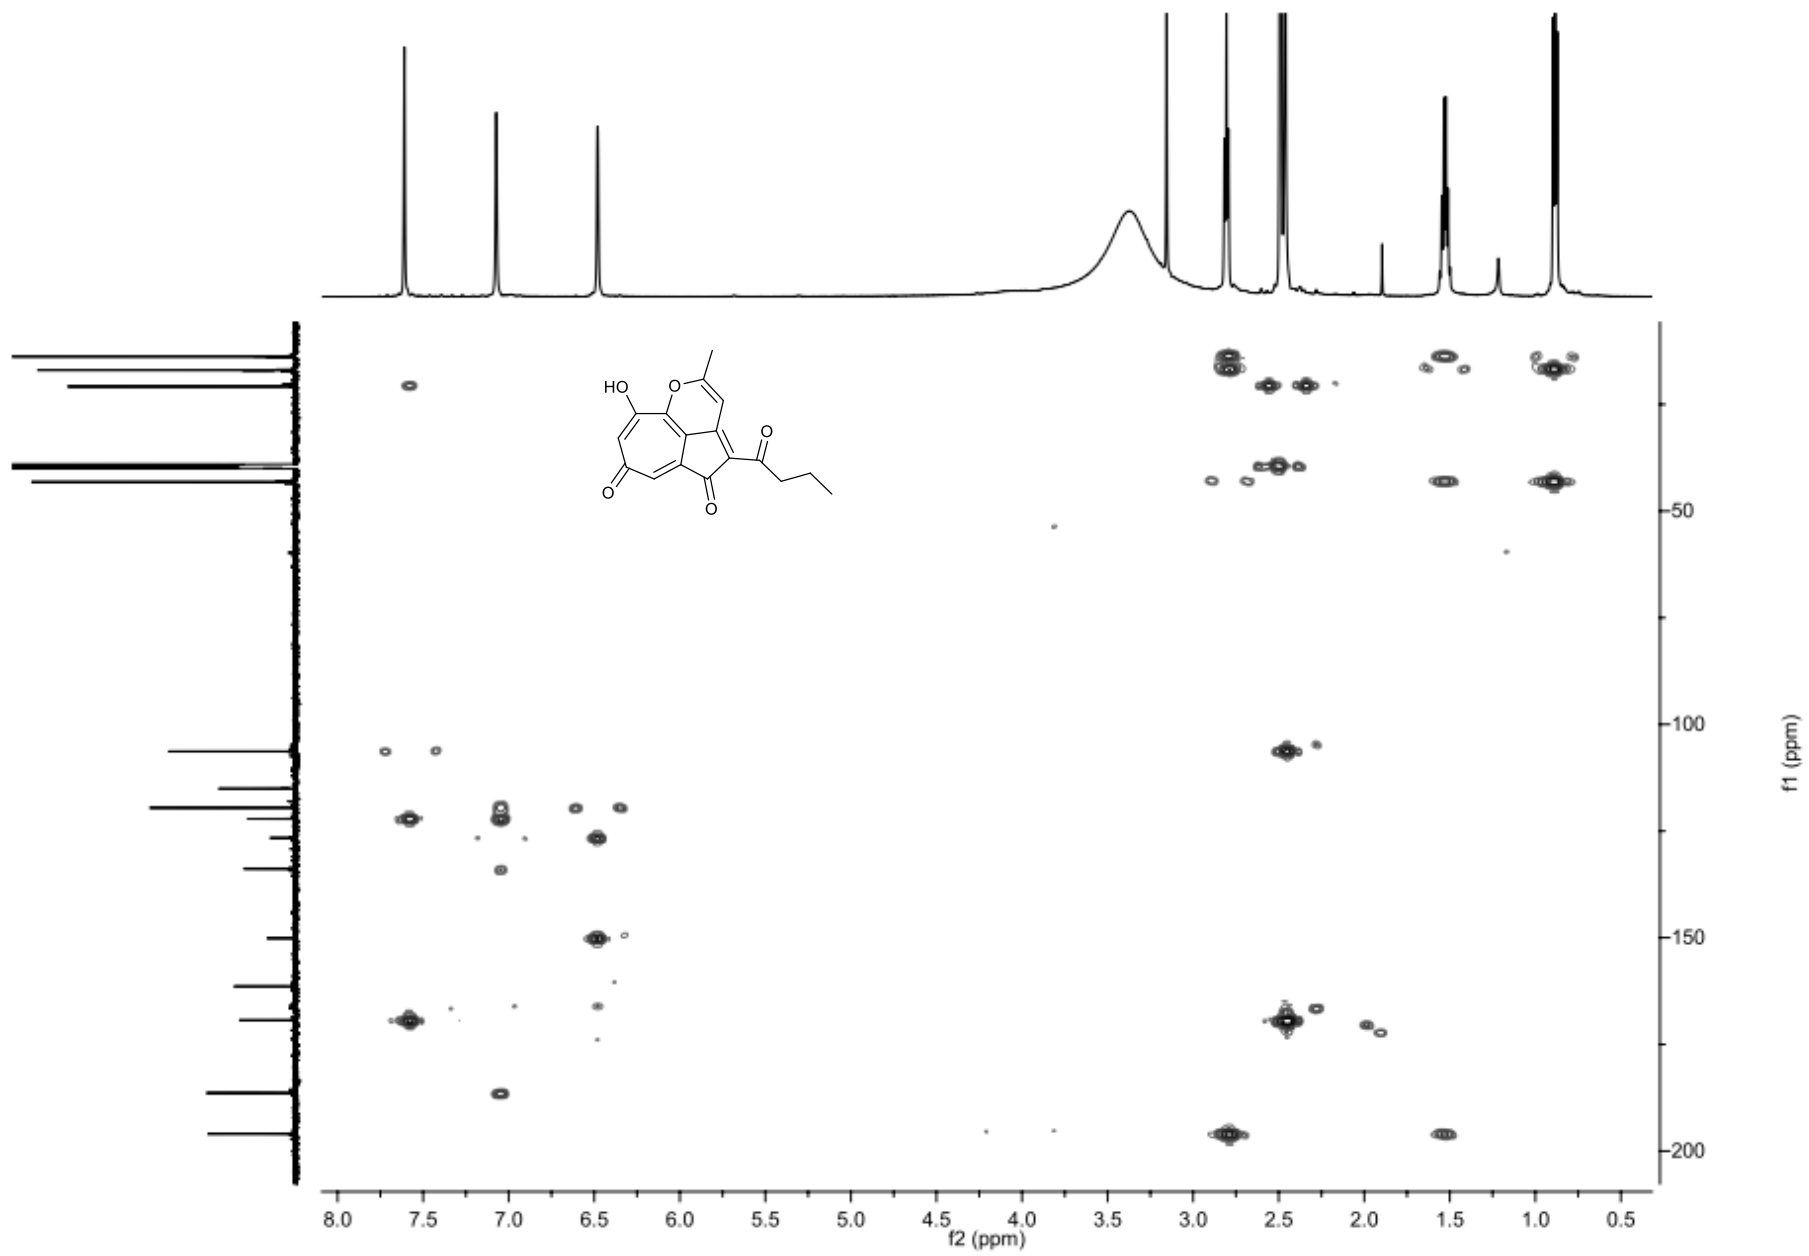

Supplementary Figure 35. HMBC NMR spectrum of compound 4 in DMSO-*d*<sub>6</sub>.

## User Spectra

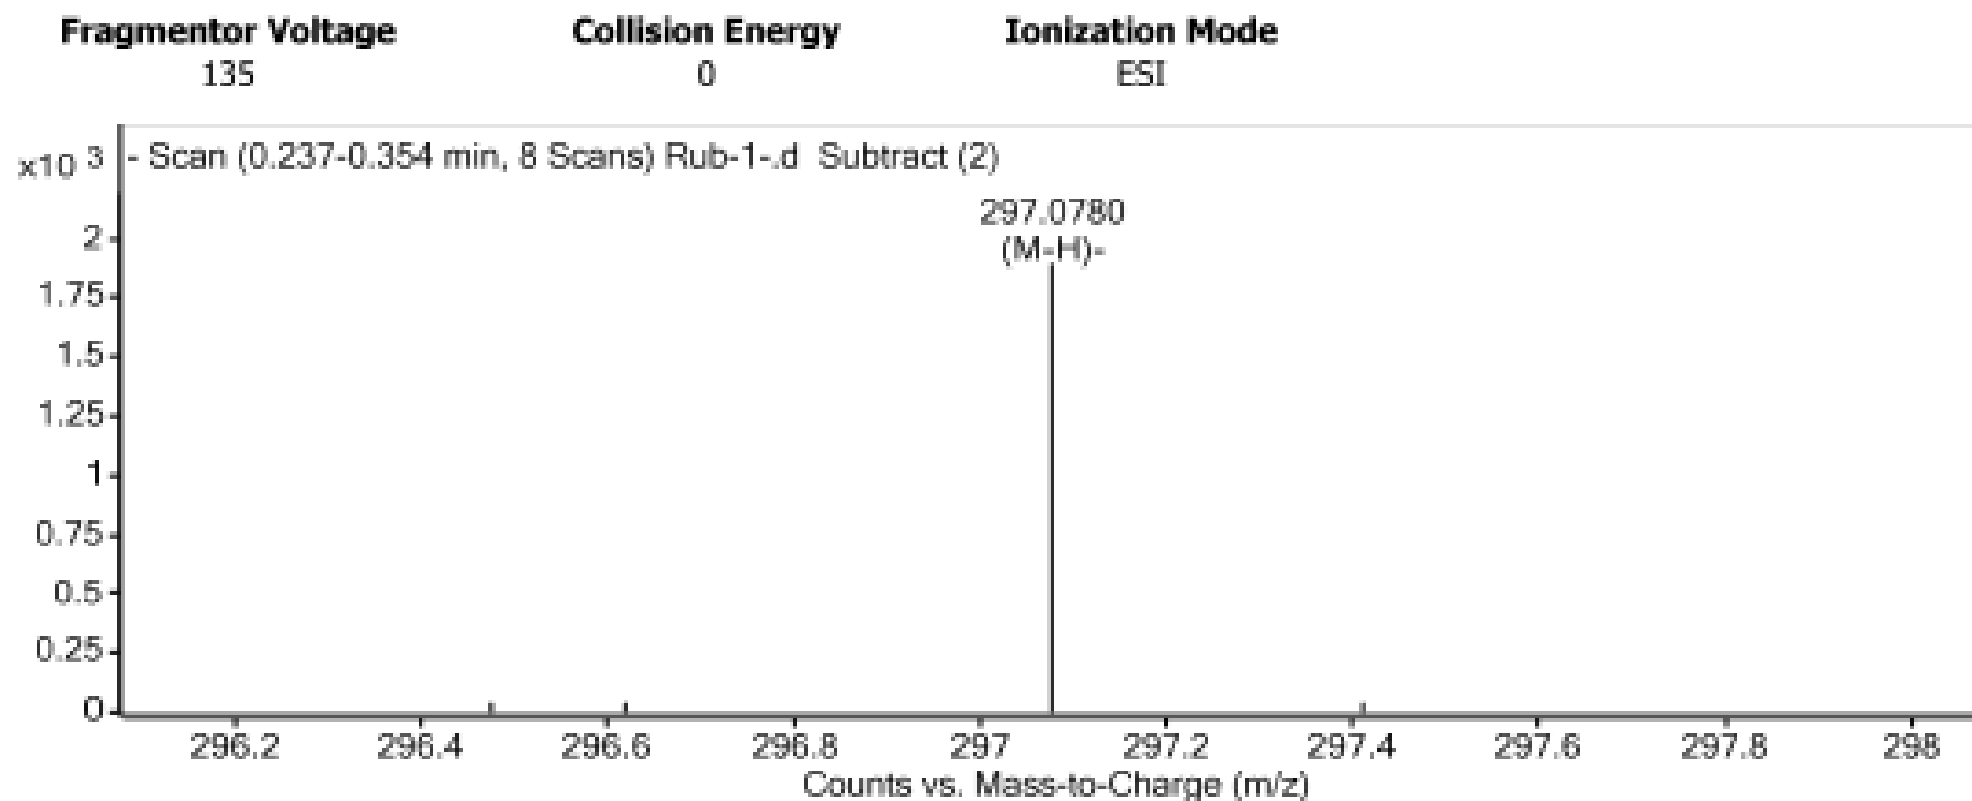

Supplementary Figure 36. HRESIMS analysis of compound 4.

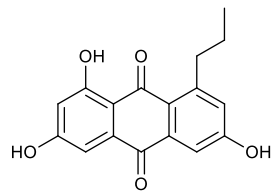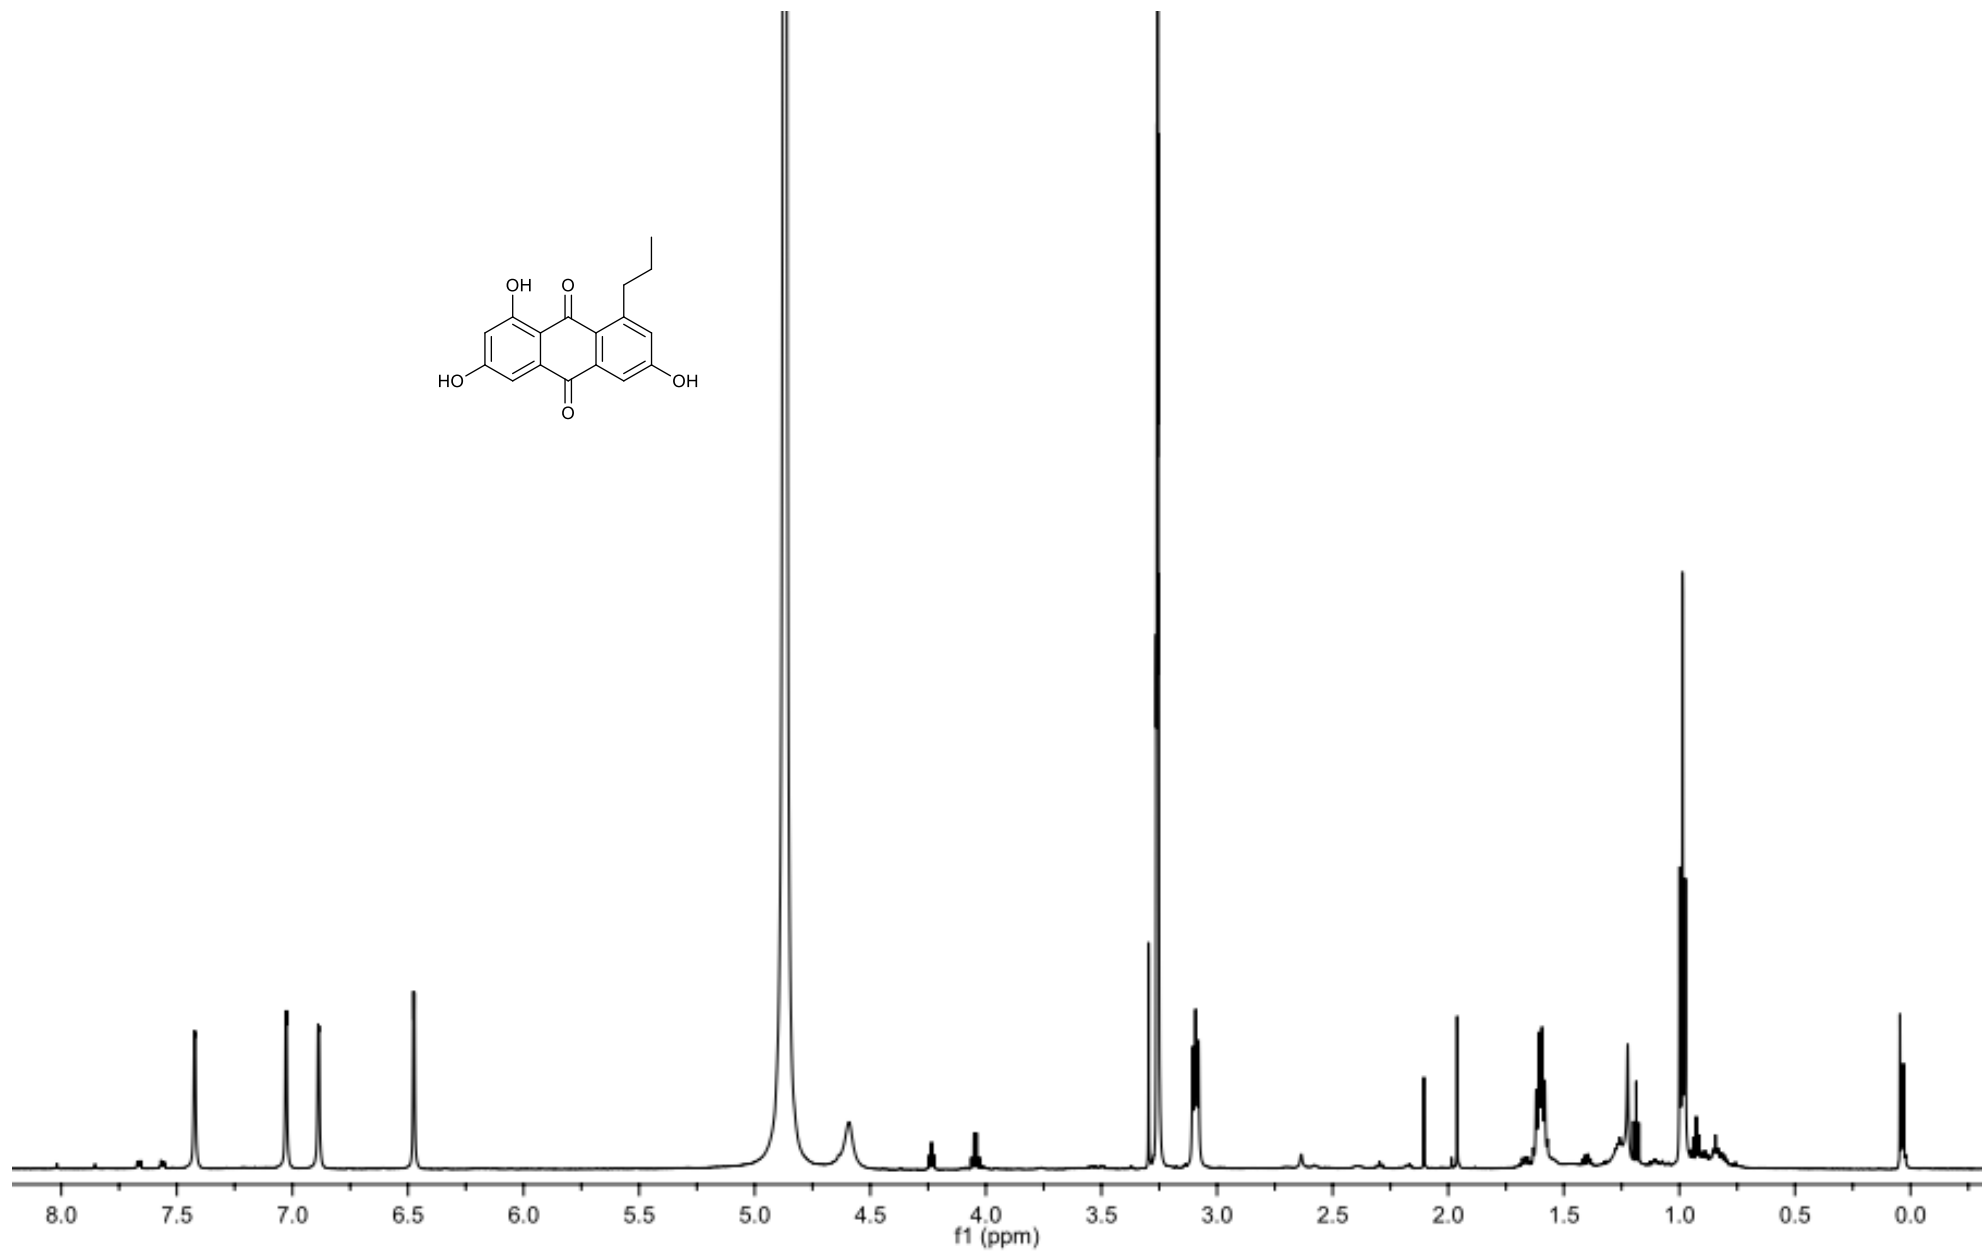

Supplementary Figure 37. <sup>1</sup>H NMR spectrum of compound 5 in CD<sub>3</sub>OD.

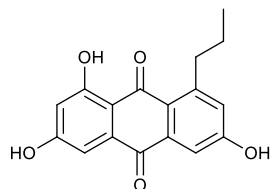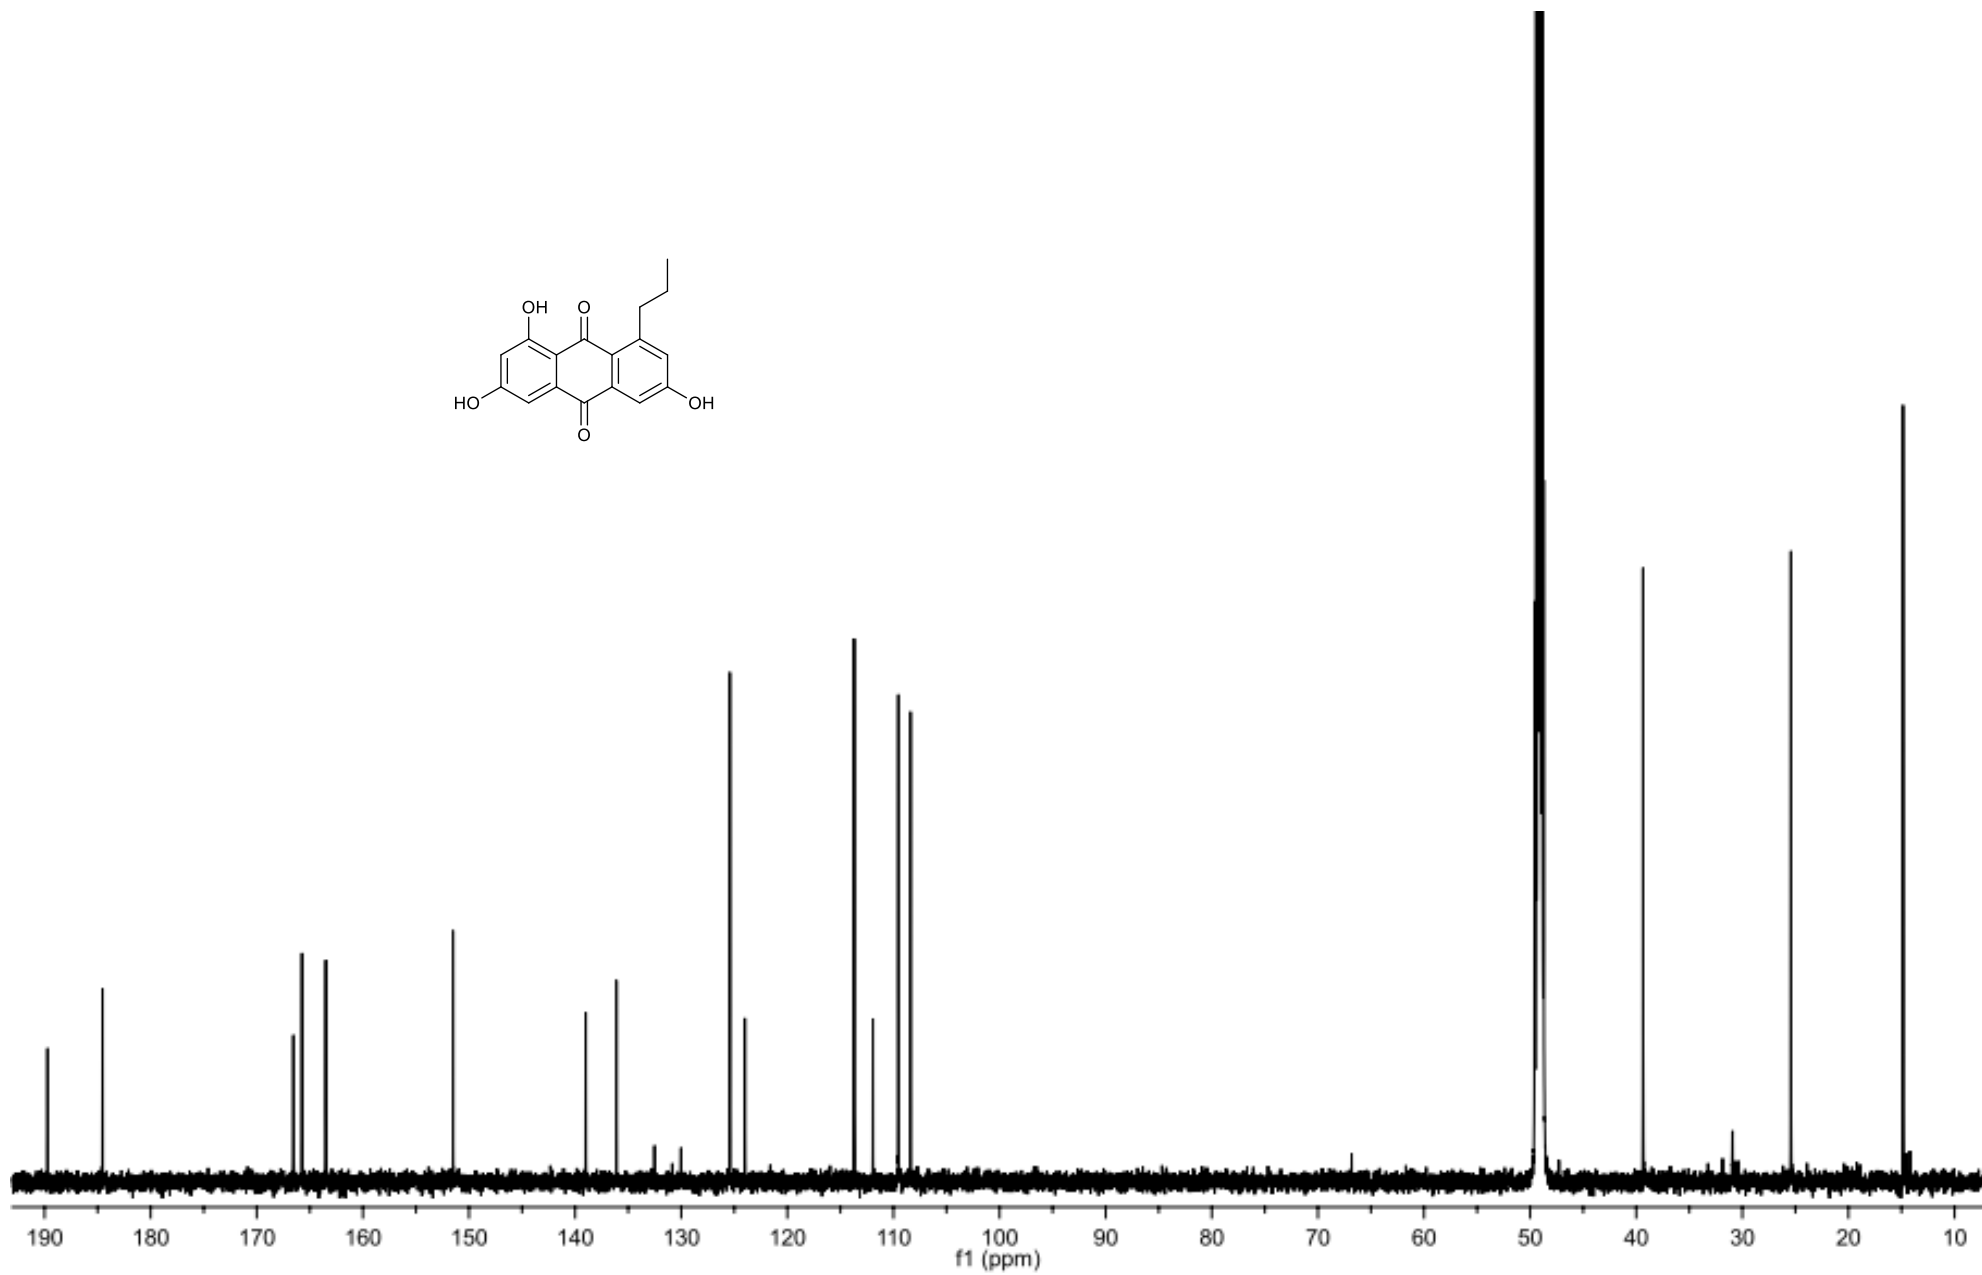

Supplementary Figure 38. <sup>13</sup>C NMR spectrum of compound 5 in CD<sub>3</sub>OD.

## User Spectra

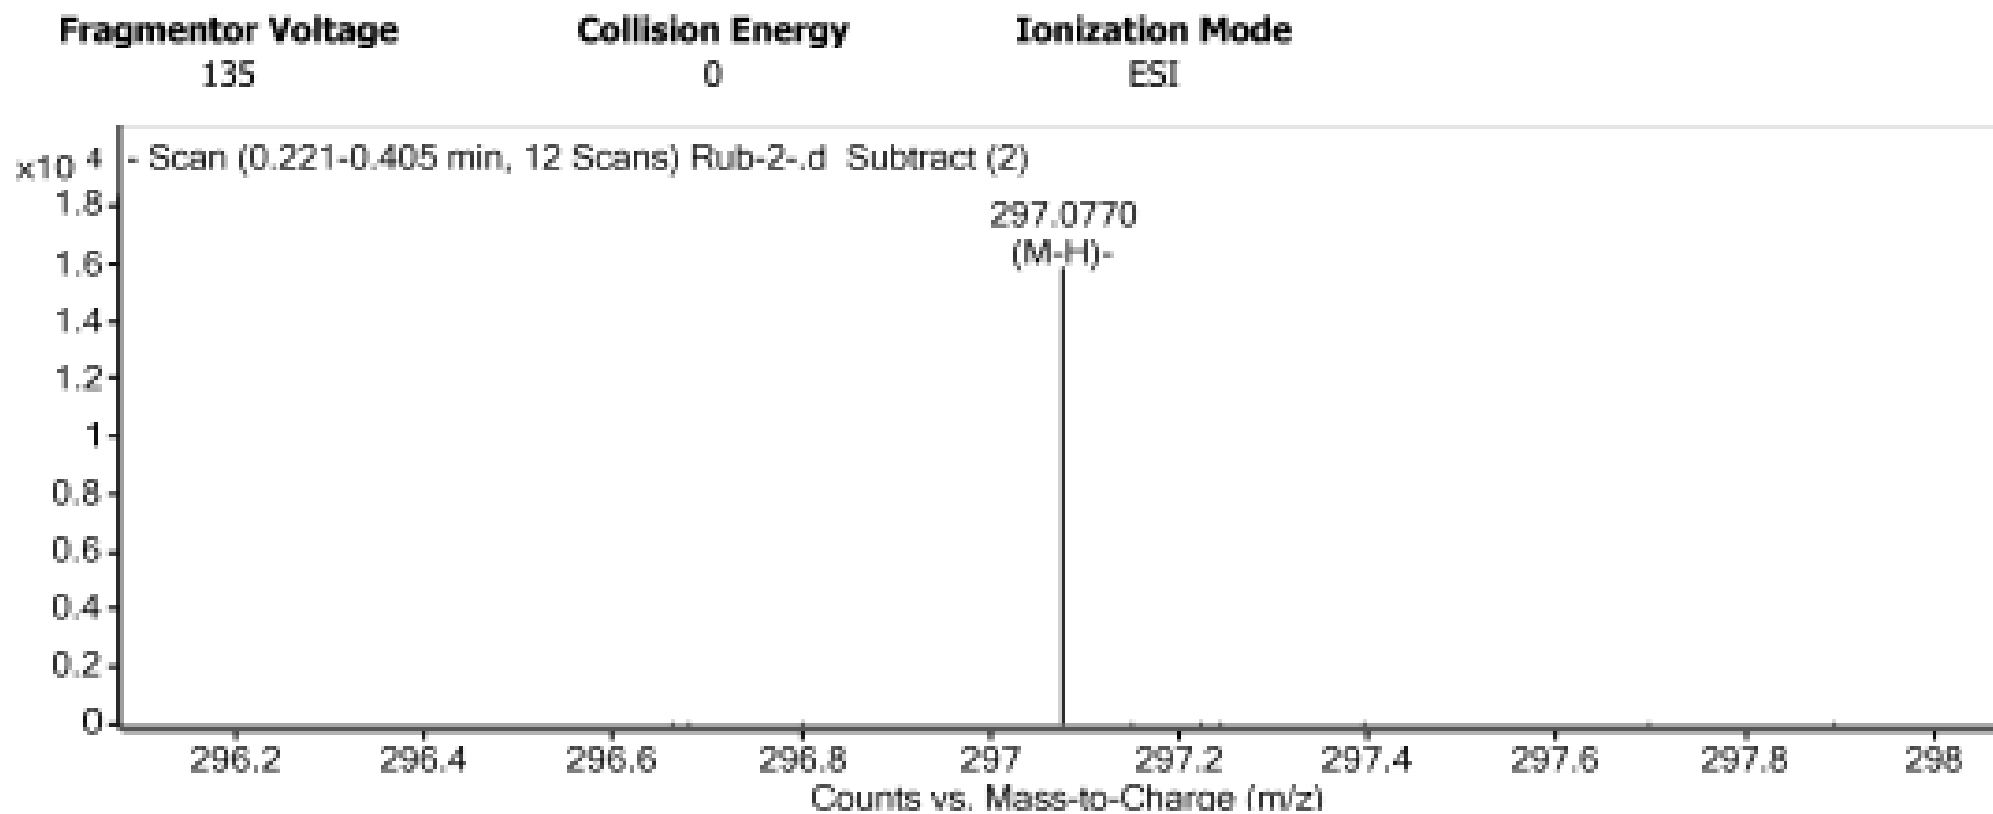

Supplementary Figure 39. HRESIMS analysis of compound 5.

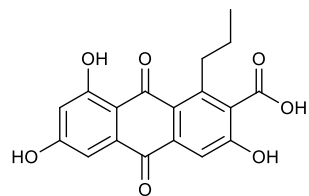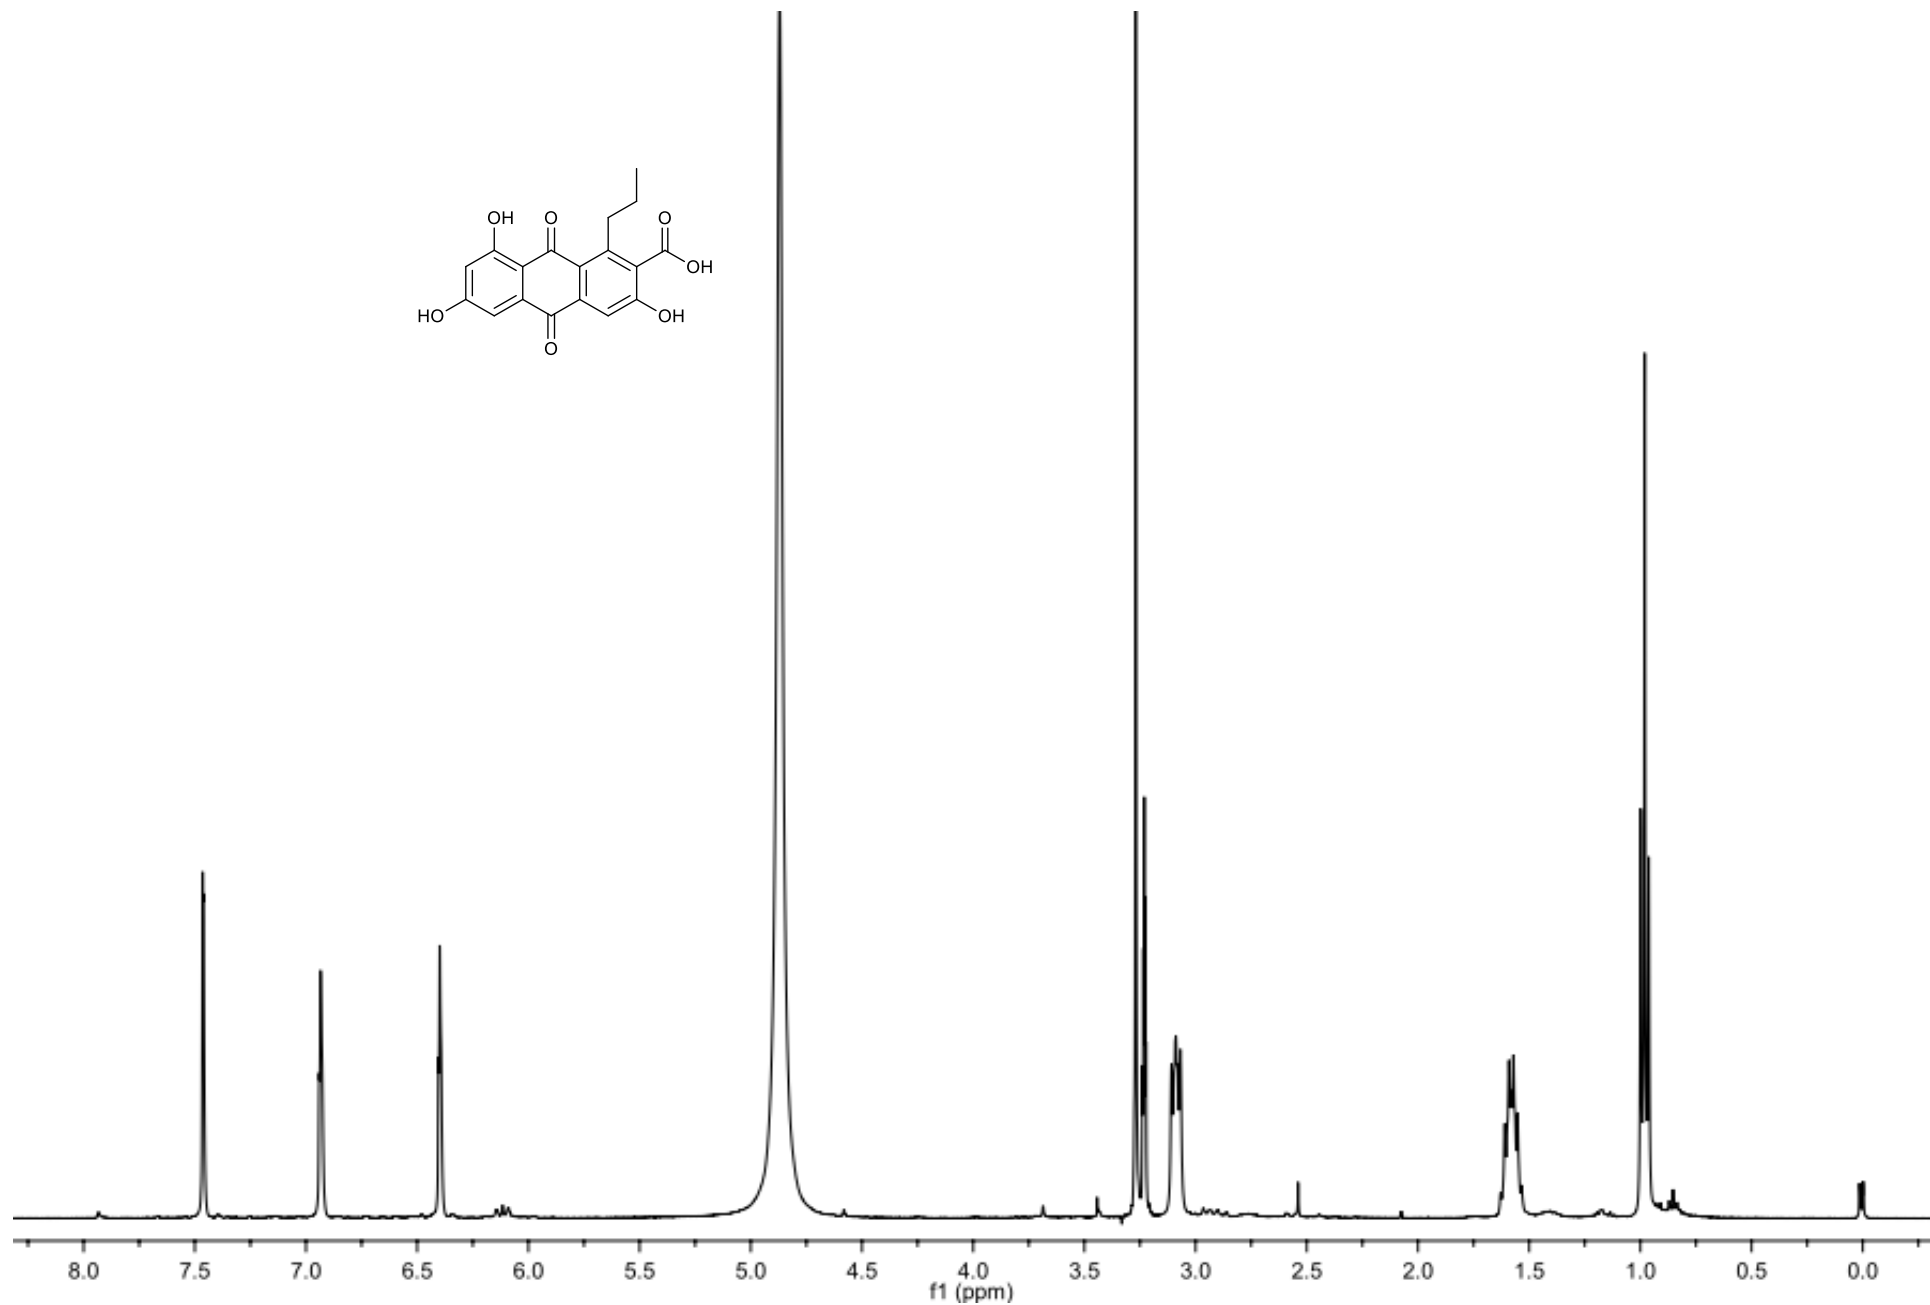

Supplementary Figure 40. <sup>1</sup>H NMR spectrum of compound 6 in CD<sub>3</sub>OD.



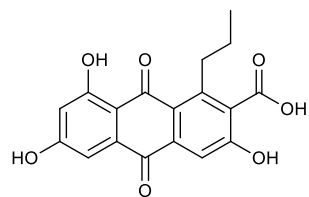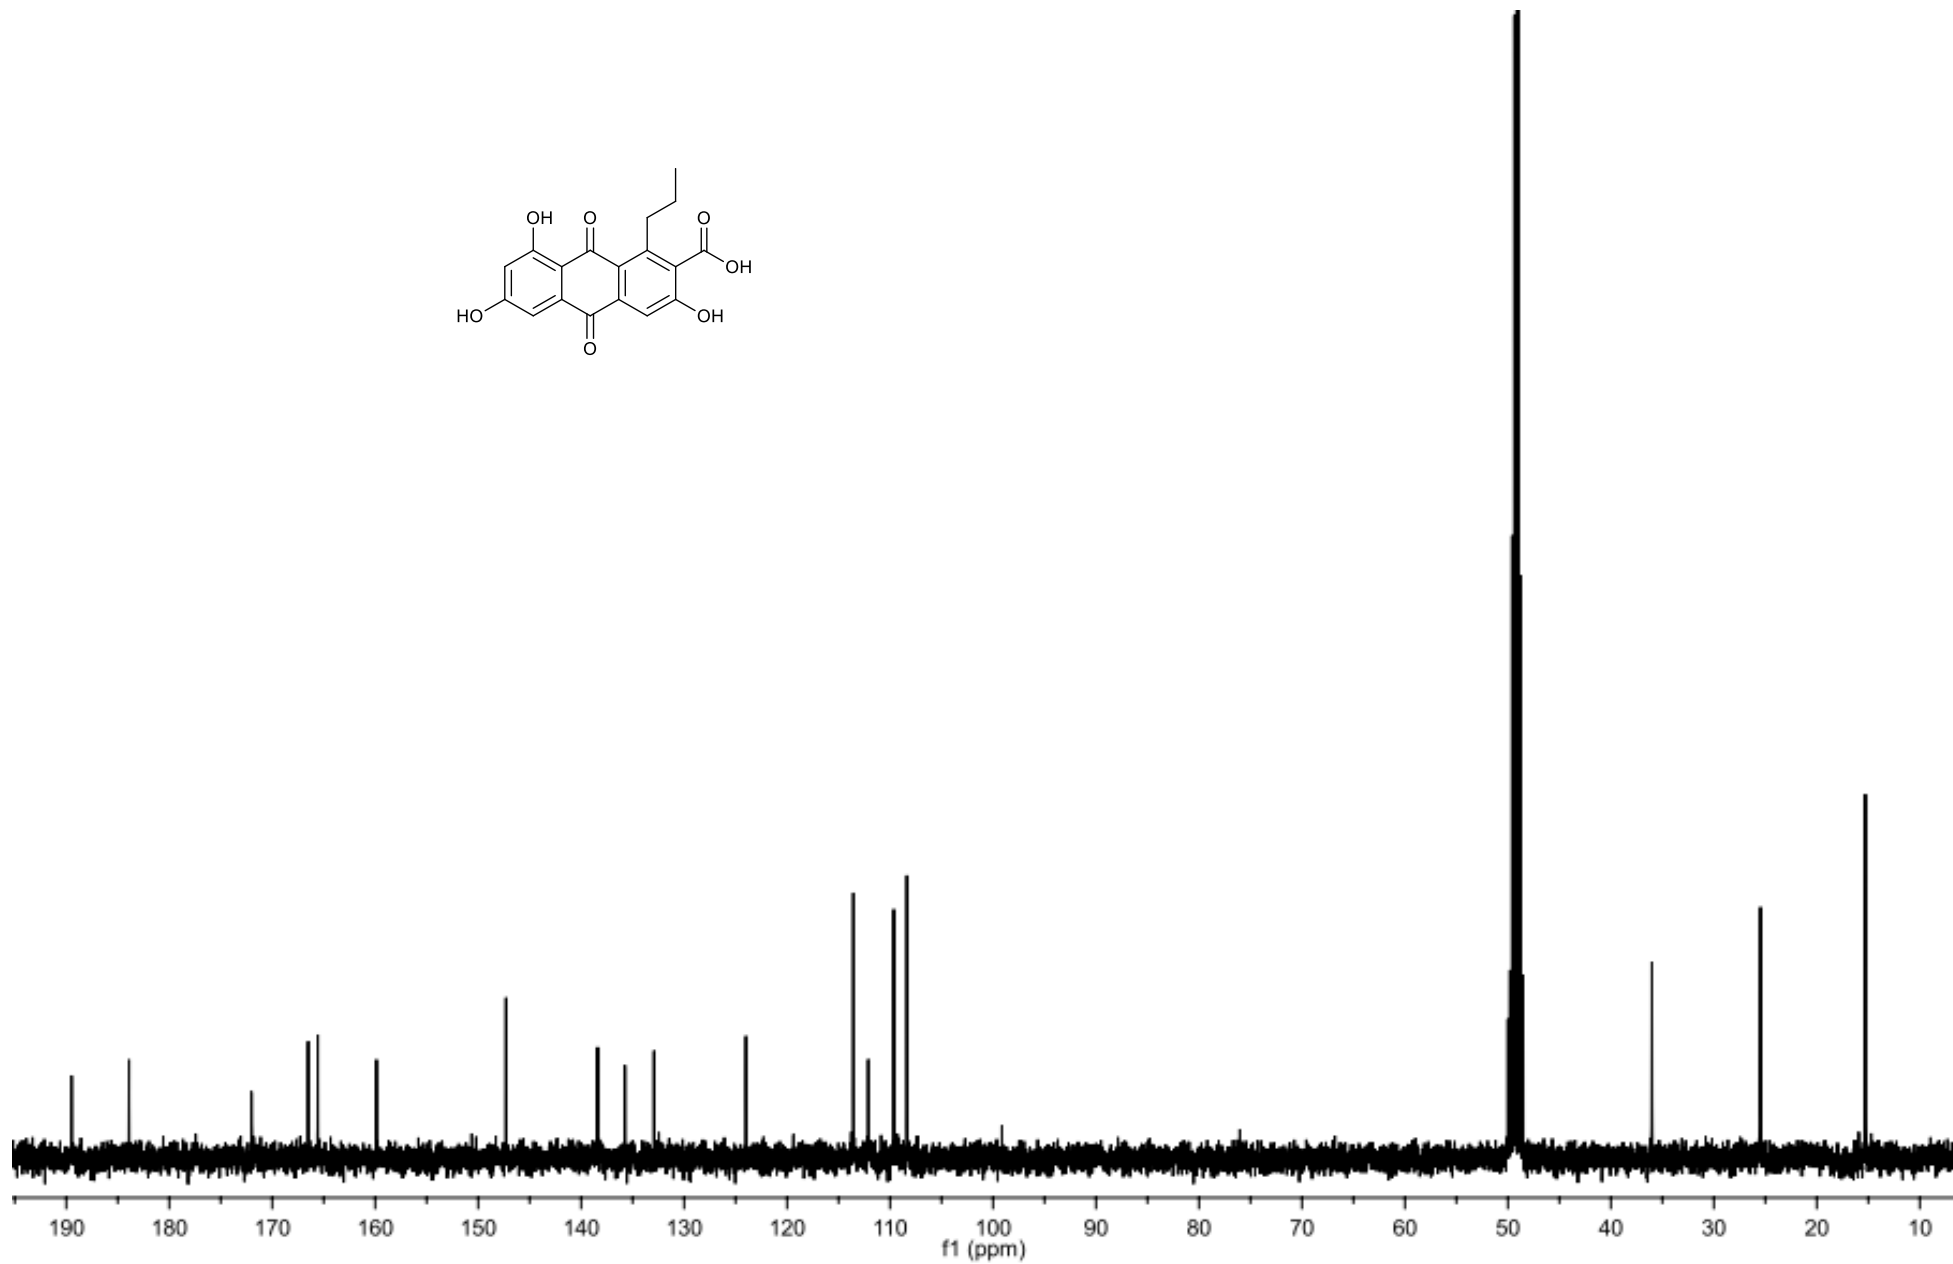

Supplementary Figure 41. <sup>13</sup>C NMR spectrum of compound 6 in CD<sub>3</sub>OD.

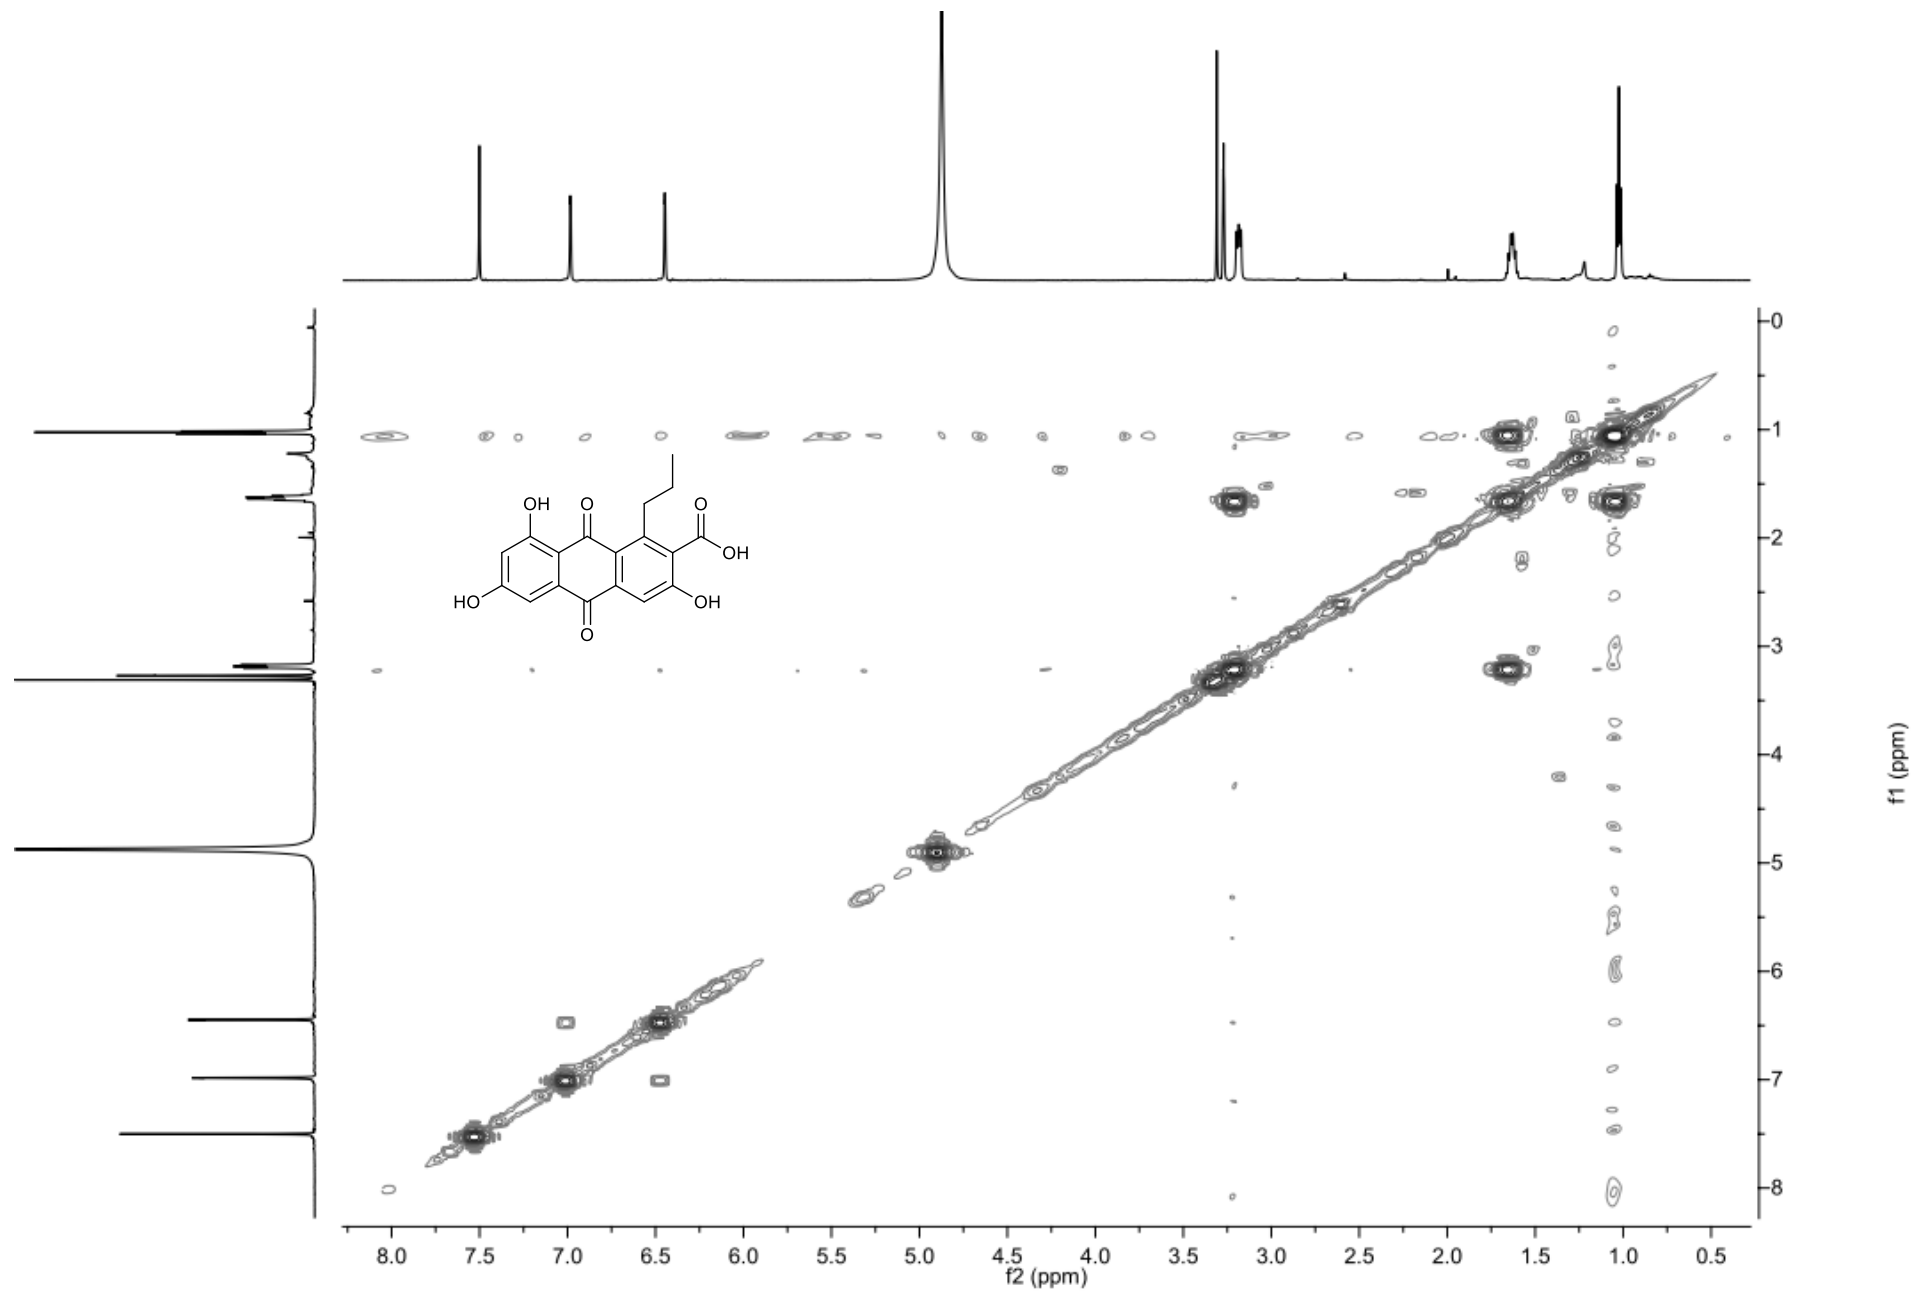

Supplementary Figure 42.  $^1\text{H}$ - $^1\text{H}$  COSY NMR spectrum of compound **6** in  $\text{CD}_3\text{OD}$ .

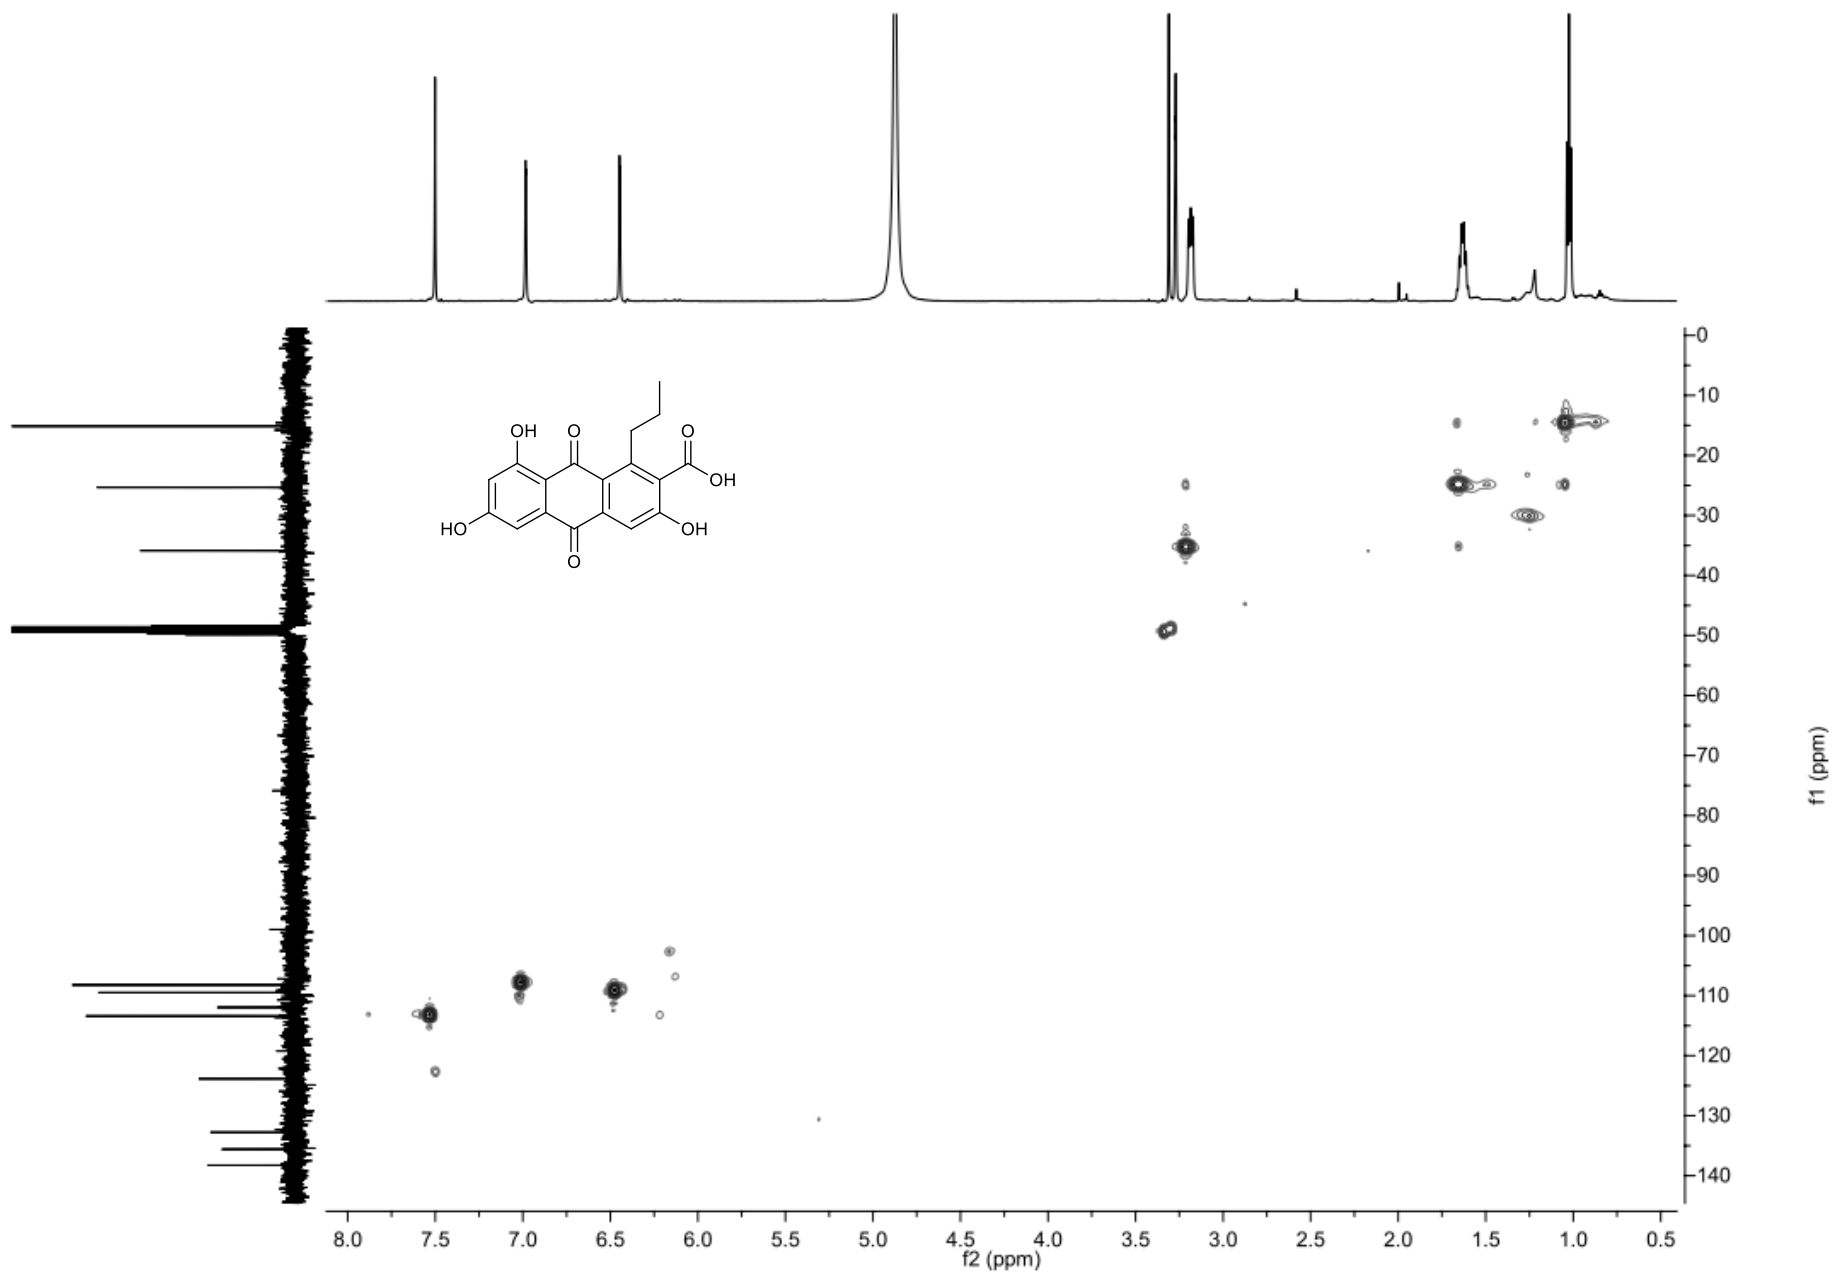

Supplementary Figure 43. HSQC NMR spectrum of compound 6 in CD<sub>3</sub>OD.

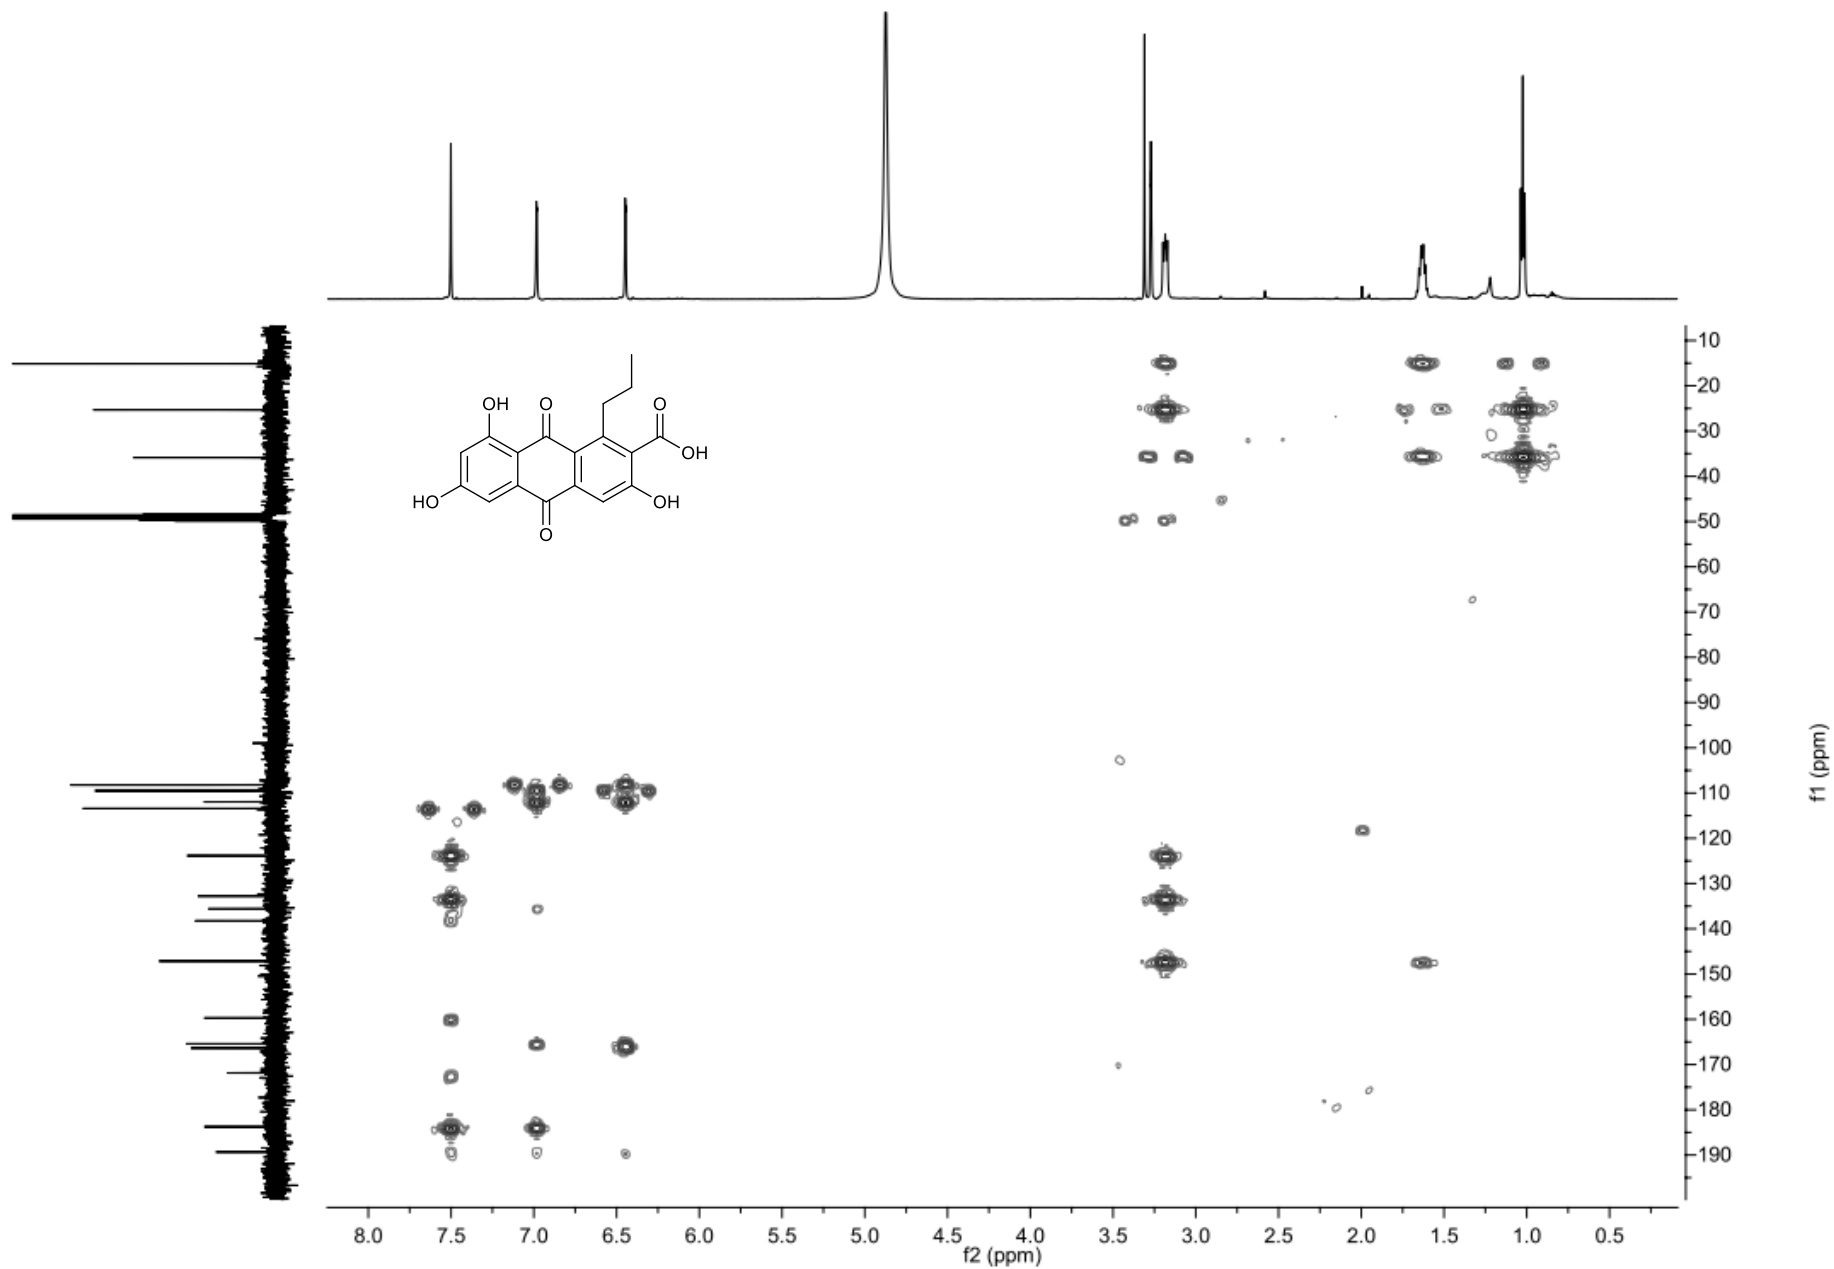

Supplementary Figure 44. HMBC NMR spectrum of compound **6** in CD<sub>3</sub>OD.

## User Spectra

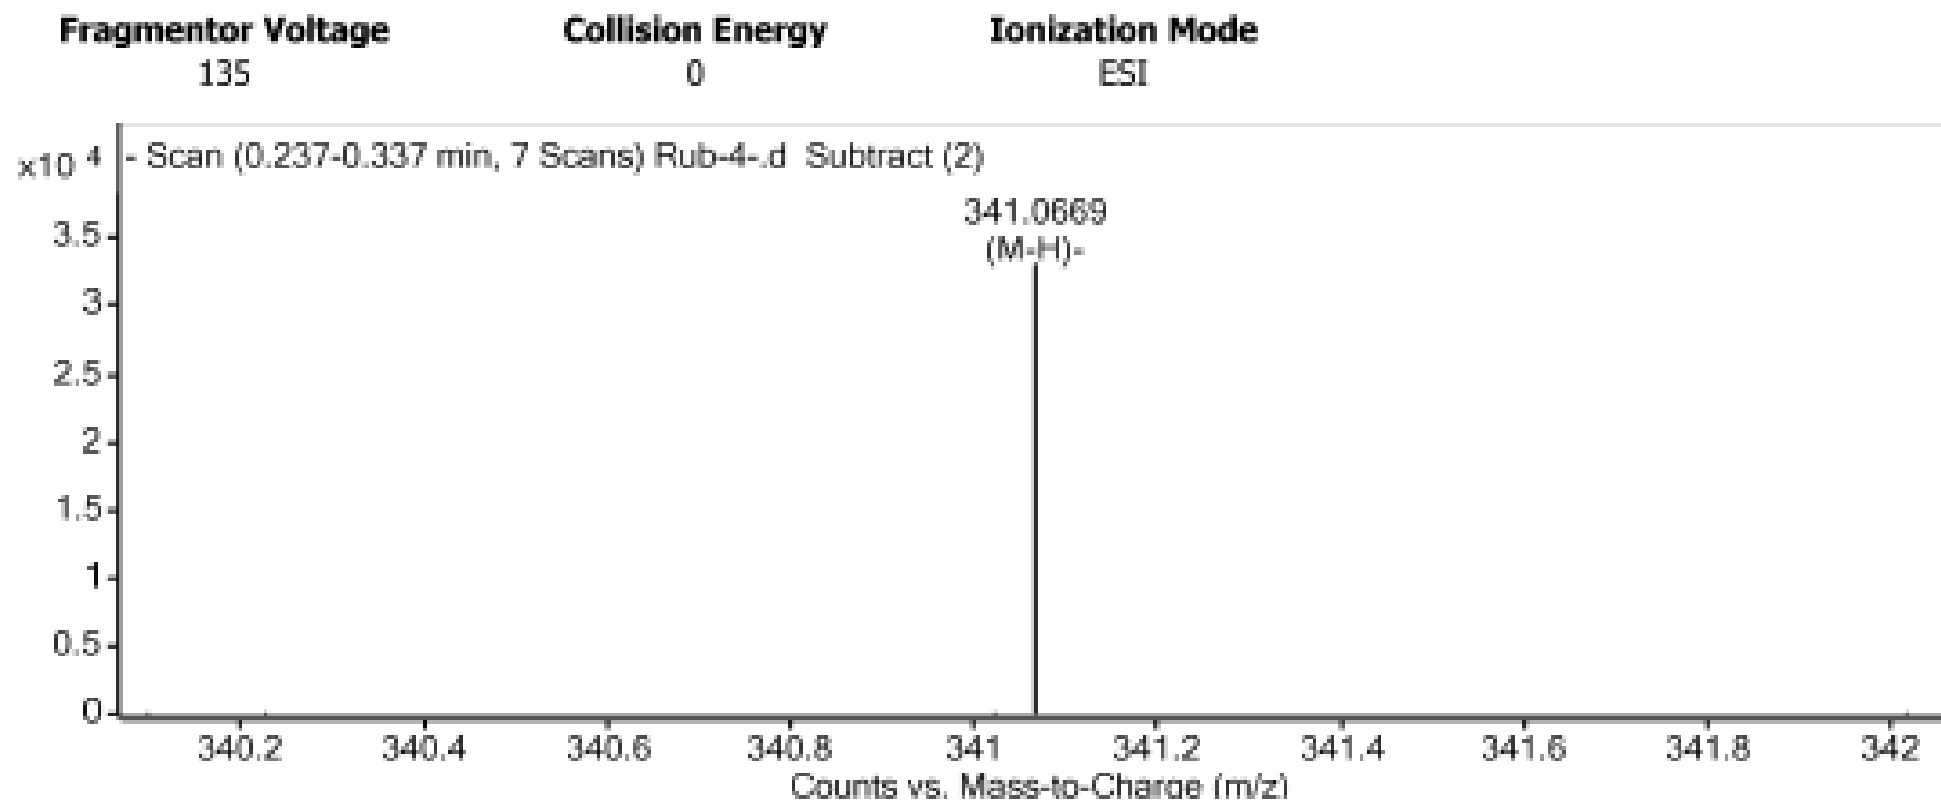

Supplementary Figure 45. HRESIMS analysis of compound 6.

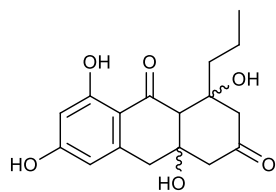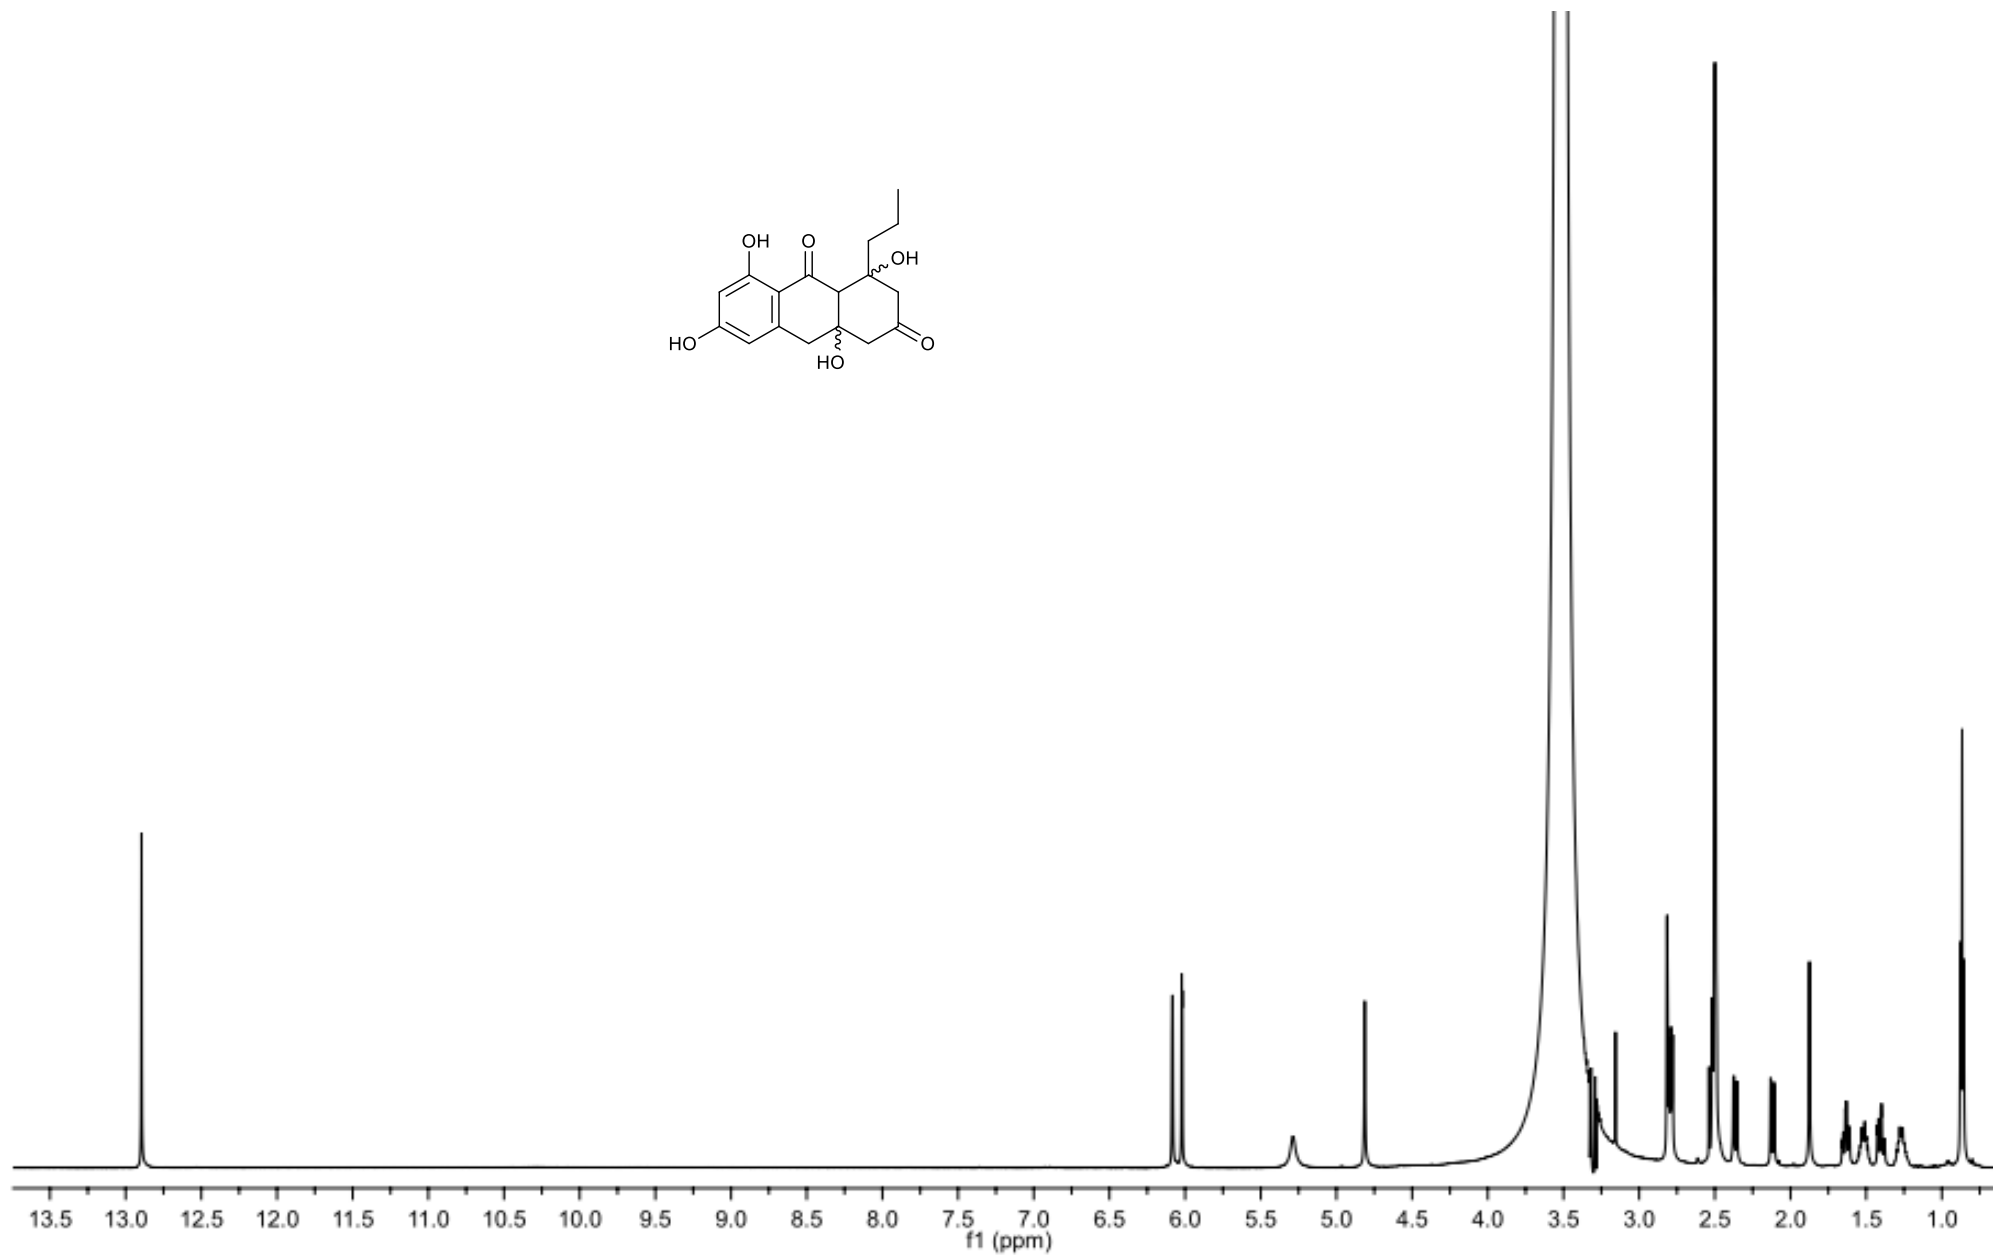

Supplementary Figure 46.  $^1\text{H}$  NMR spectrum of compound 7 in  $\text{DMSO-}d_6$ .

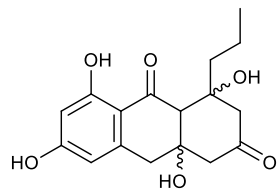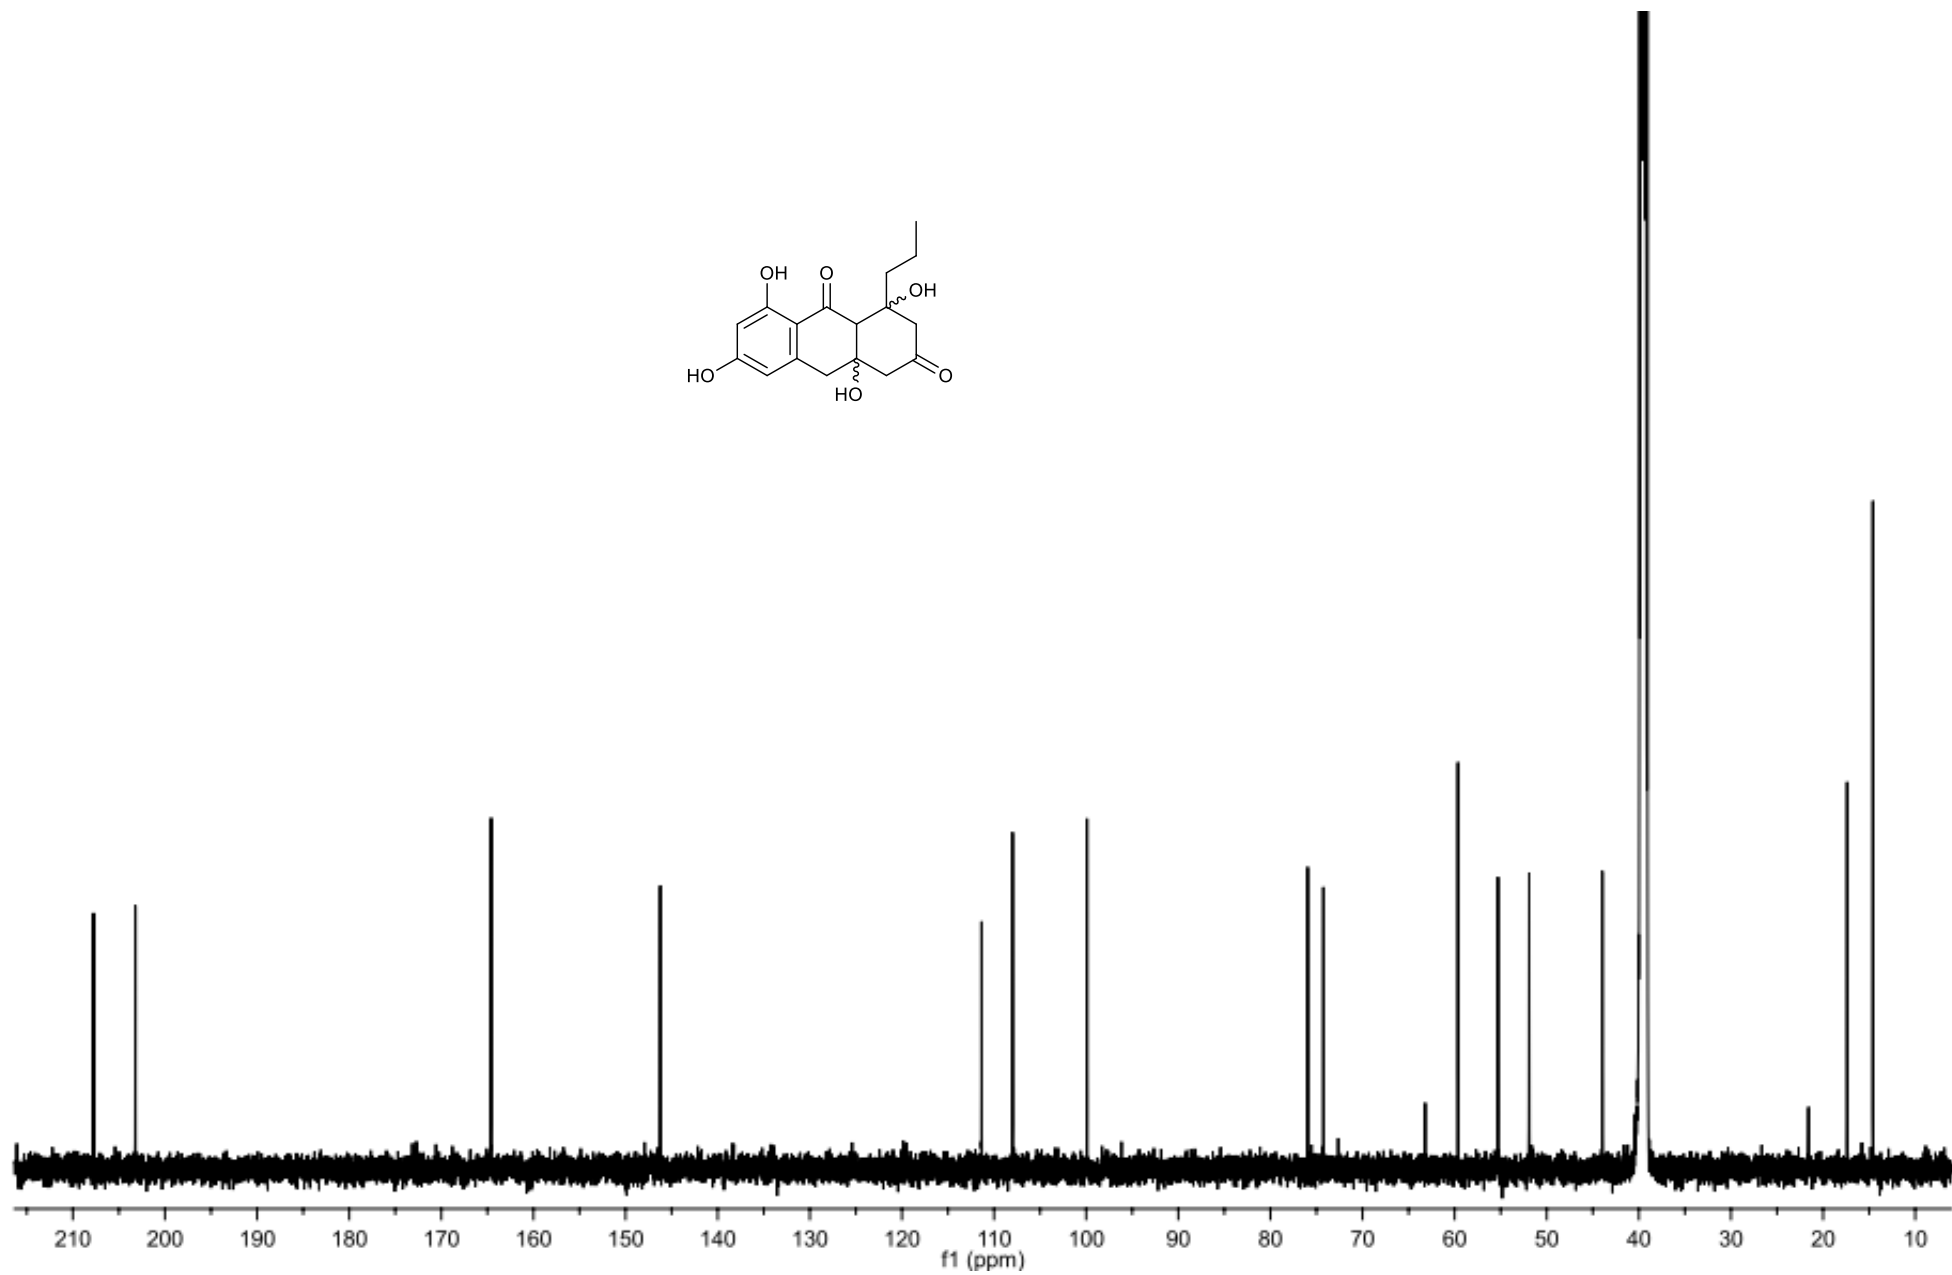

Supplementary Figure 47.  $^{13}\text{C}$  NMR spectrum of compound 7 in  $\text{DMSO-}d_6$ .

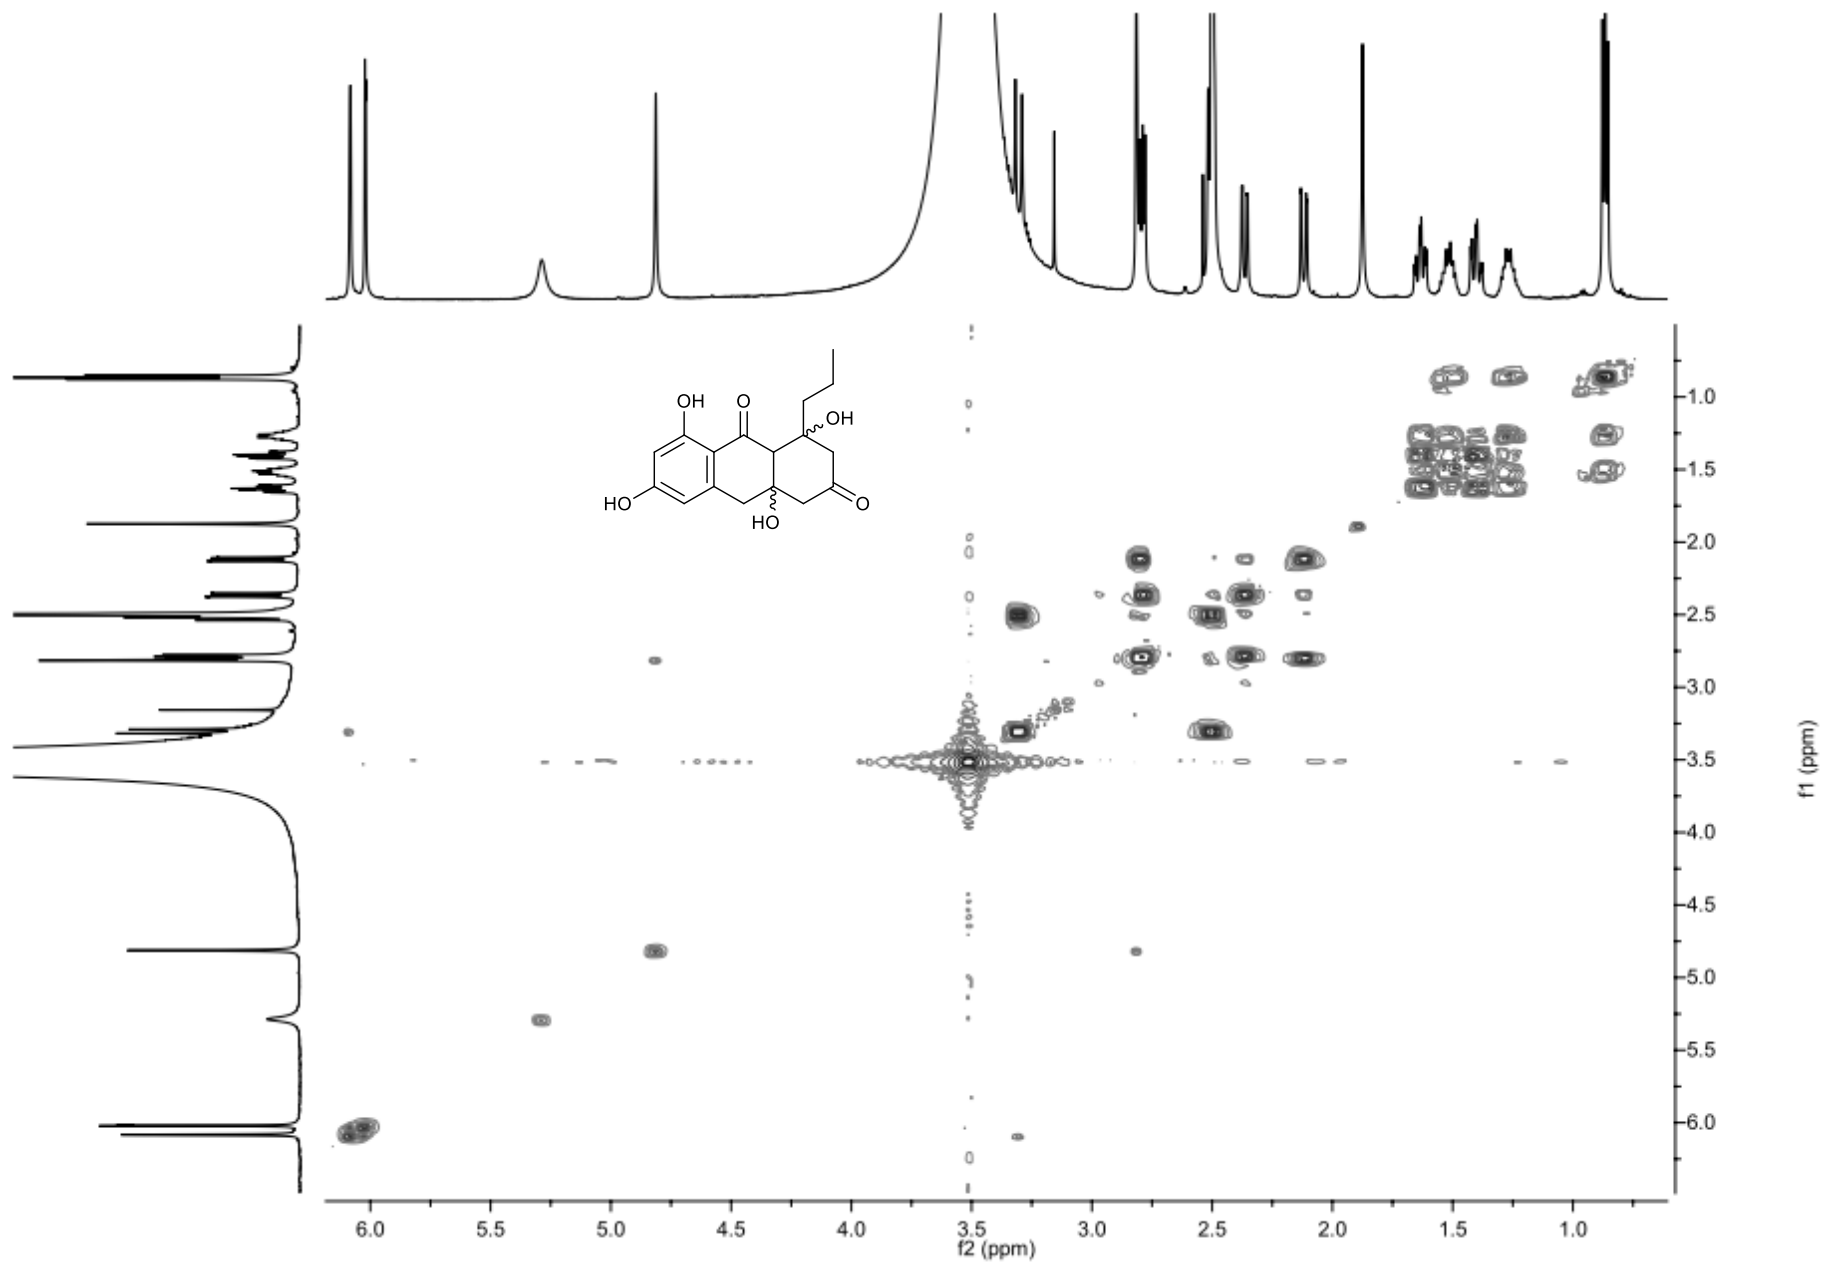

Supplementary Figure 48.  $^1\text{H}$ - $^1\text{H}$  COSY NMR spectrum of compound 7 in  $\text{DMSO-}d_6$ .



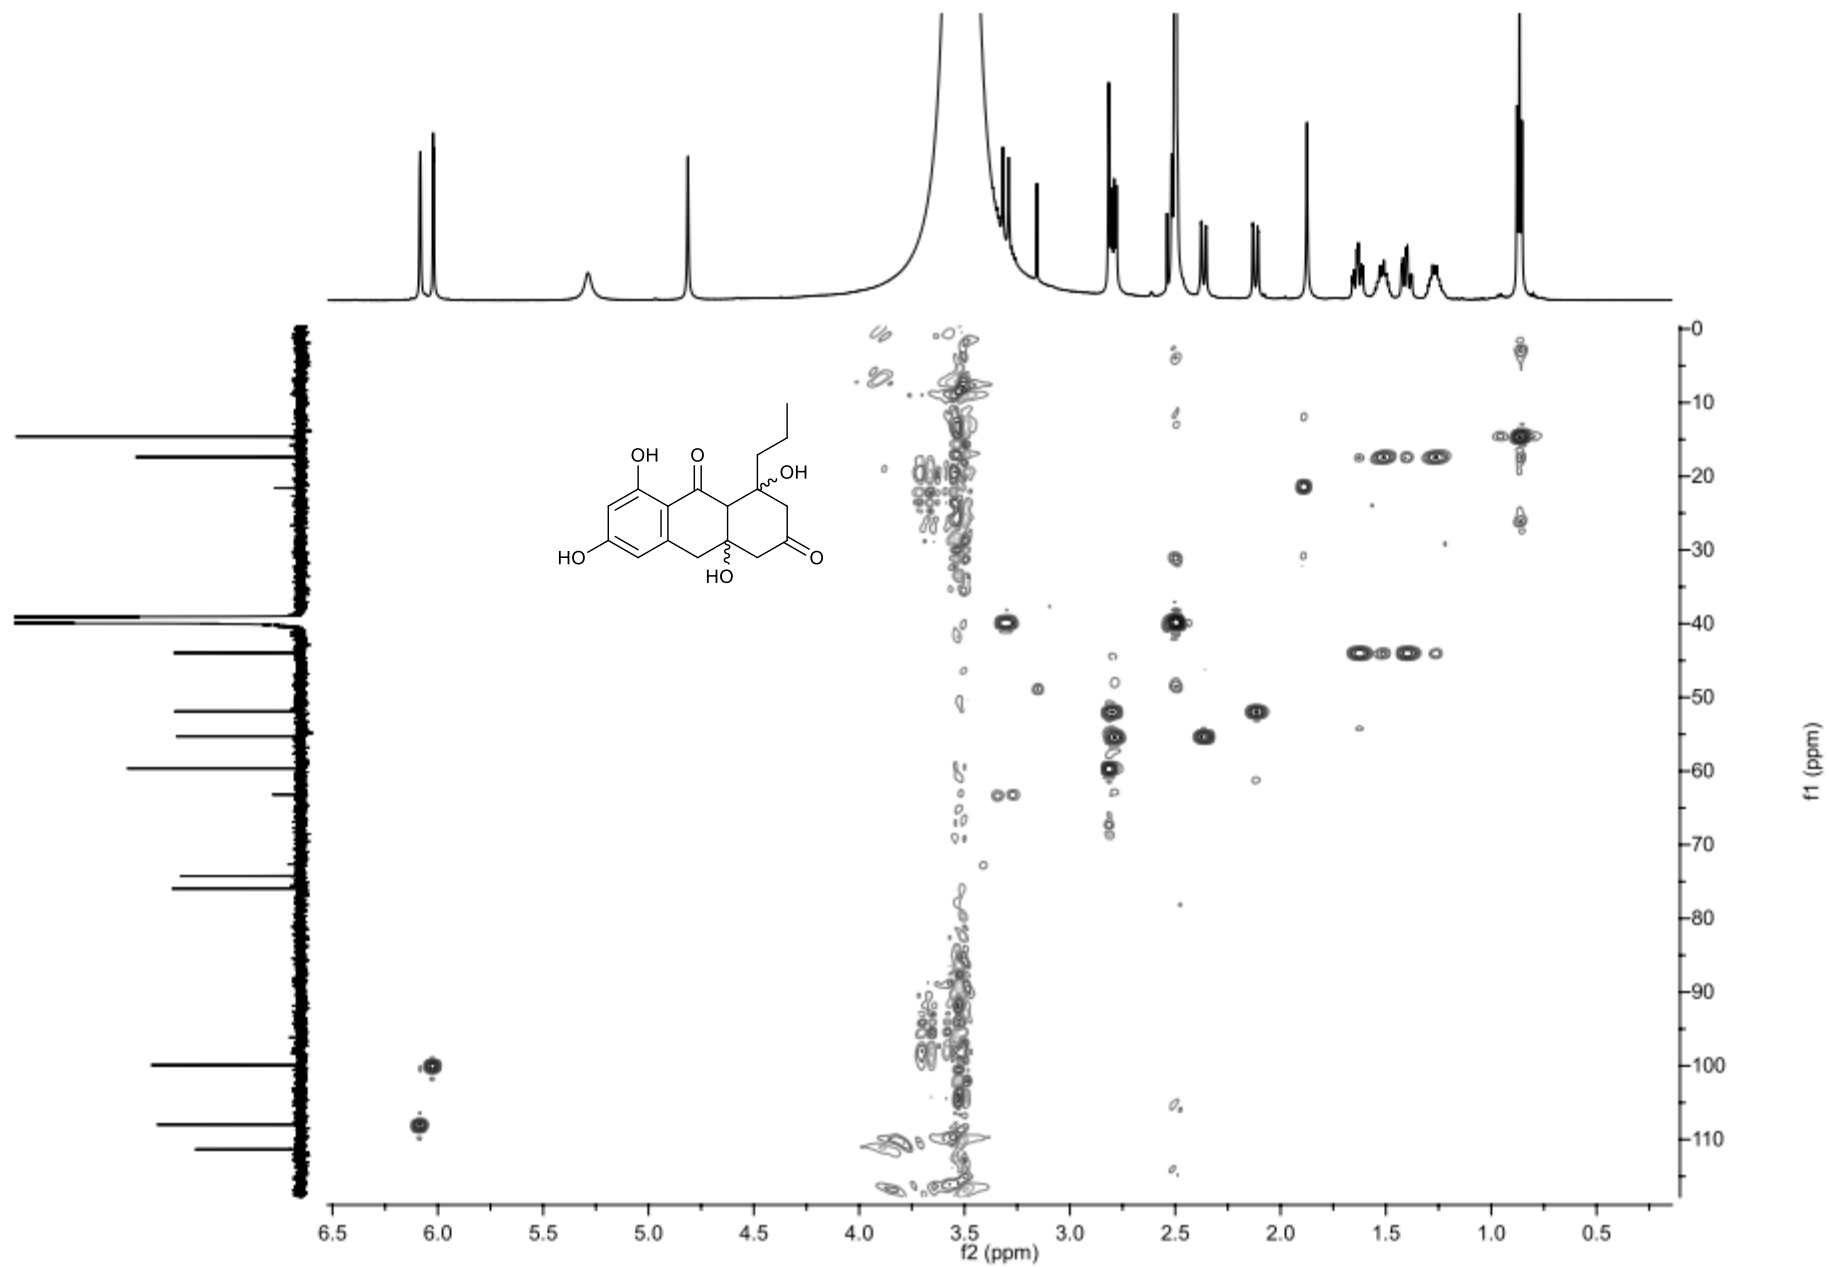

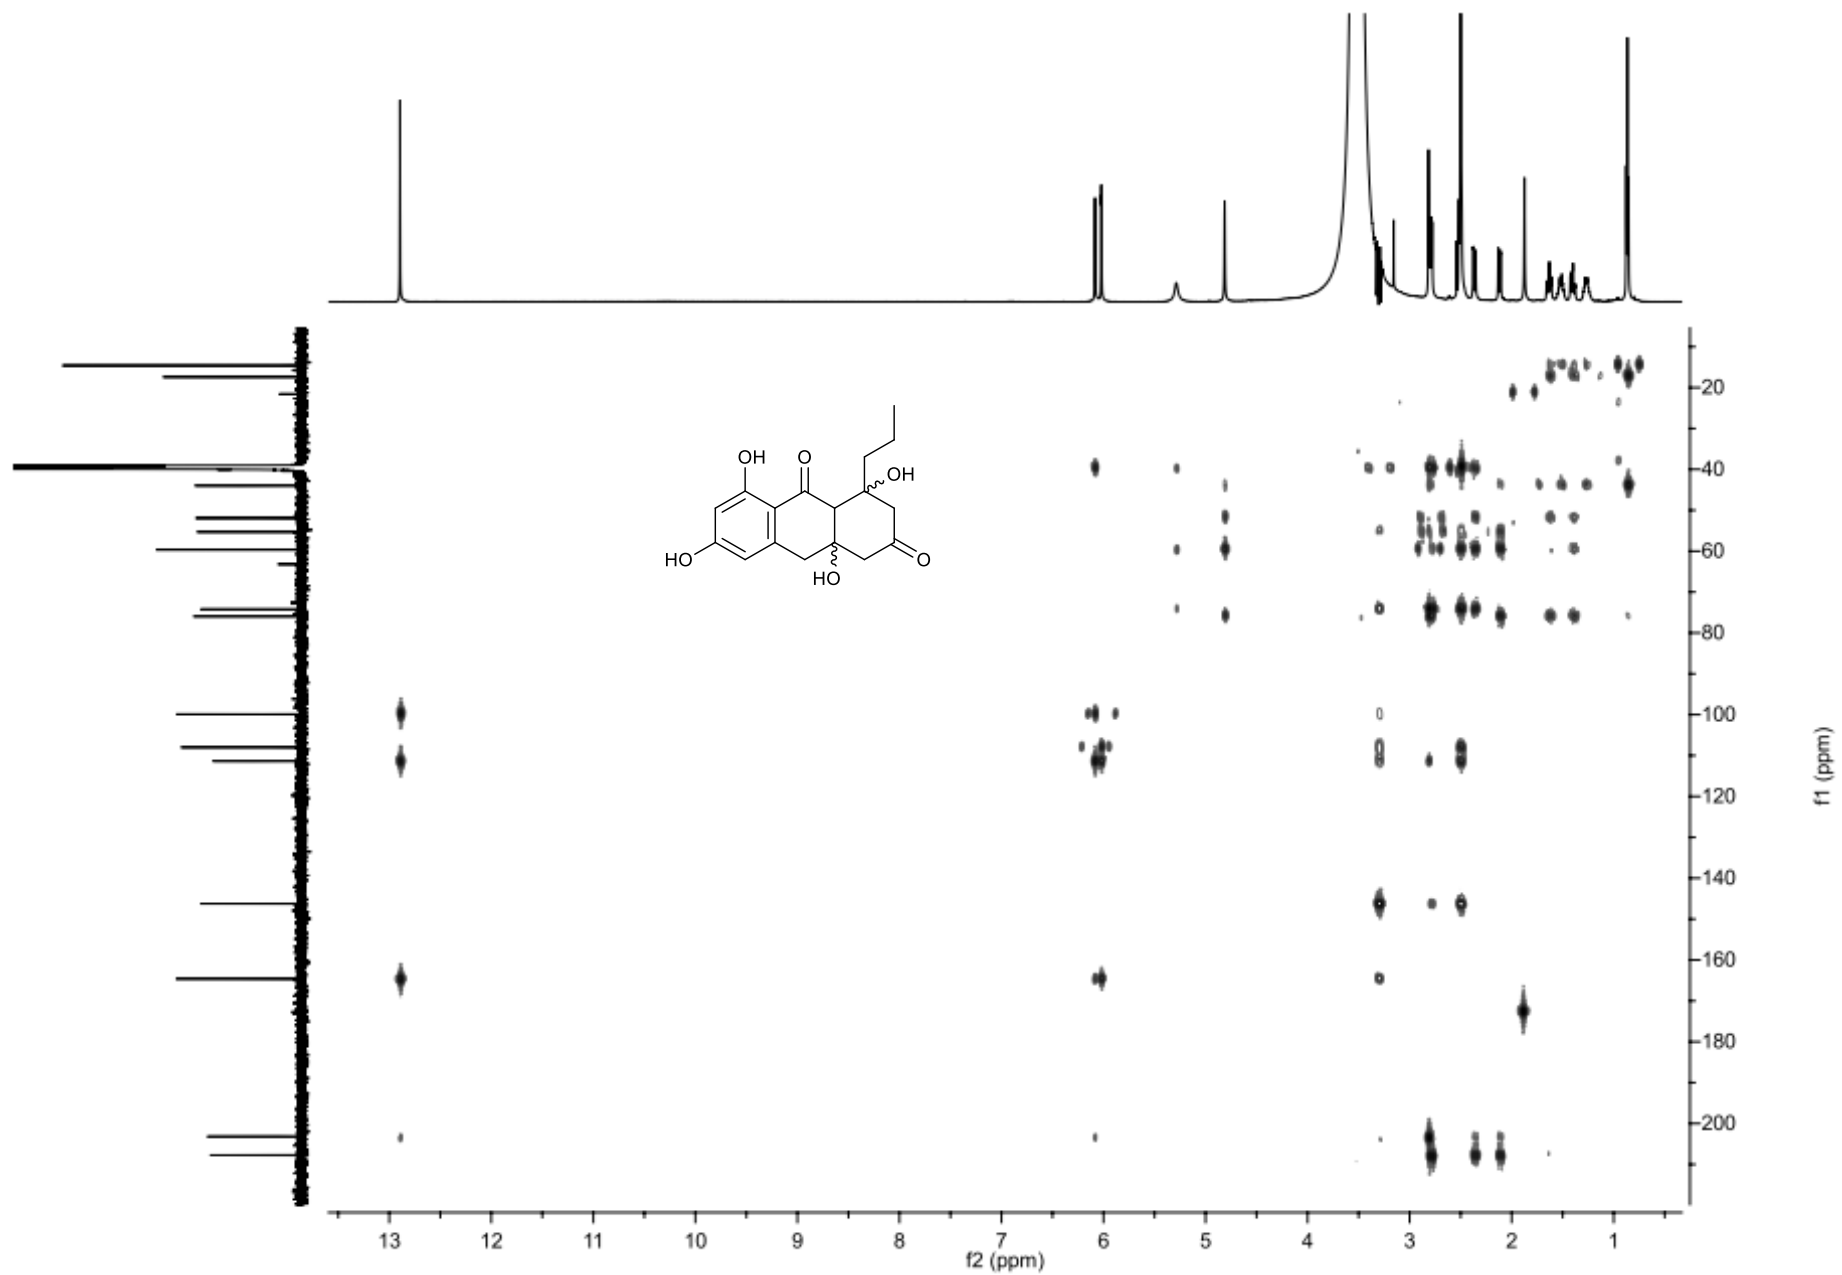

Supplementary Figure 50. HMBC NMR spectrum of compound 7 in DMSO-*d*<sub>6</sub>.

# User Spectra

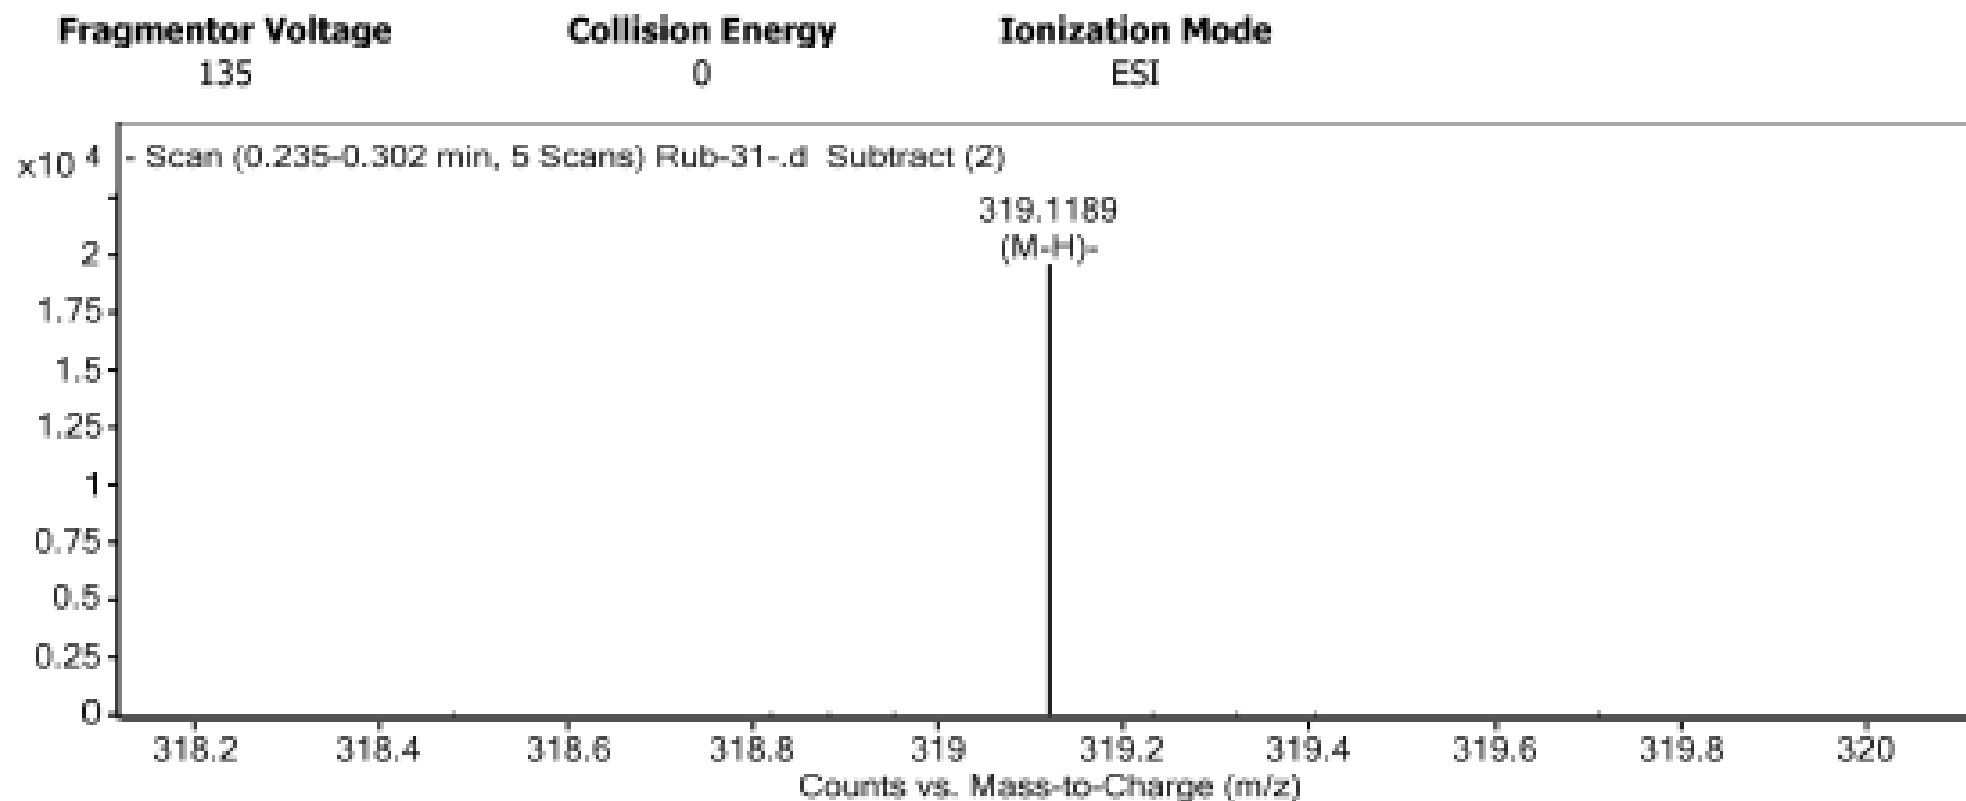

Supplementary Figure 51. HRESIMS analysis of compound 7.

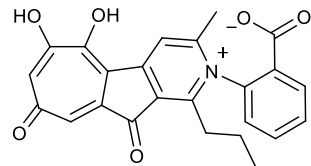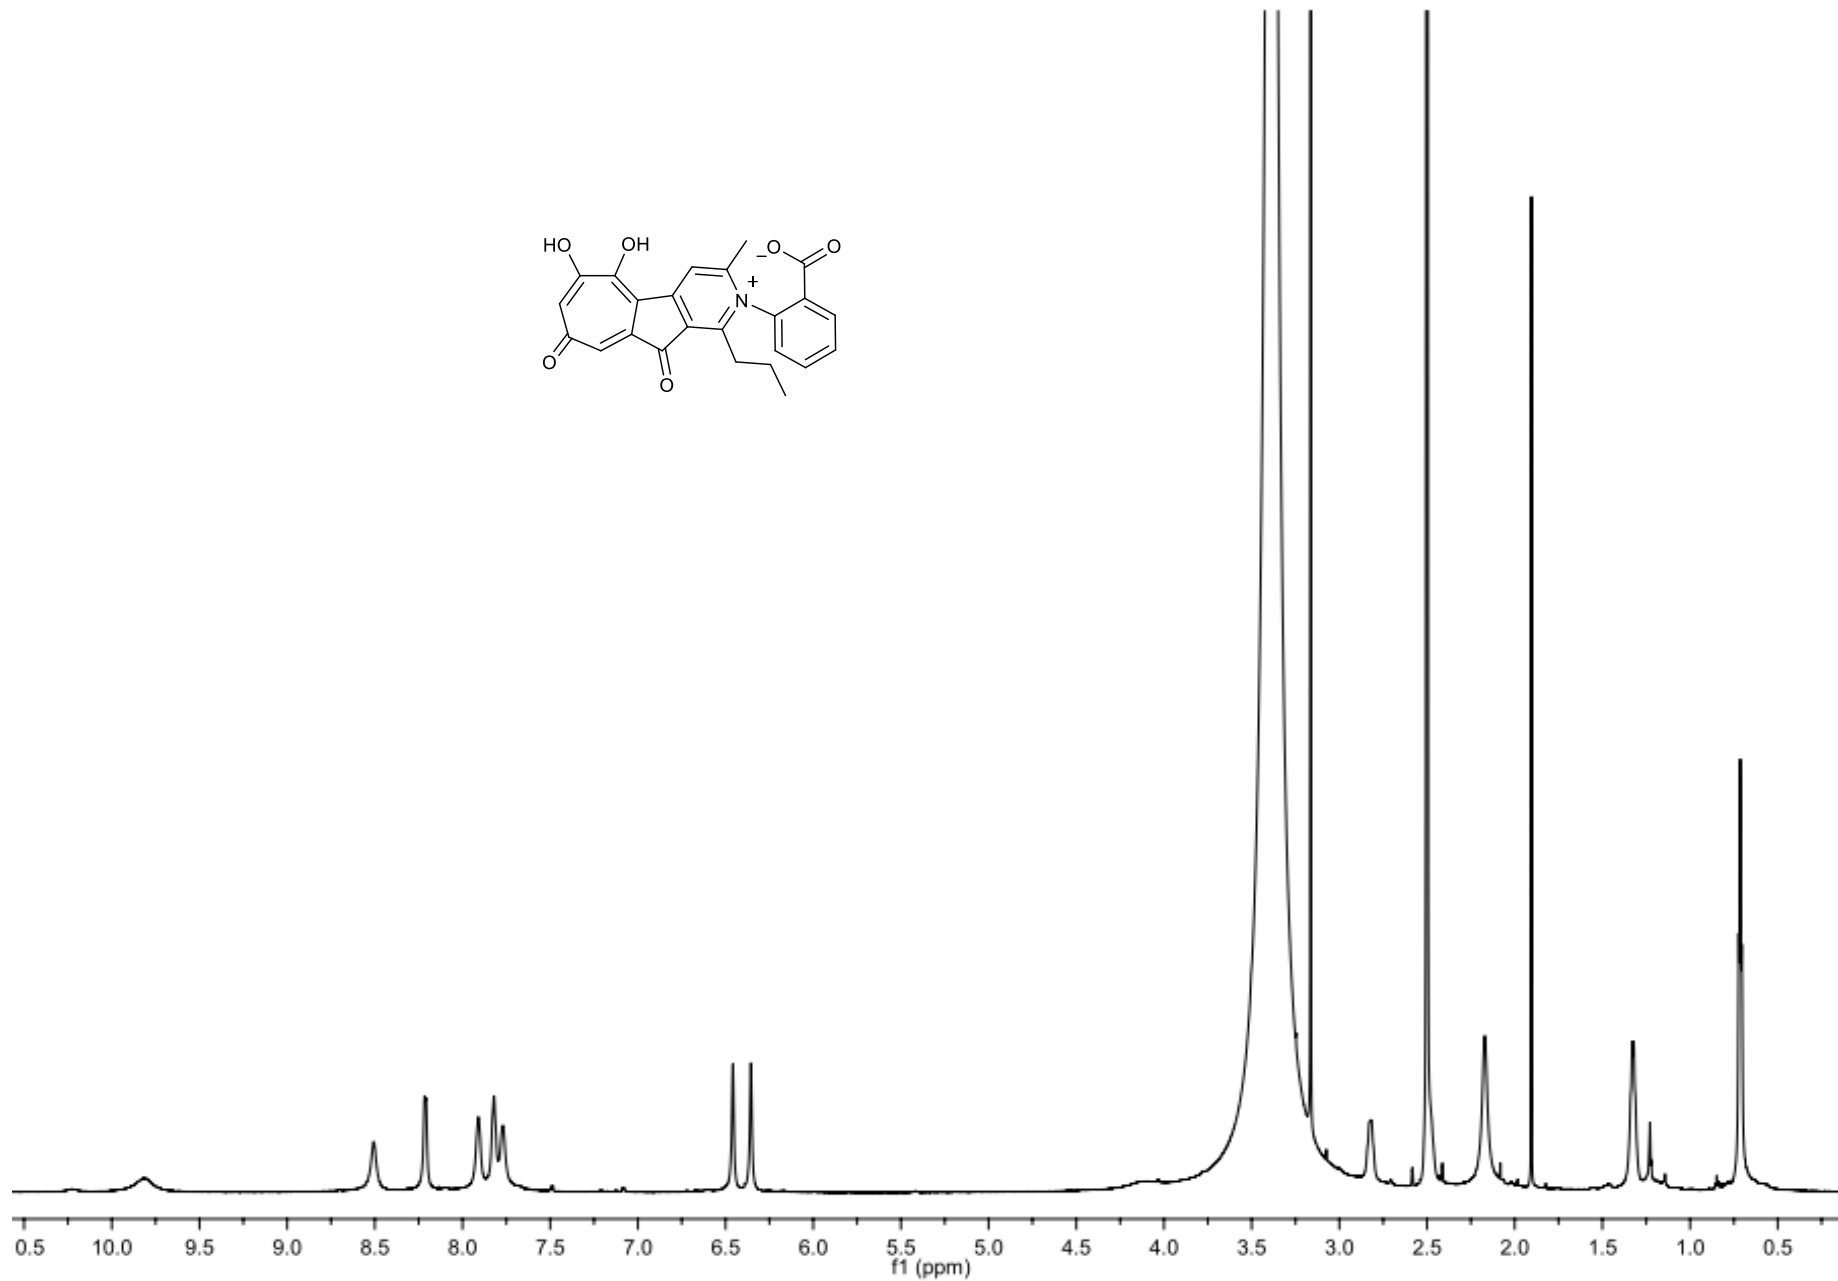

Supplementary Figure 52. <sup>1</sup>H NMR spectrum of compound 8 in DMSO-d<sub>6</sub>.

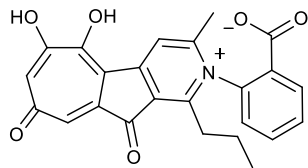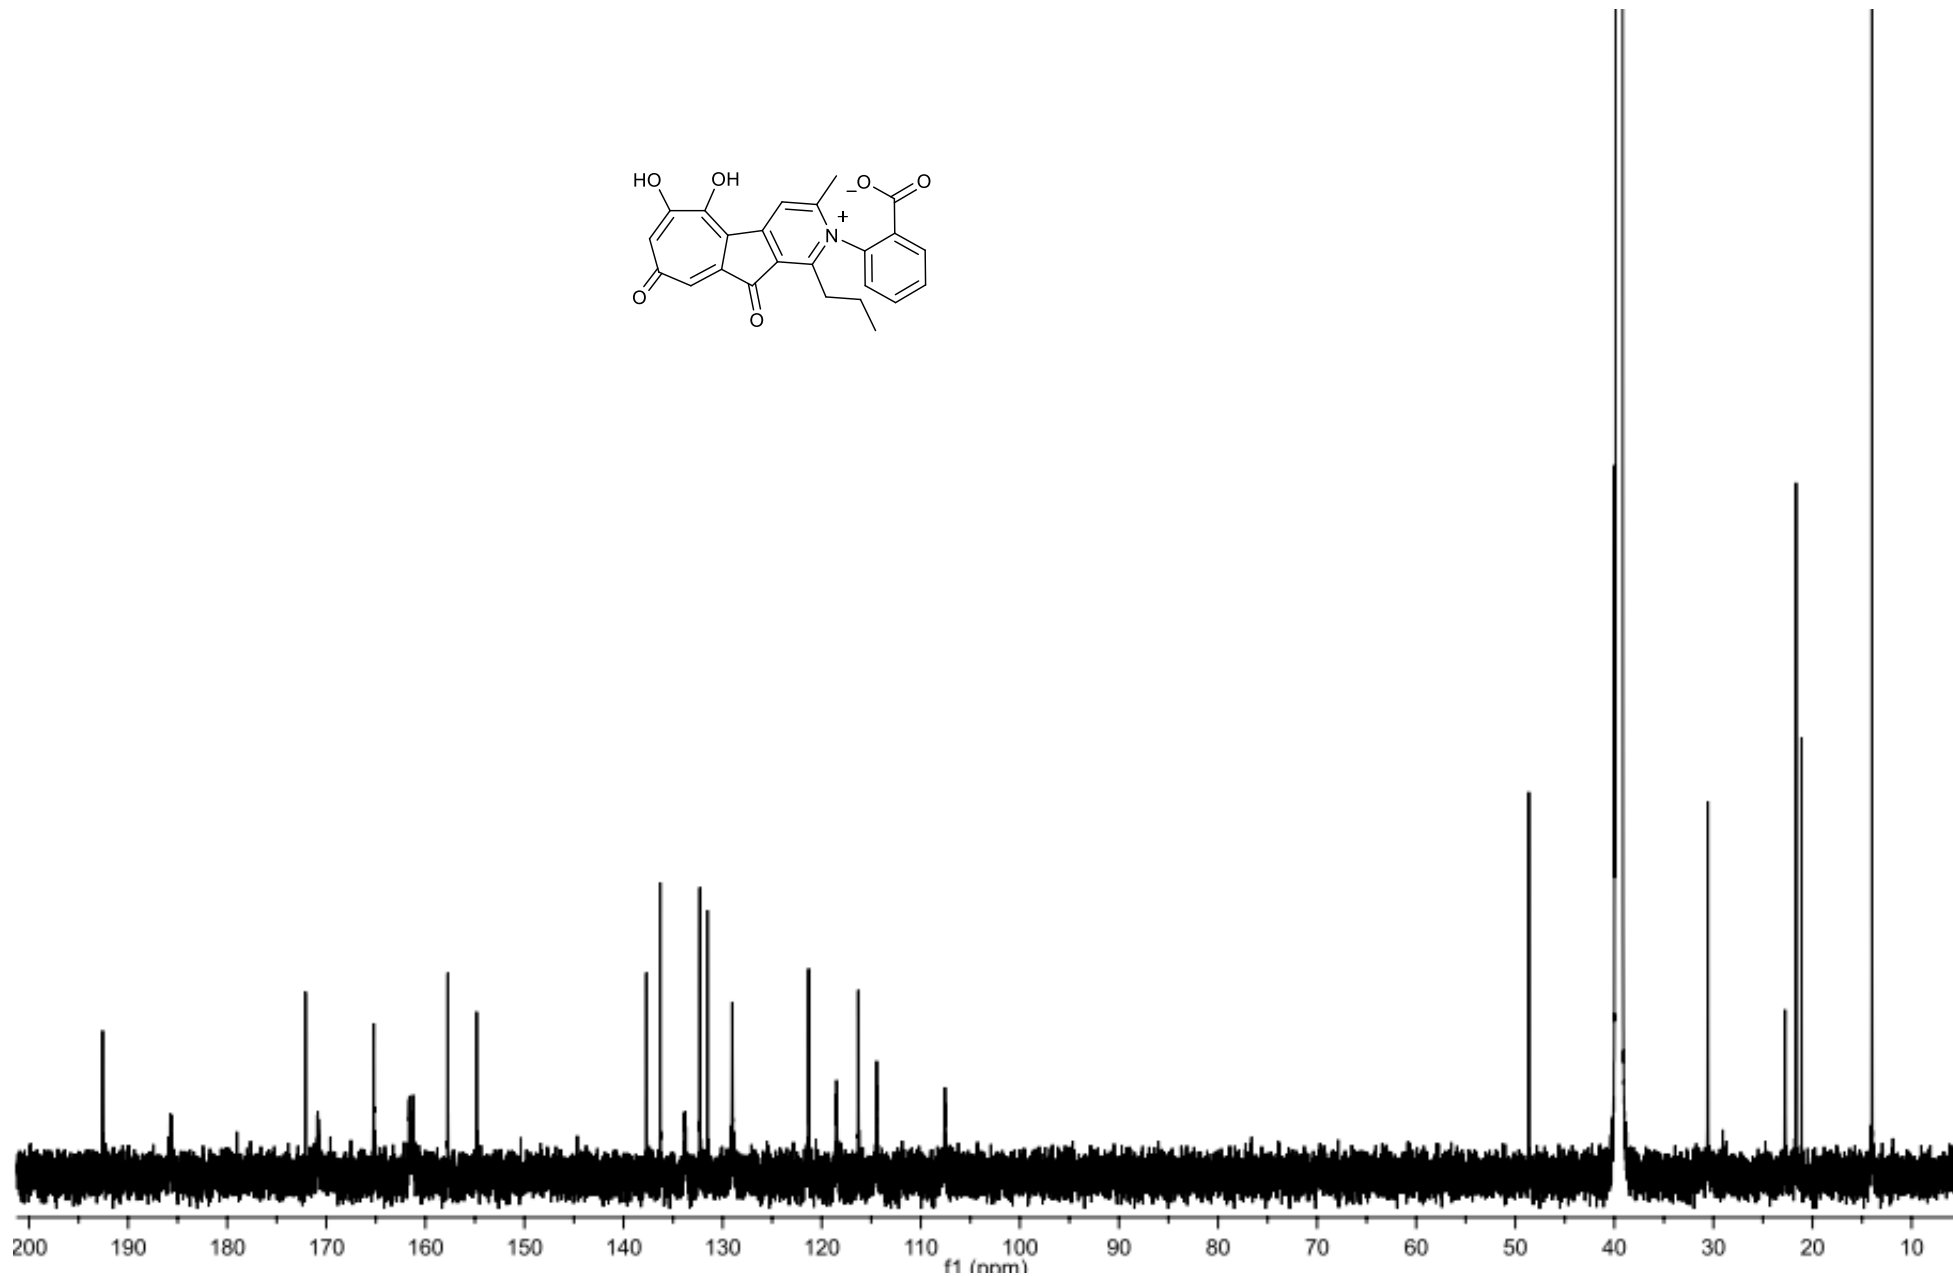

Supplementary Figure 53.  $^{13}\text{C}$  NMR spectrum of compound **8** in  $\text{DMSO-}d_6$ .

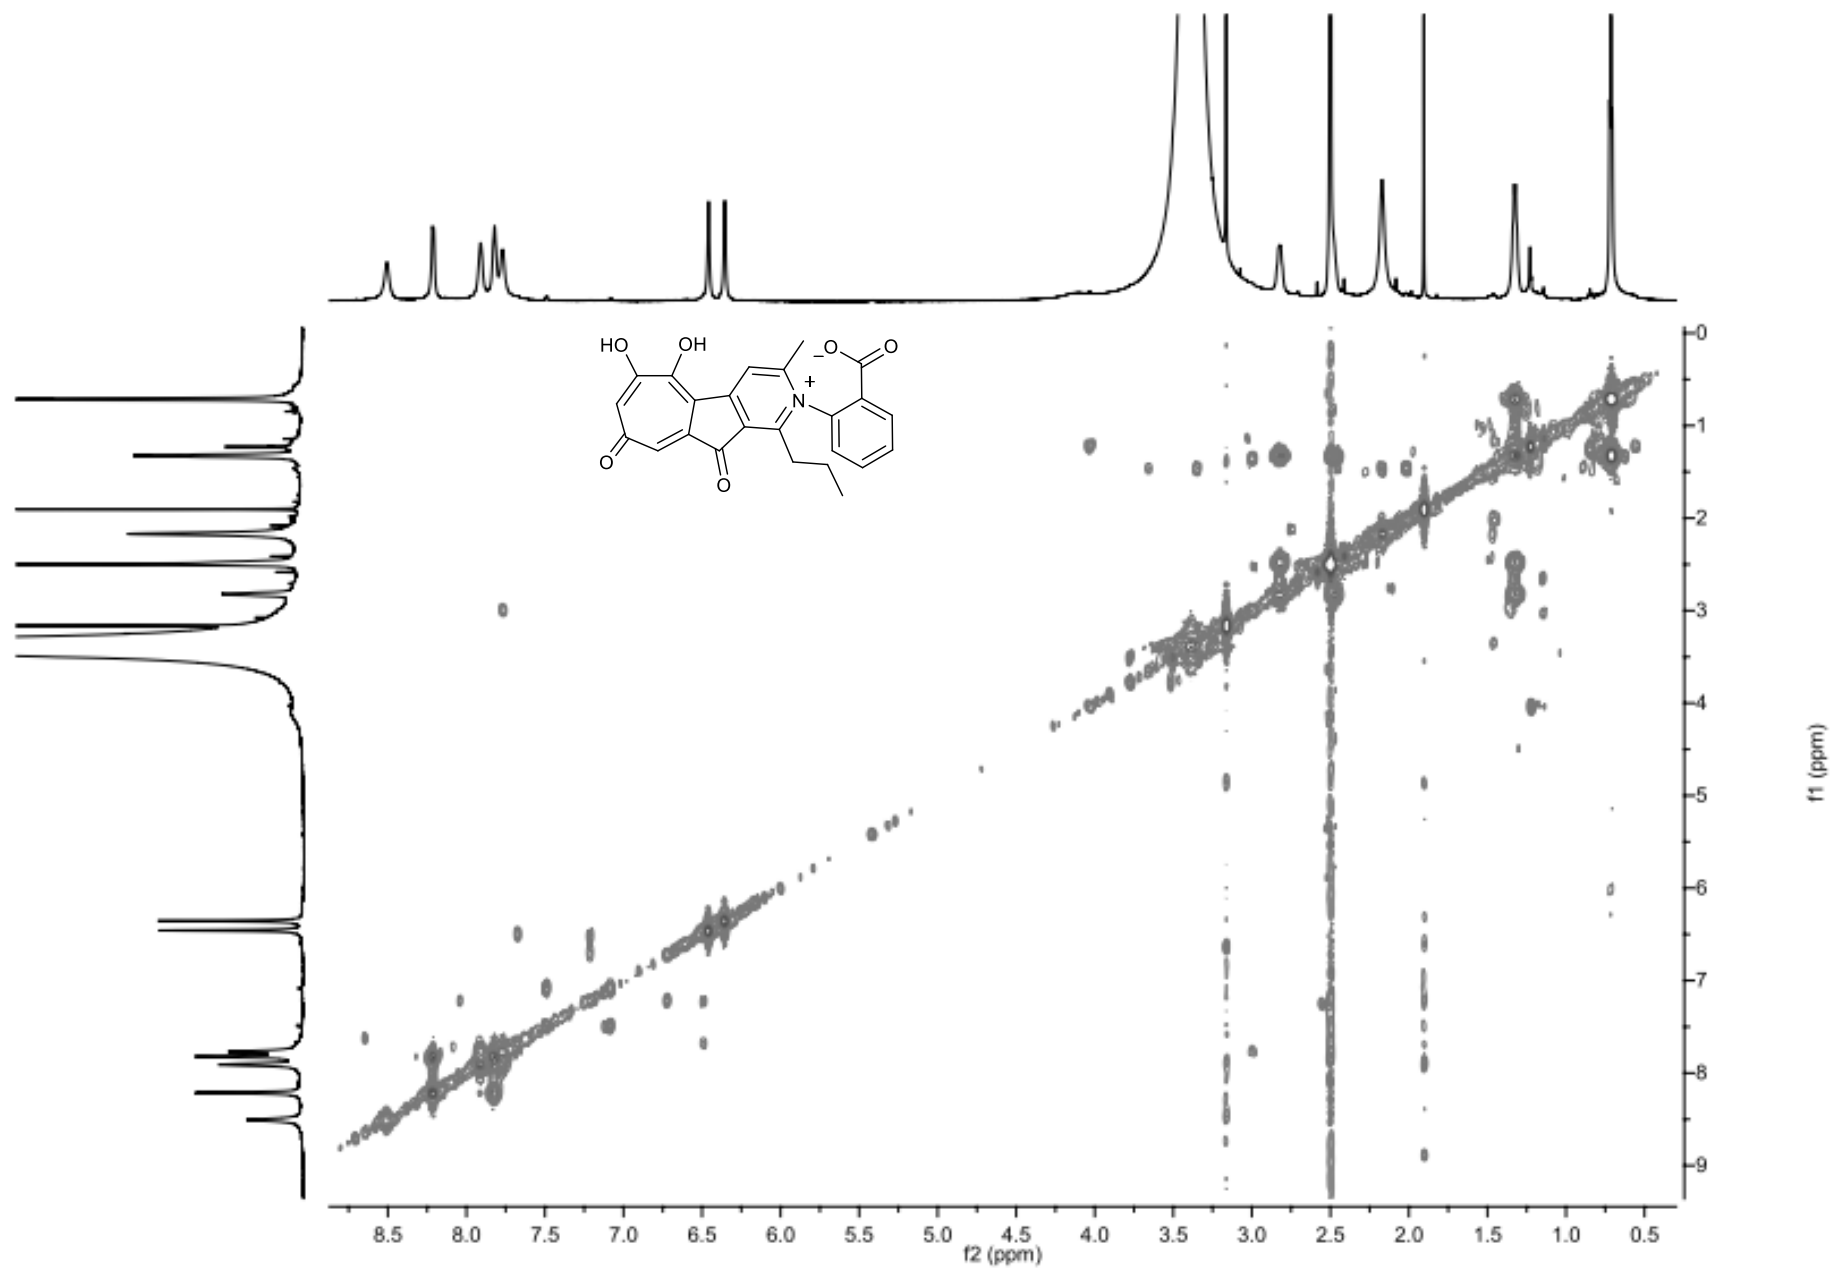

**Supplementary Figure 54.** <sup>1</sup>H-<sup>1</sup>H COSY NMR spectrum of compound **8** in DMSO-*d*<sub>6</sub>.

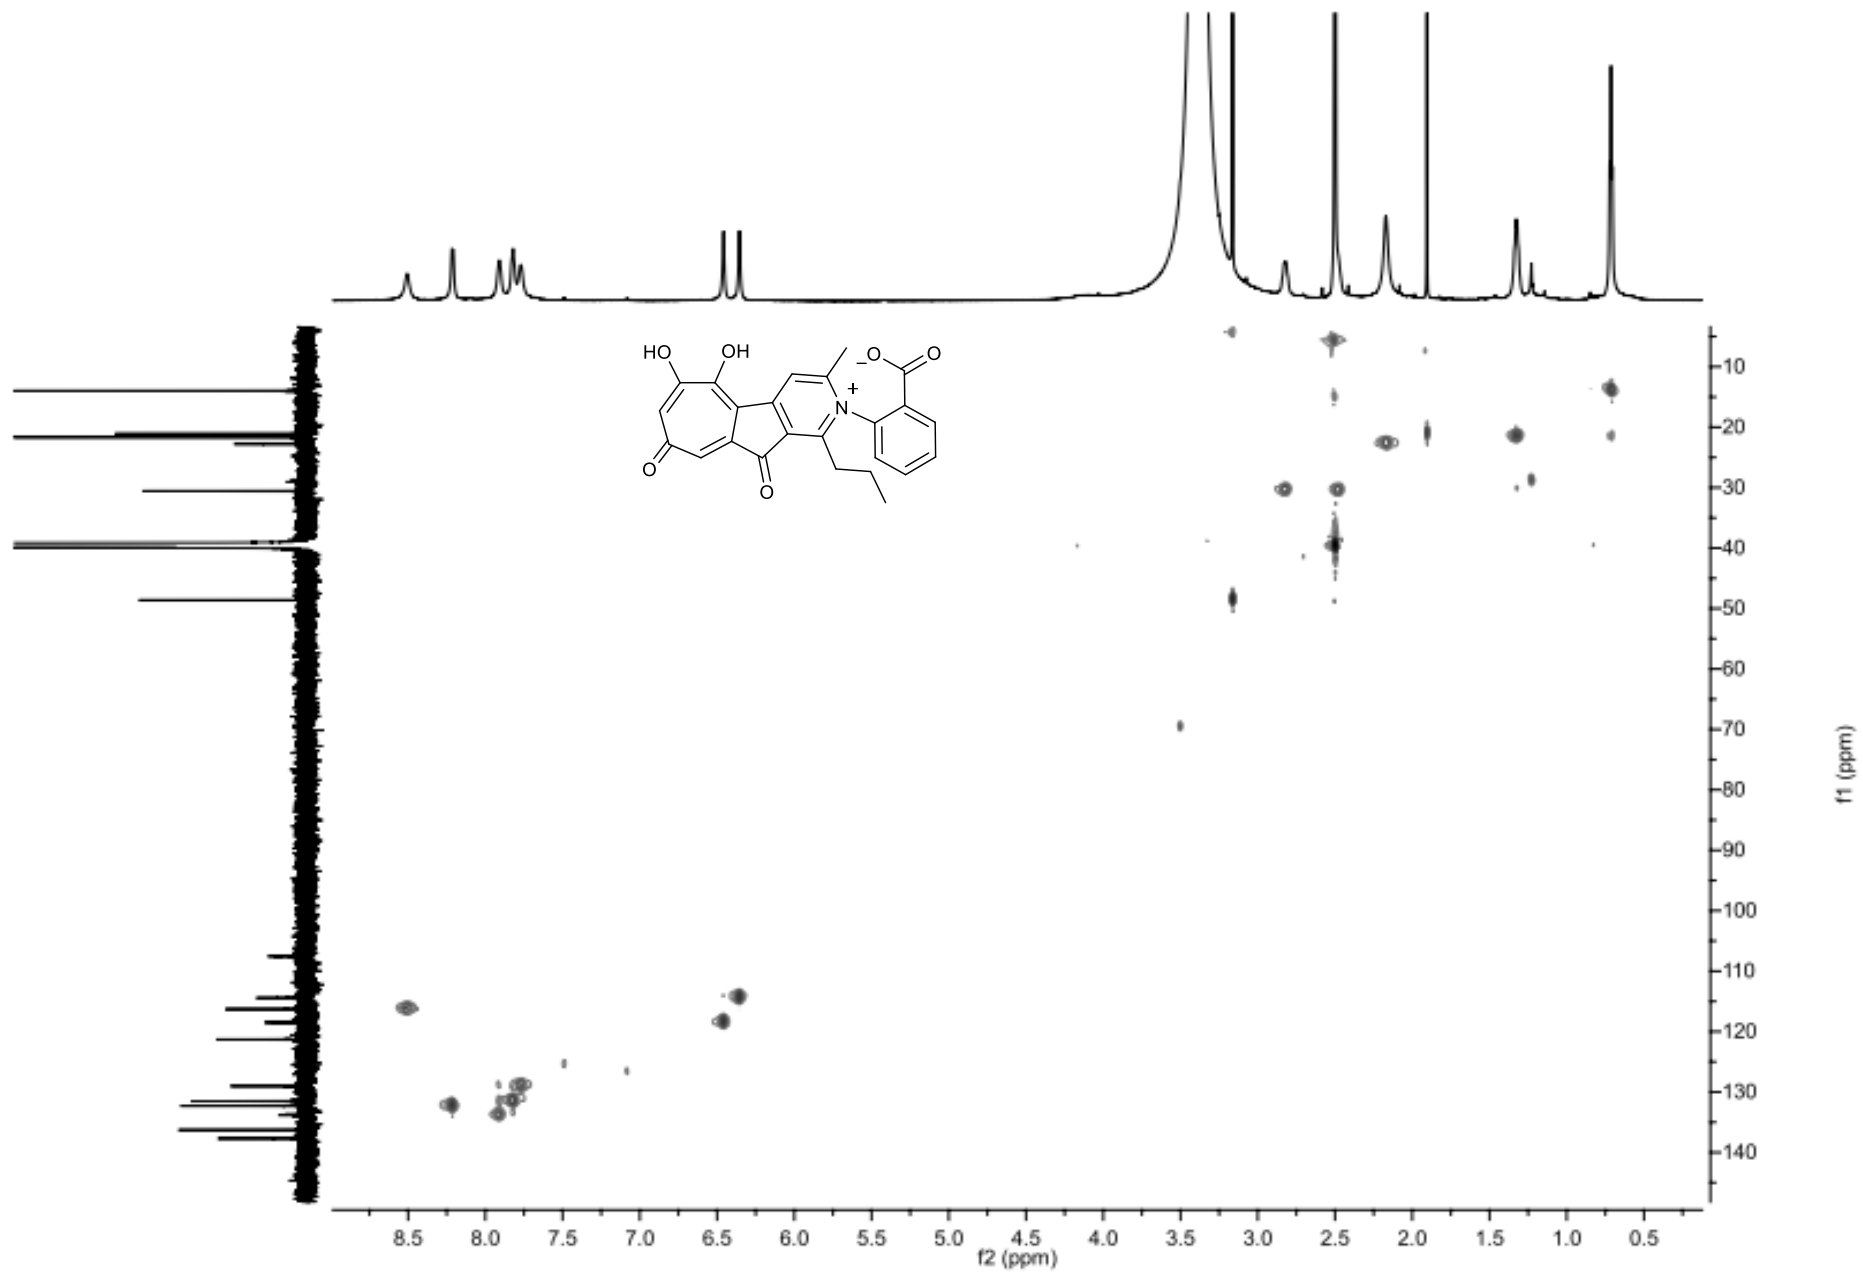

Supplementary Figure 55. HSQC NMR spectrum of compound 8 in DMSO-*d*<sub>6</sub>.

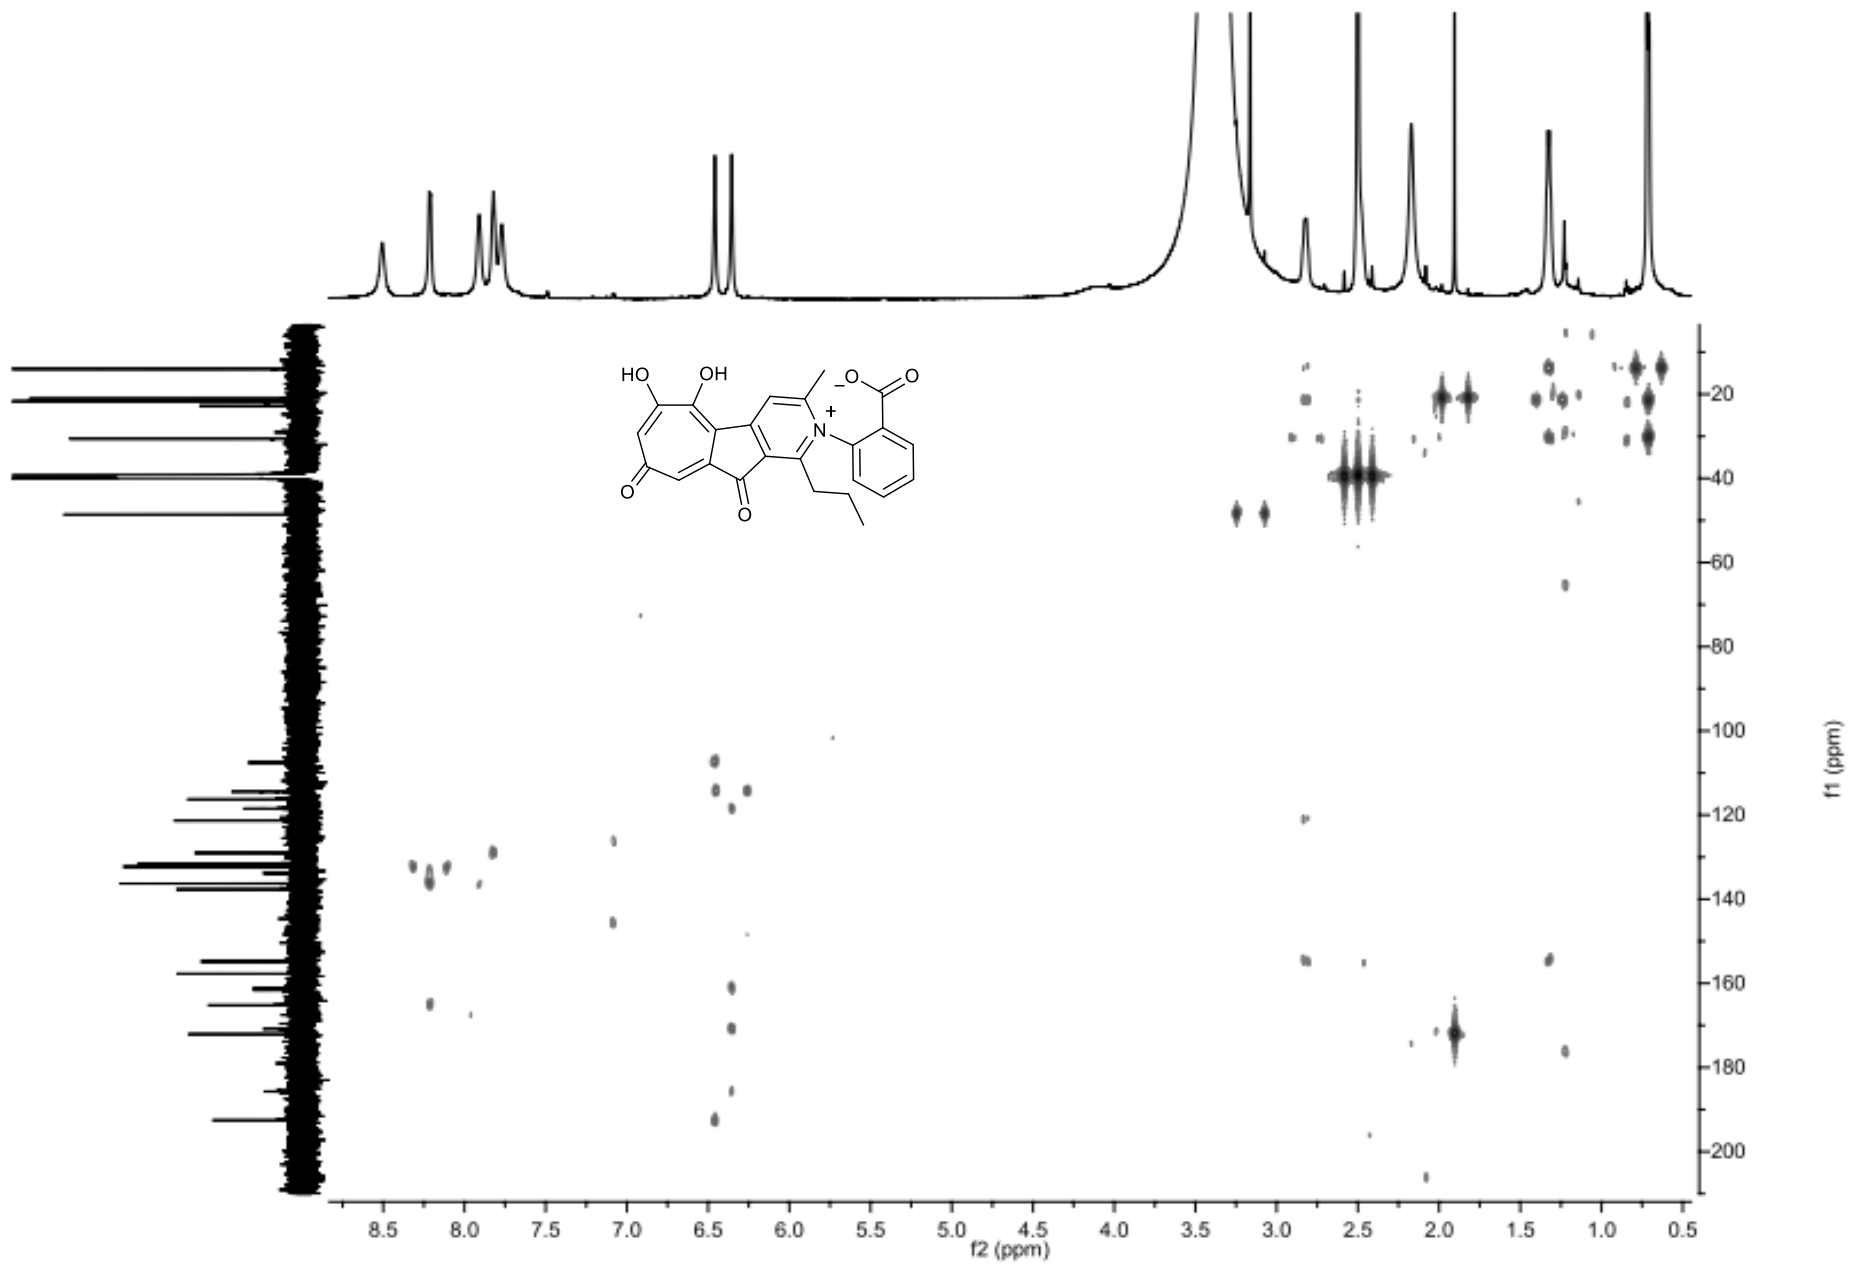

Supplementary Figure 56. HMBC NMR spectrum of compound 8 in DMSO-*d*<sub>6</sub>.



# User Spectra

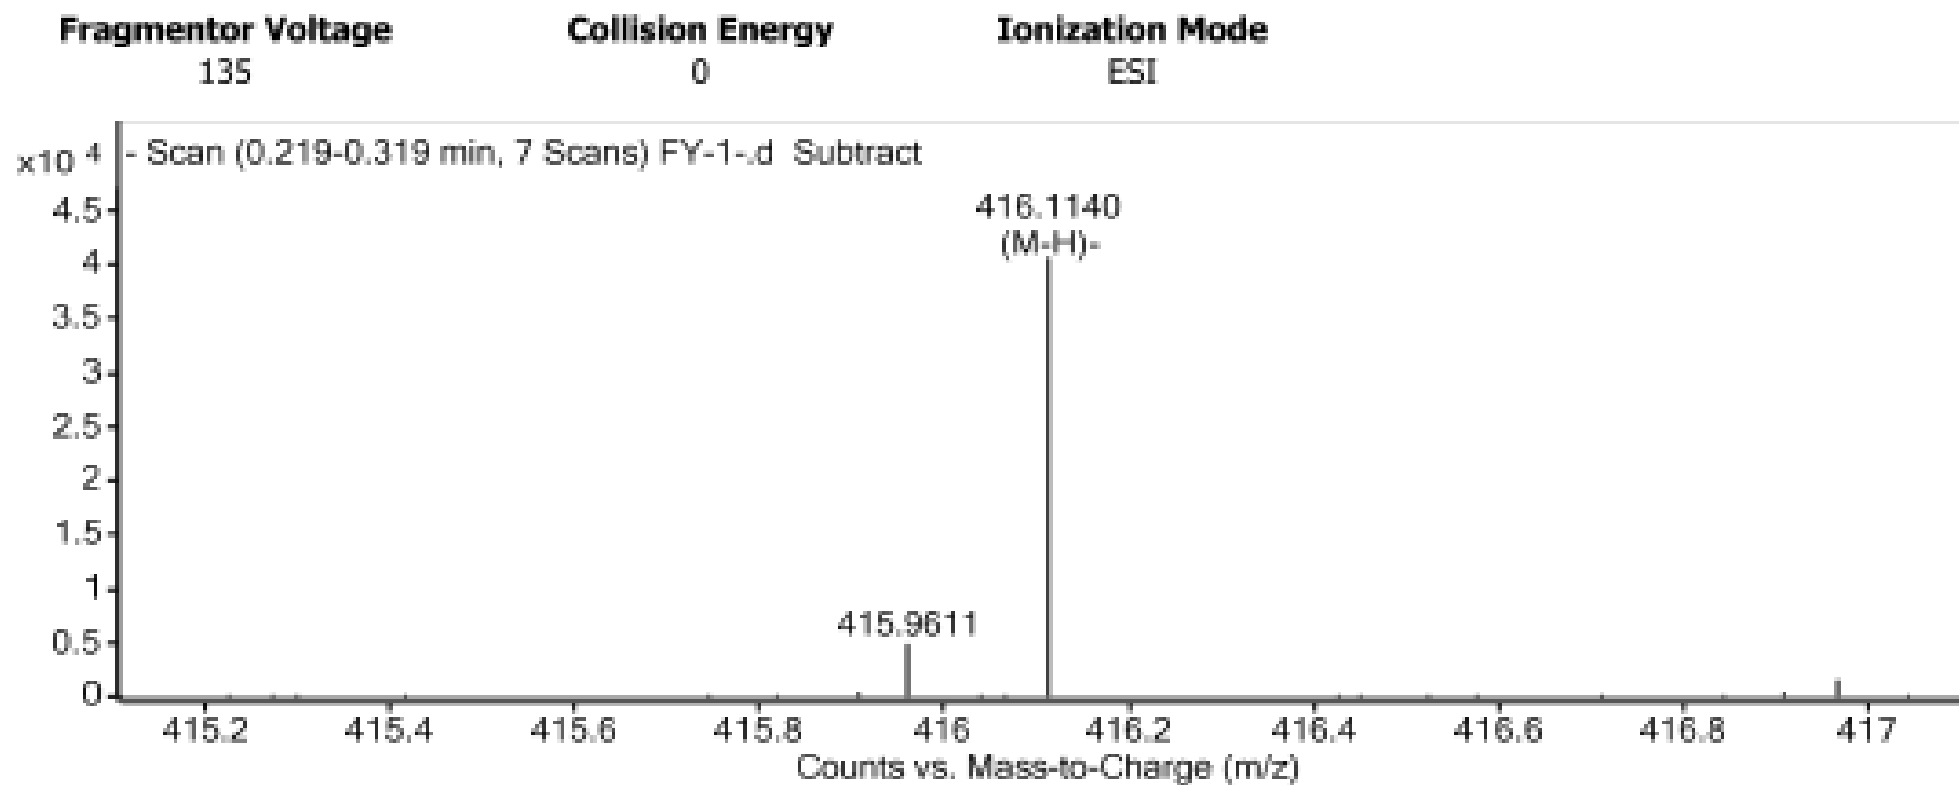

Supplementary Figure 57. HRESIMS analysis of compound 8.

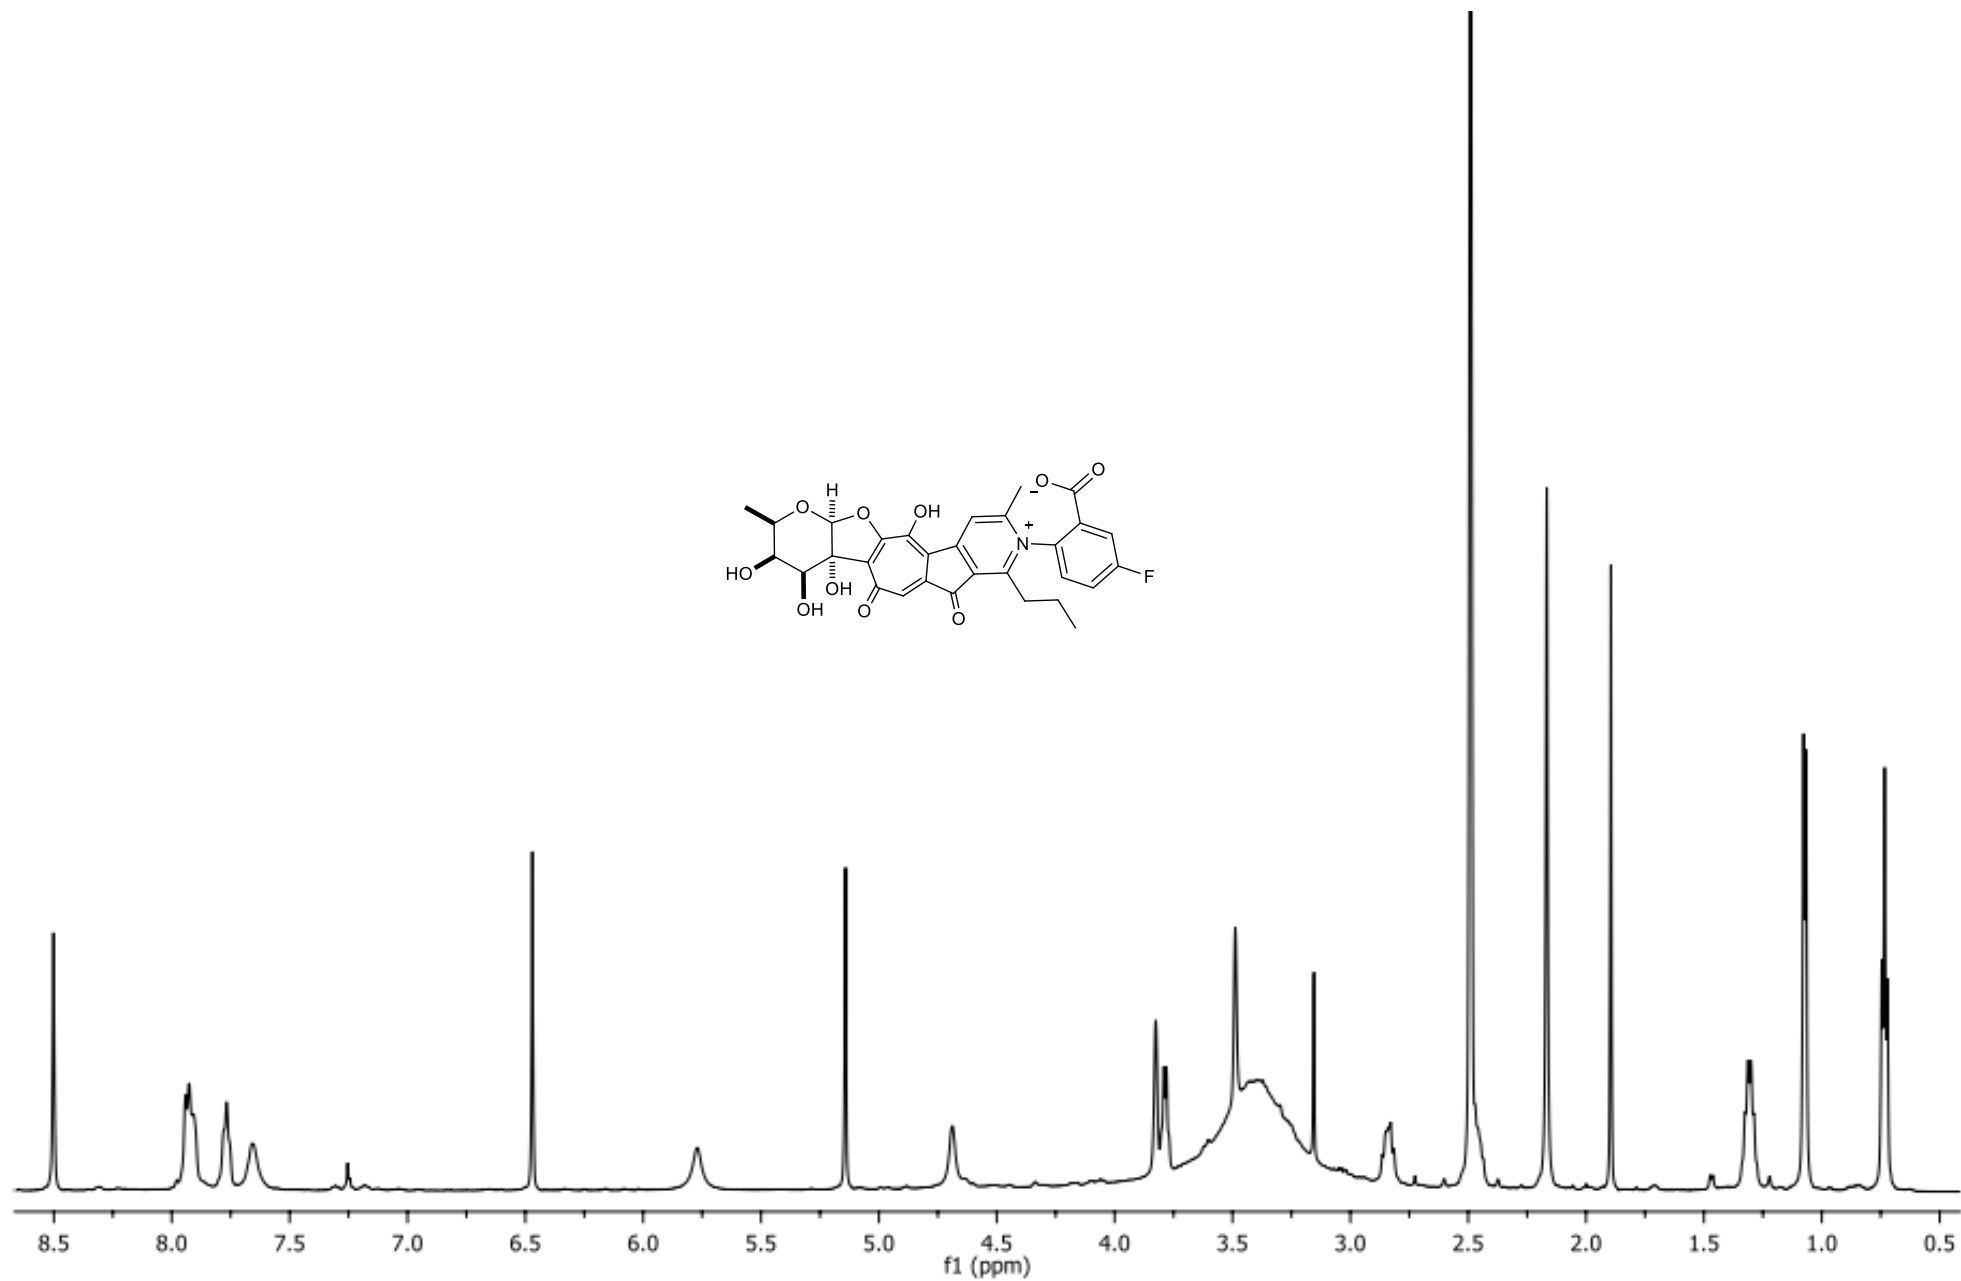

**Supplementary Figure 58.** <sup>1</sup>H NMR spectrum of compound **10** in DMSO-d<sub>6</sub>.

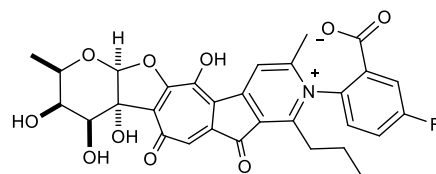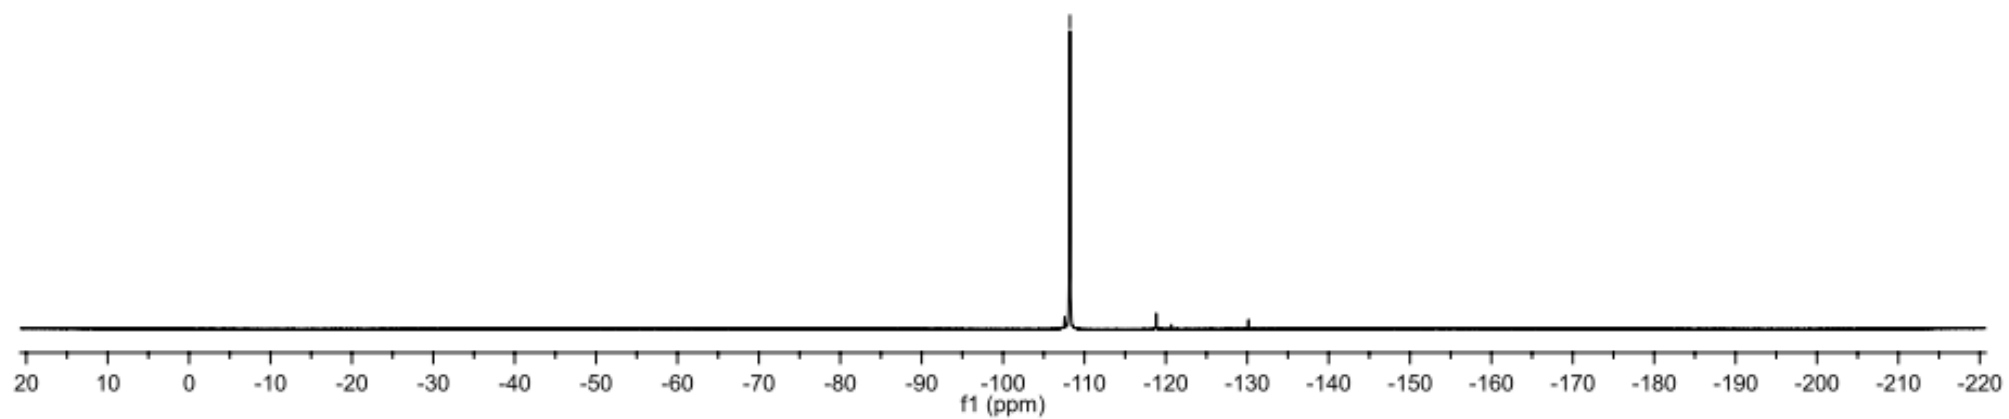

**Supplementary Figure 59.**  $^{19}\text{F}$  NMR spectrum of compound **10** in  $\text{DMSO-}d_6$ .

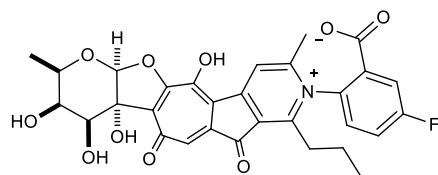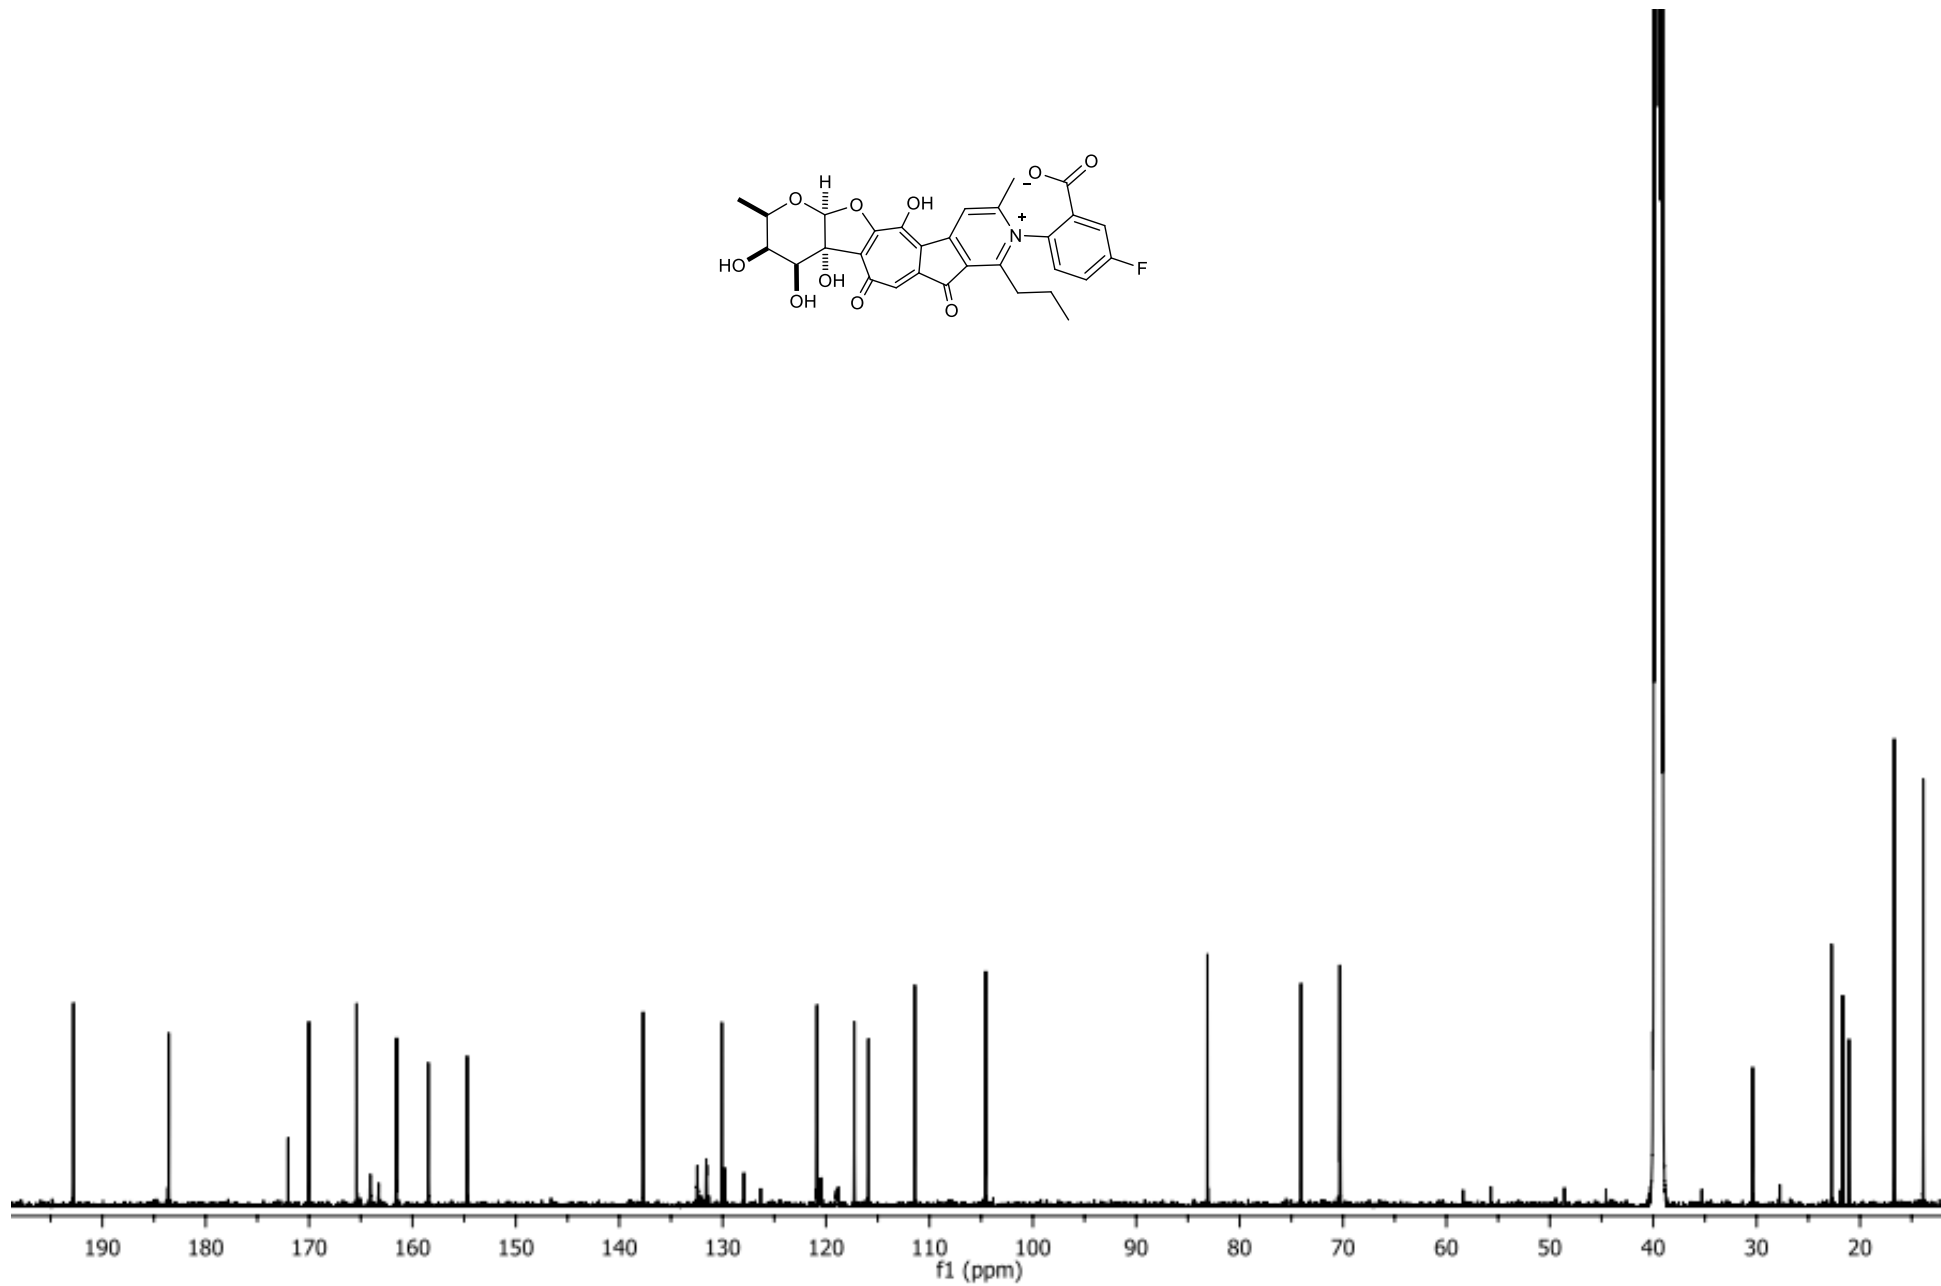

Supplementary Figure 60. <sup>13</sup>C NMR spectrum of compound 10 in DMSO-*d*<sub>6</sub>.

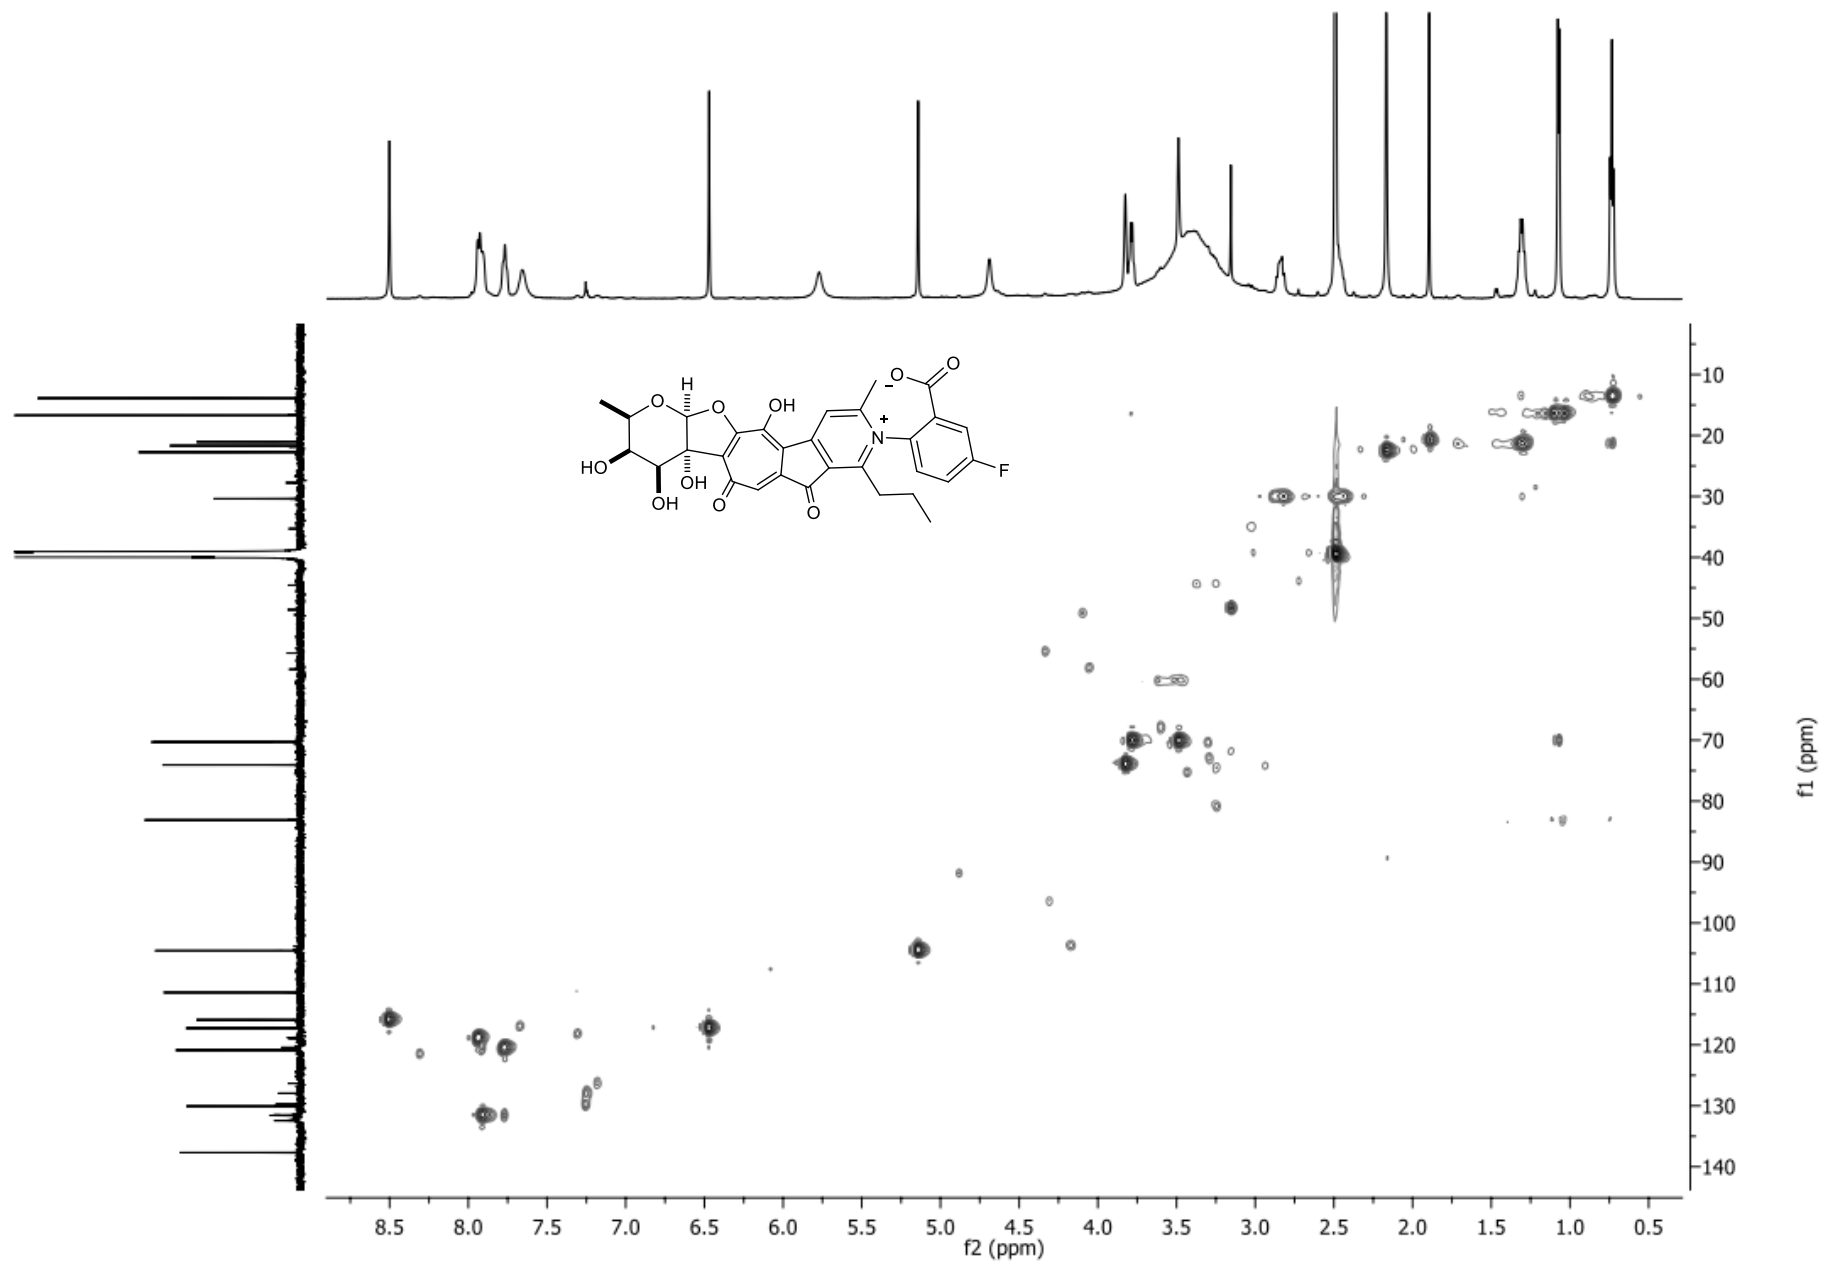

Supplementary Figure 61. HSQC NMR spectrum of compound 10 in DMSO-*d*<sub>6</sub>.

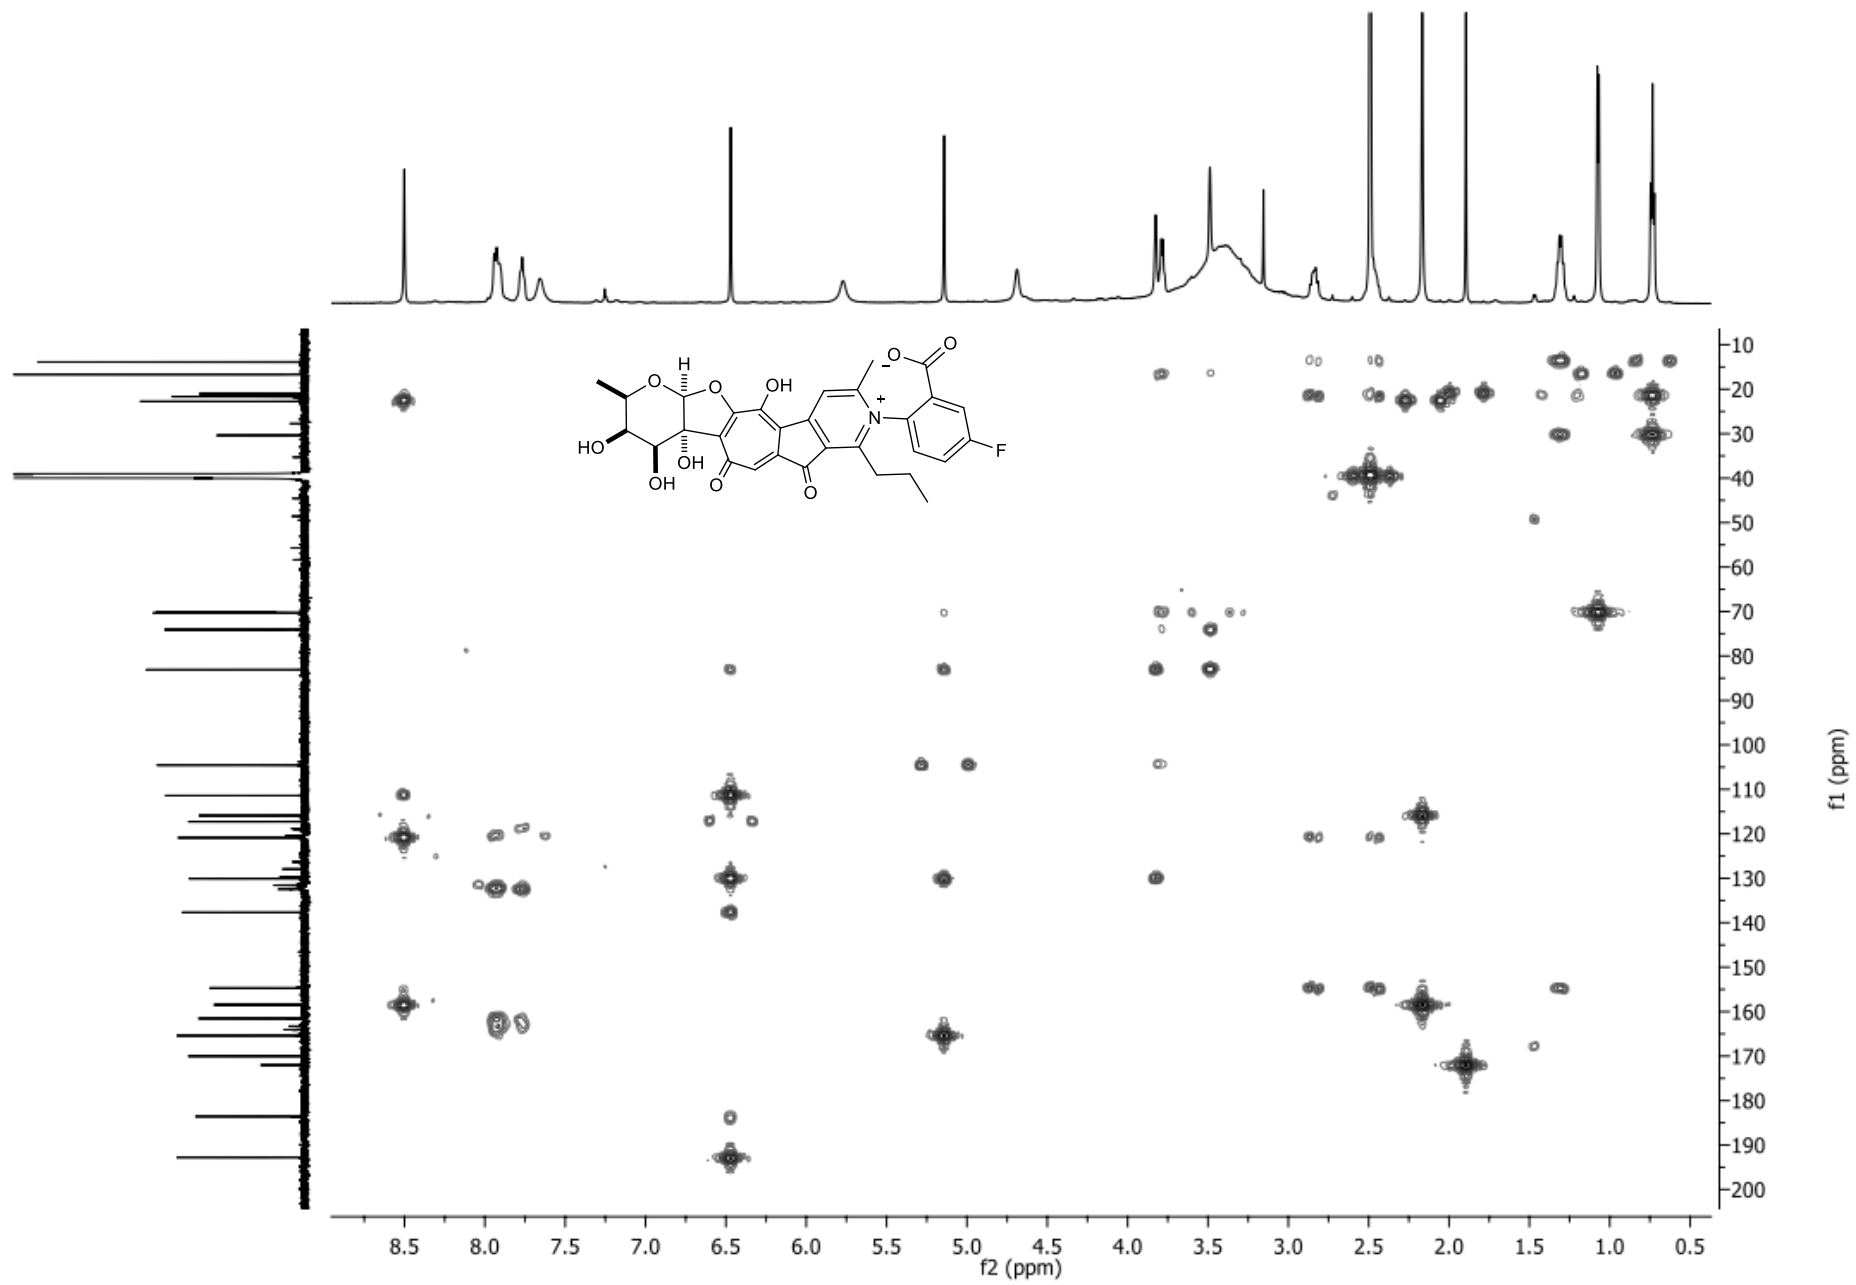

Supplementary Figure 62. HMBC NMR spectrum of compound **10** in DMSO- $d_6$ .

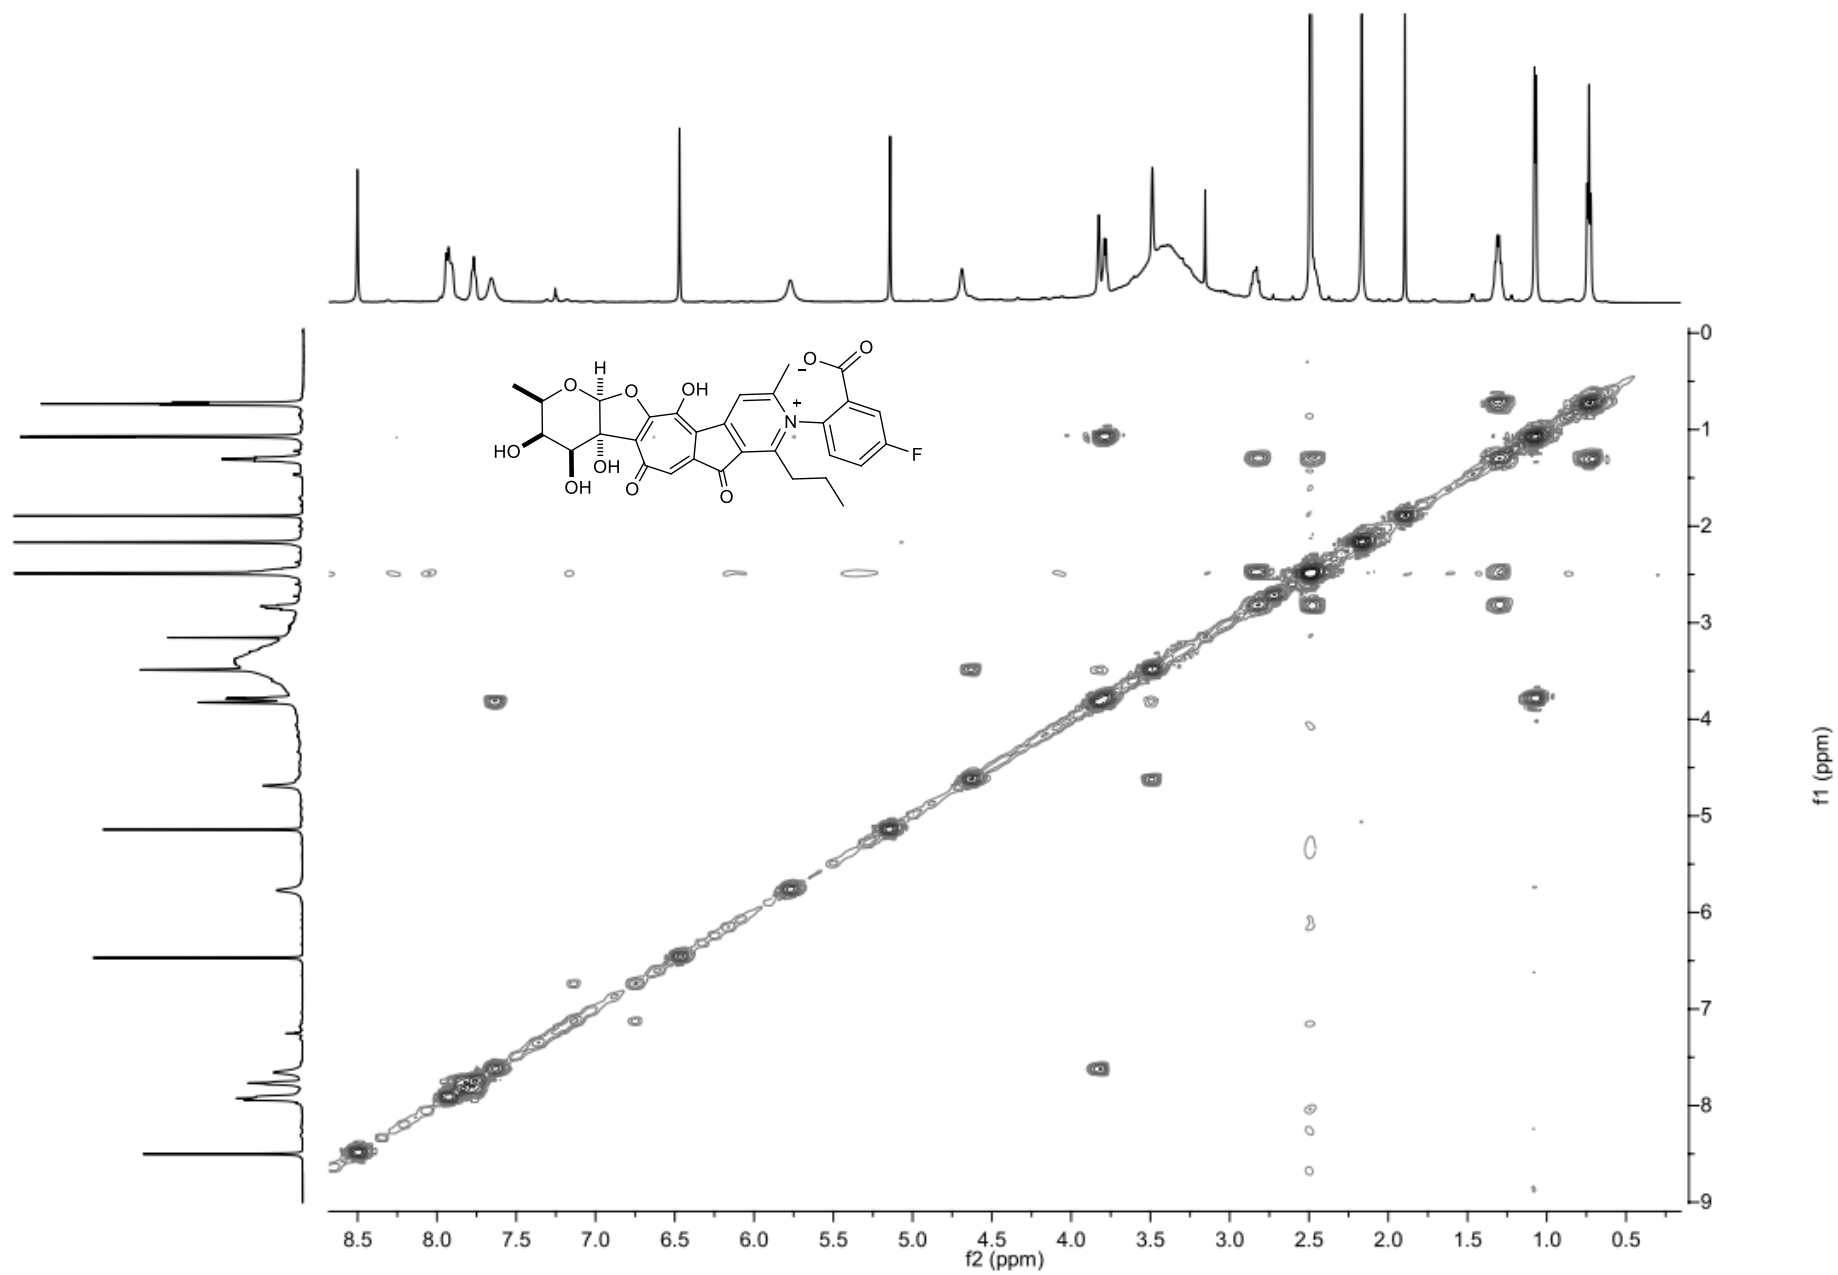

**Supplementary Figure 63.**  $^1\text{H}$ - $^1\text{H}$  COSY NMR spectrum of compound **10** in  $\text{DMSO-}d_6$ .

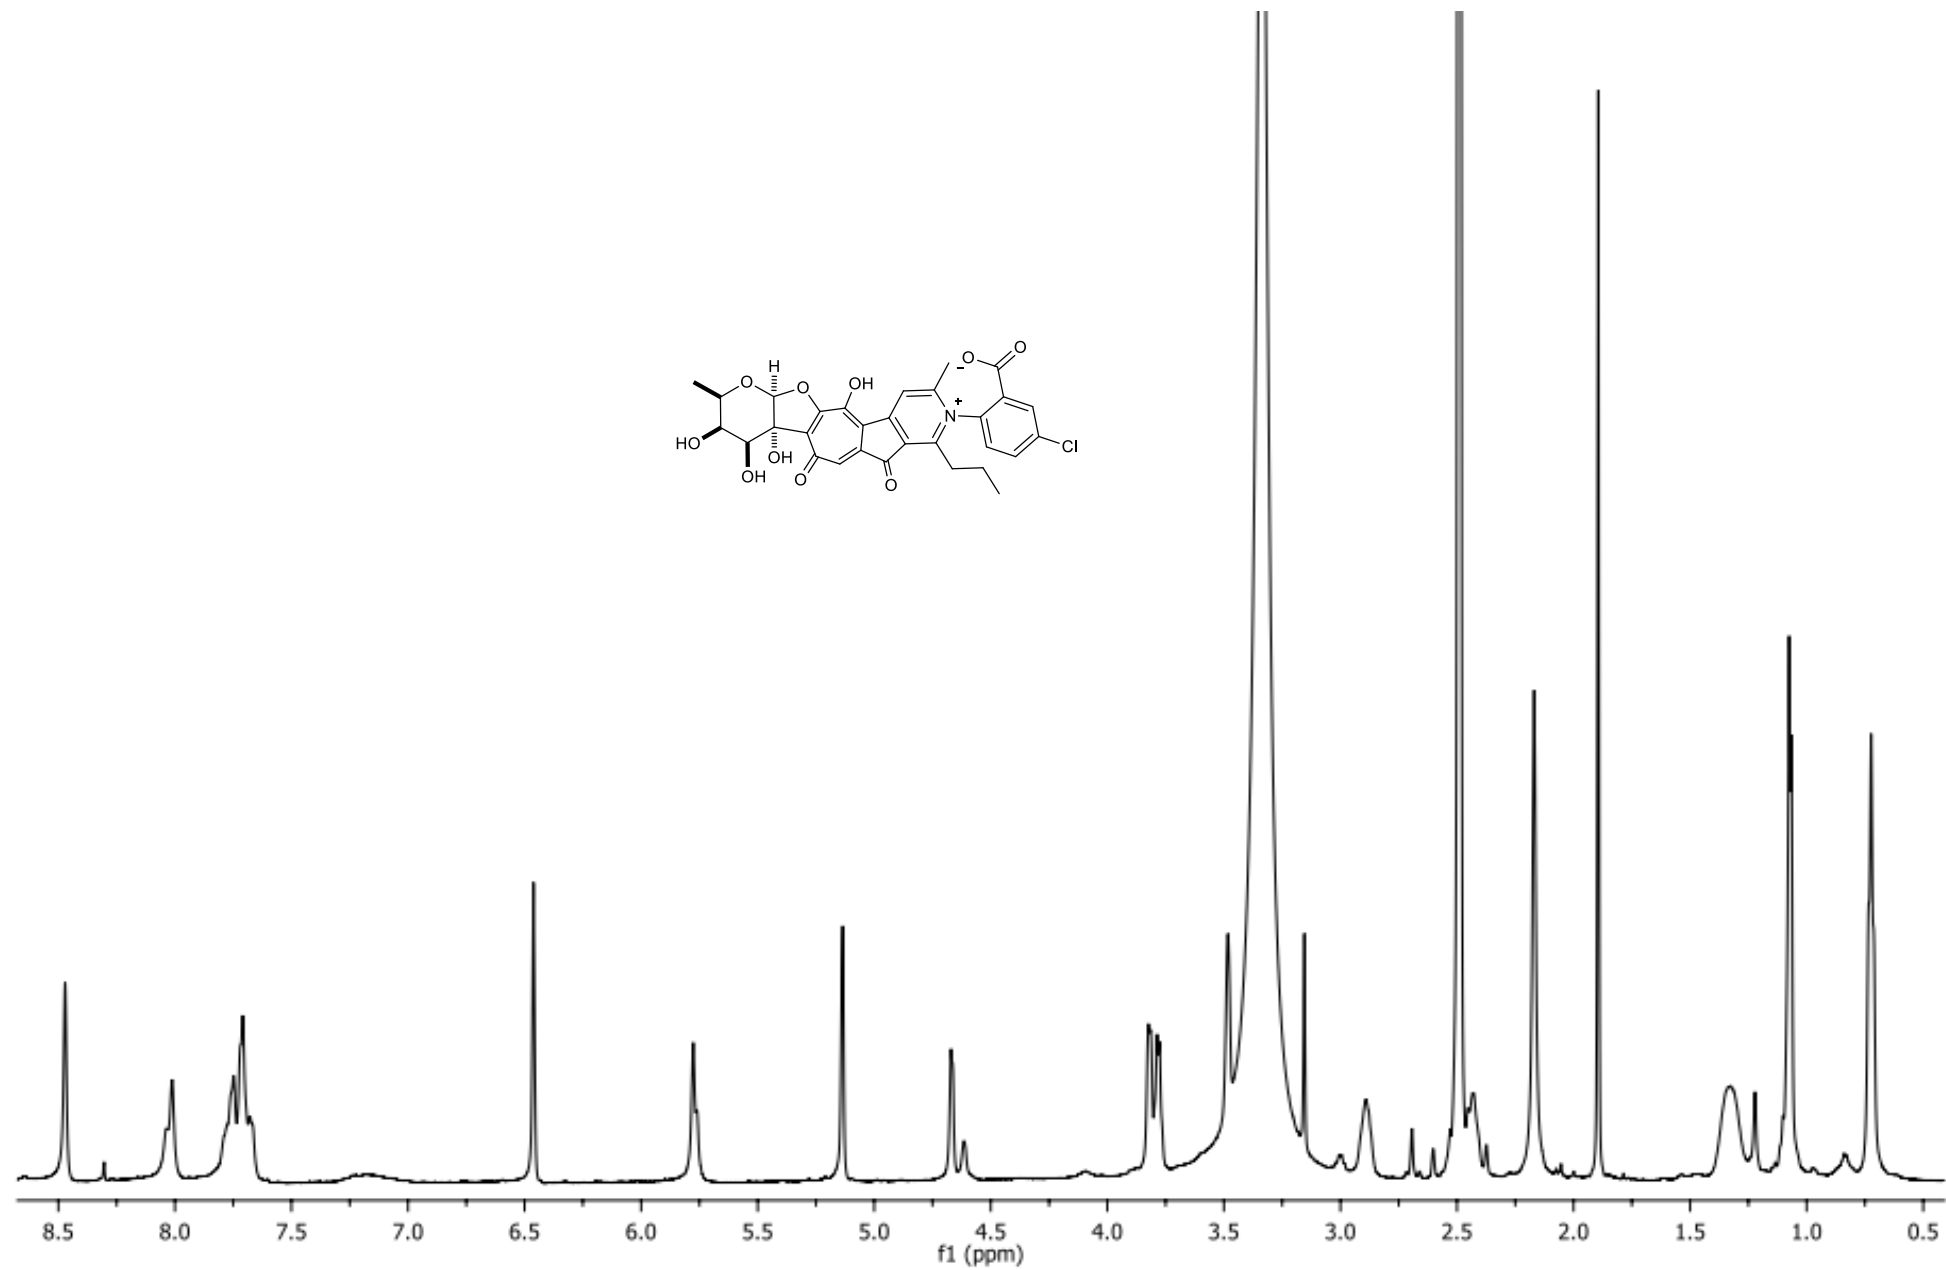

**Supplementary Figure 64.** <sup>1</sup>H NMR spectrum of compound 11 in DMSO-*d*<sub>6</sub>.



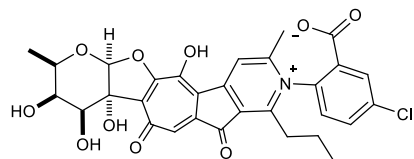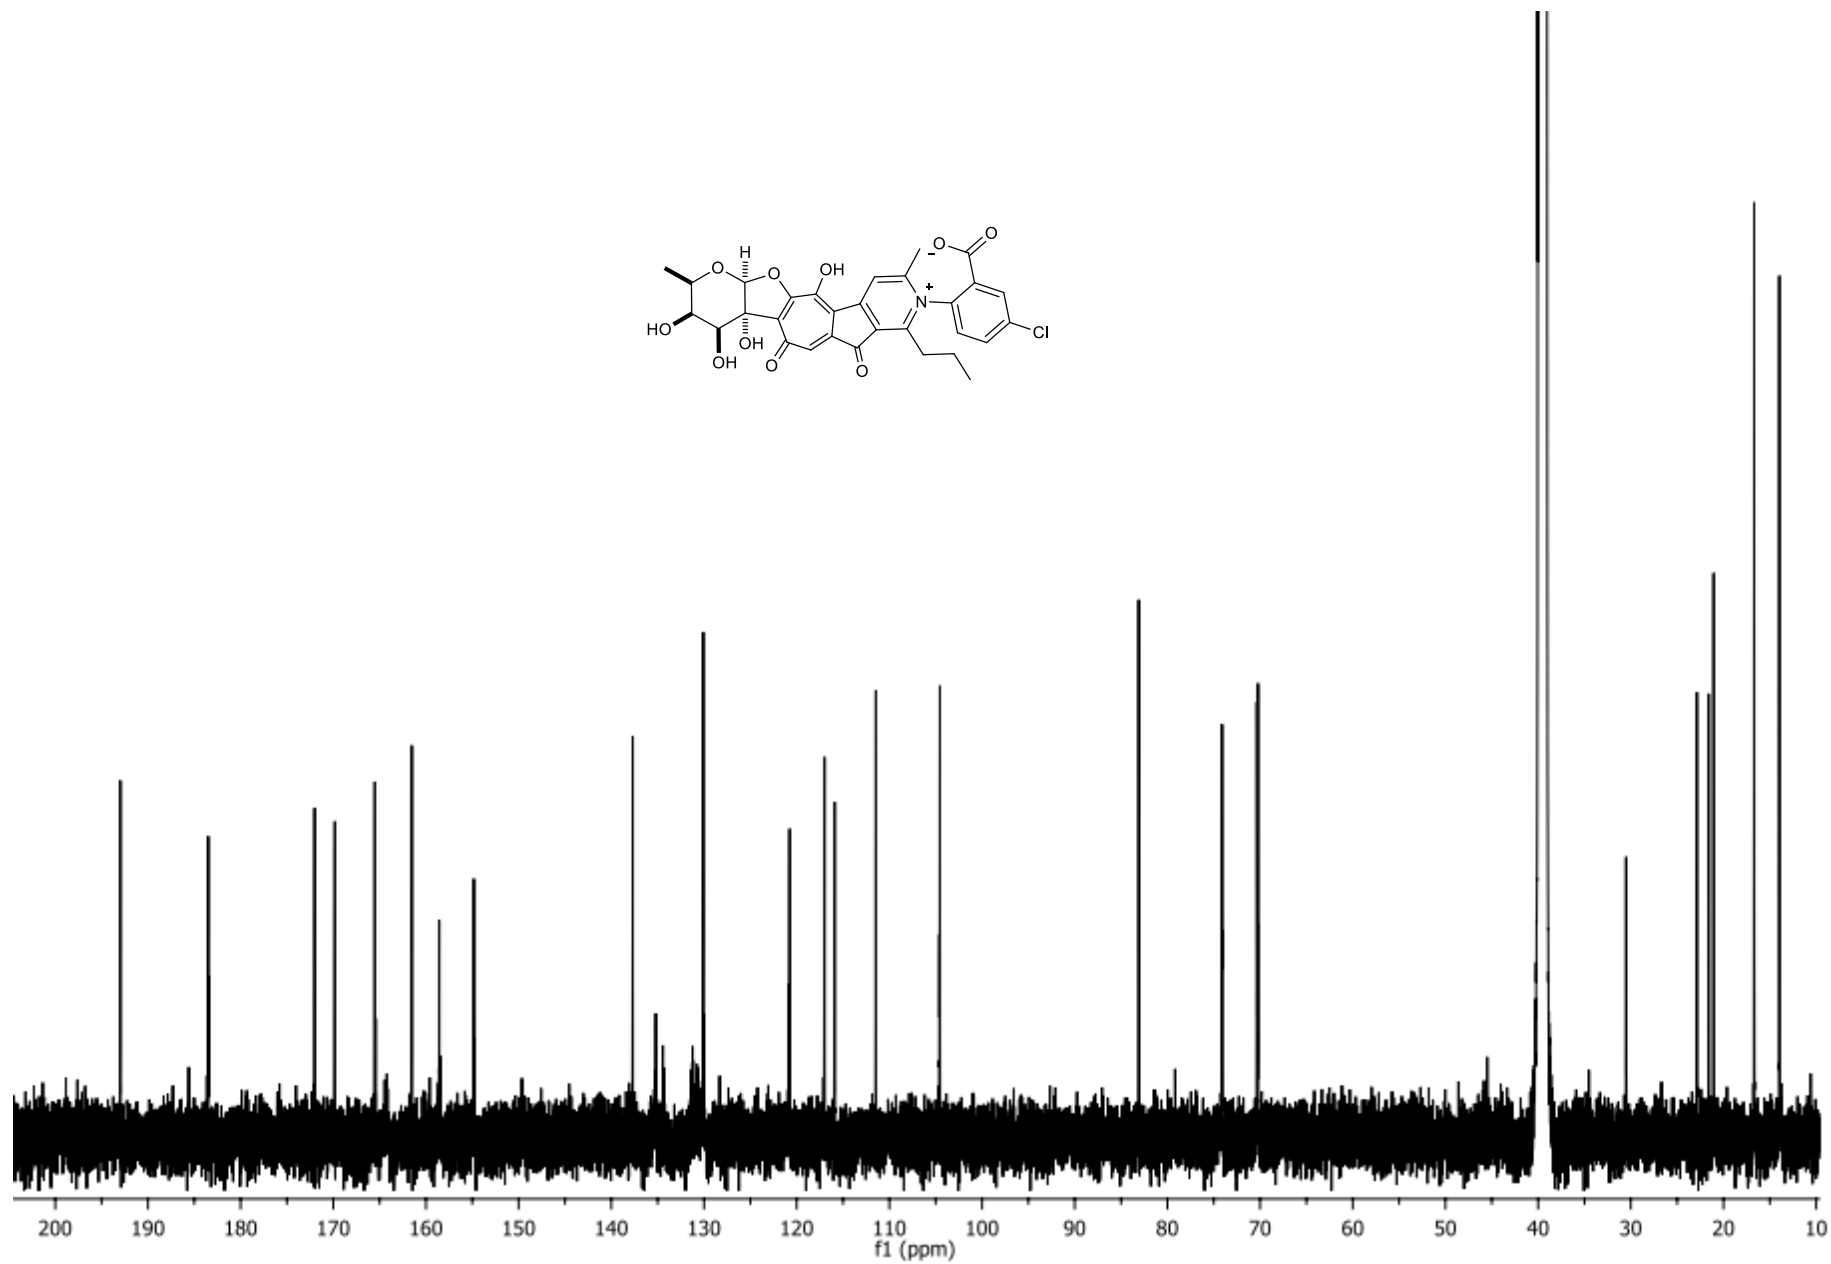

Supplementary Figure 65. <sup>13</sup>C NMR spectrum of compound 11 in DMSO-*d*<sub>6</sub>.

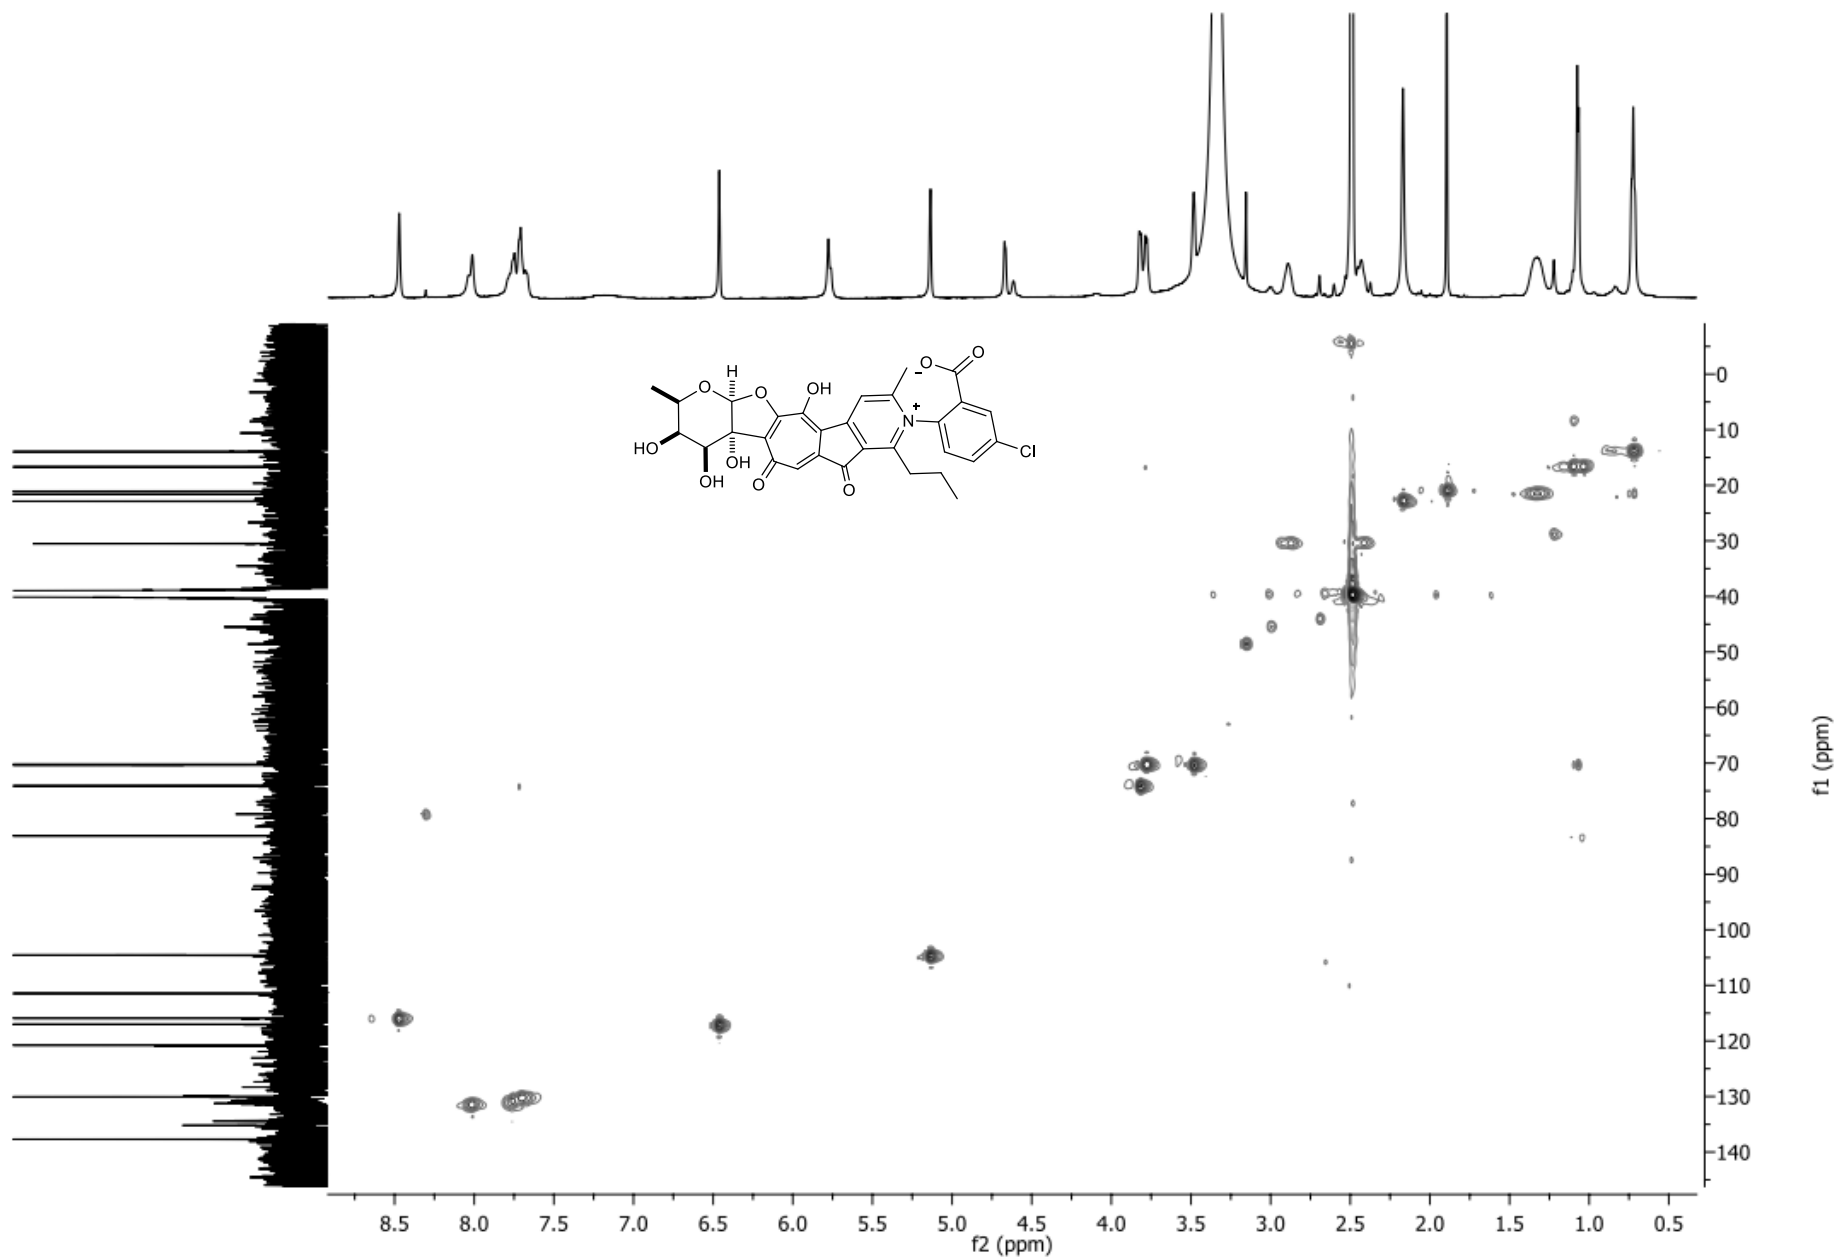

Supplementary Figure 66. HSQC NMR spectrum of compound 11 in DMSO-*d*<sub>6</sub>.

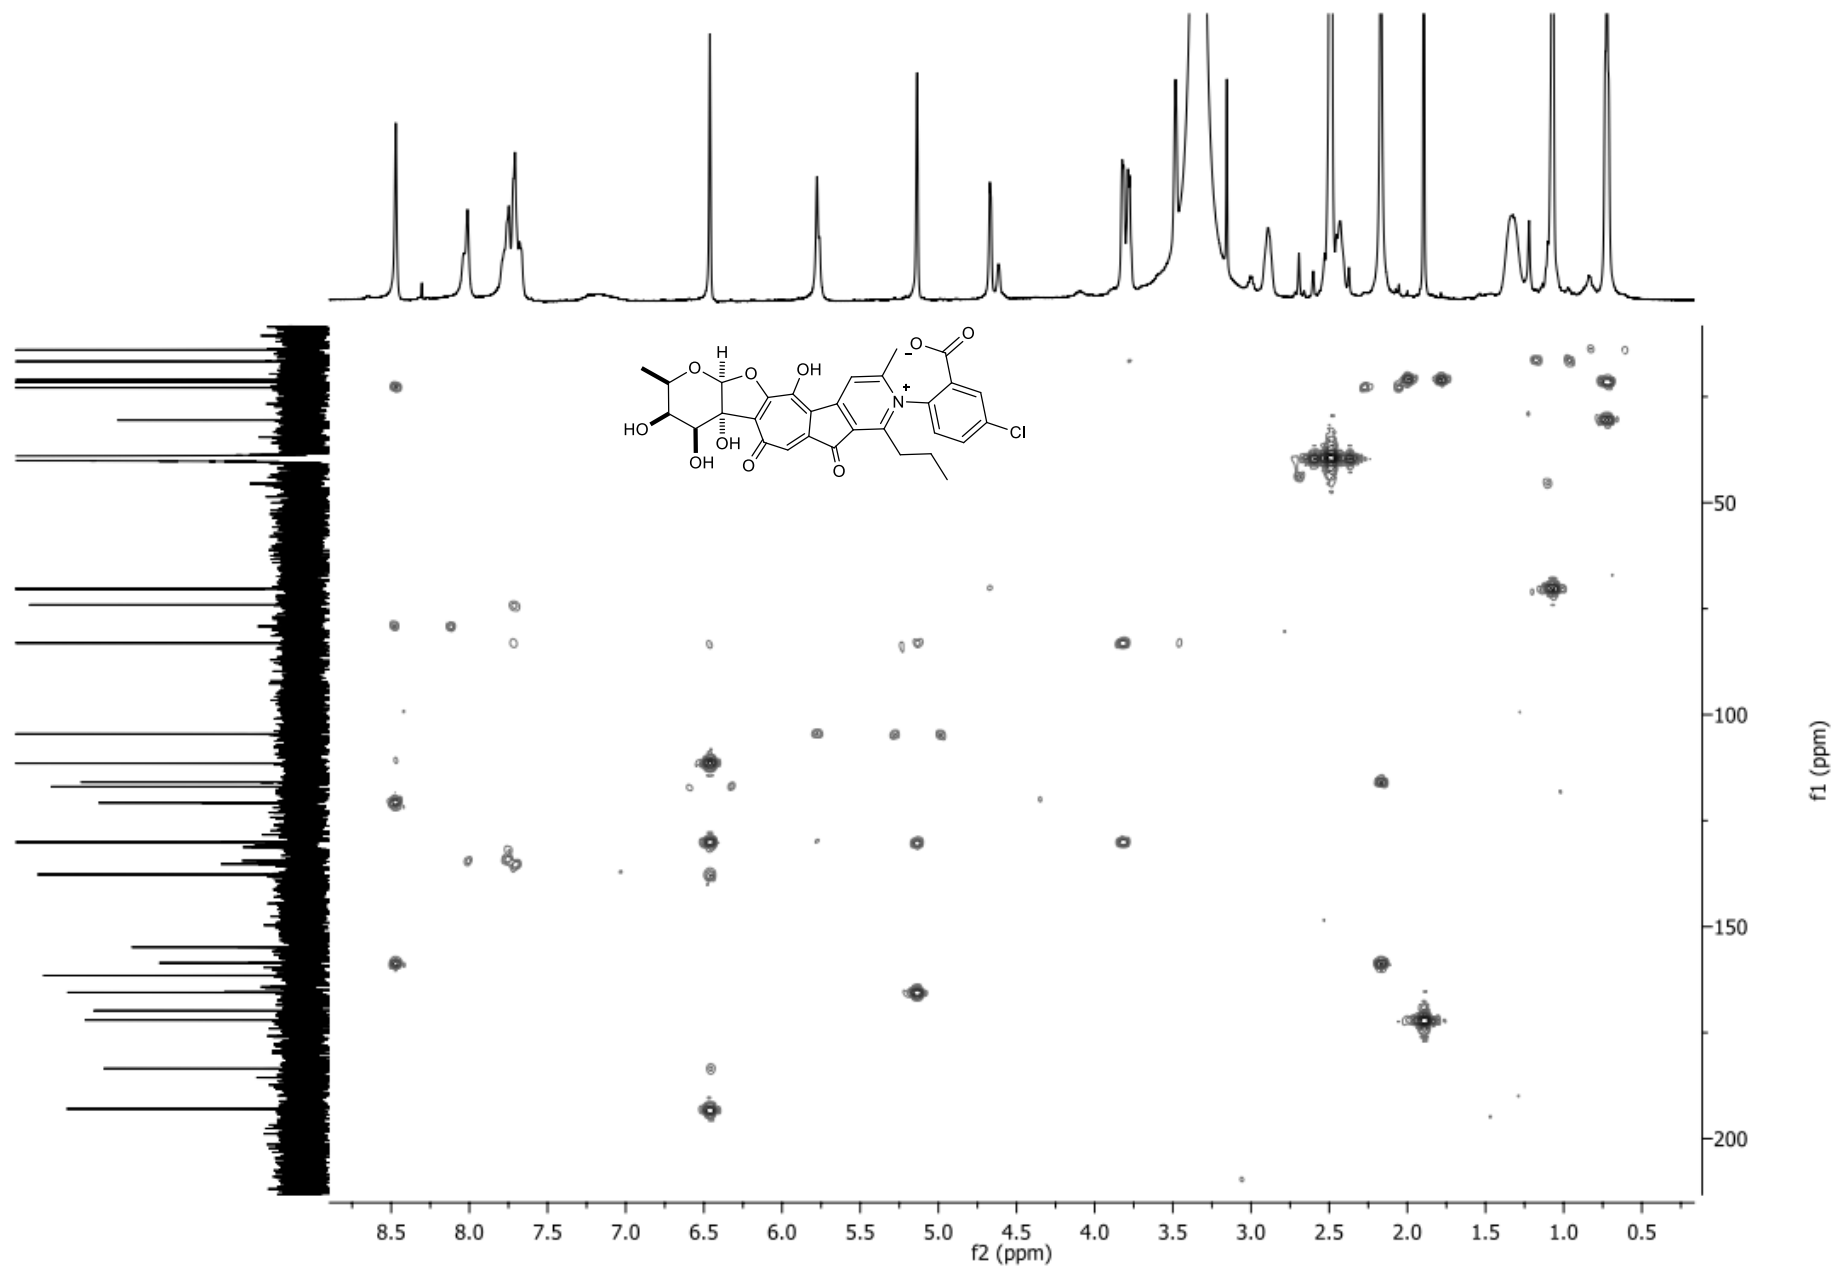

Supplementary Figure 67. HMBC NMR spectrum of compound 11 in DMSO-*d*<sub>6</sub>.

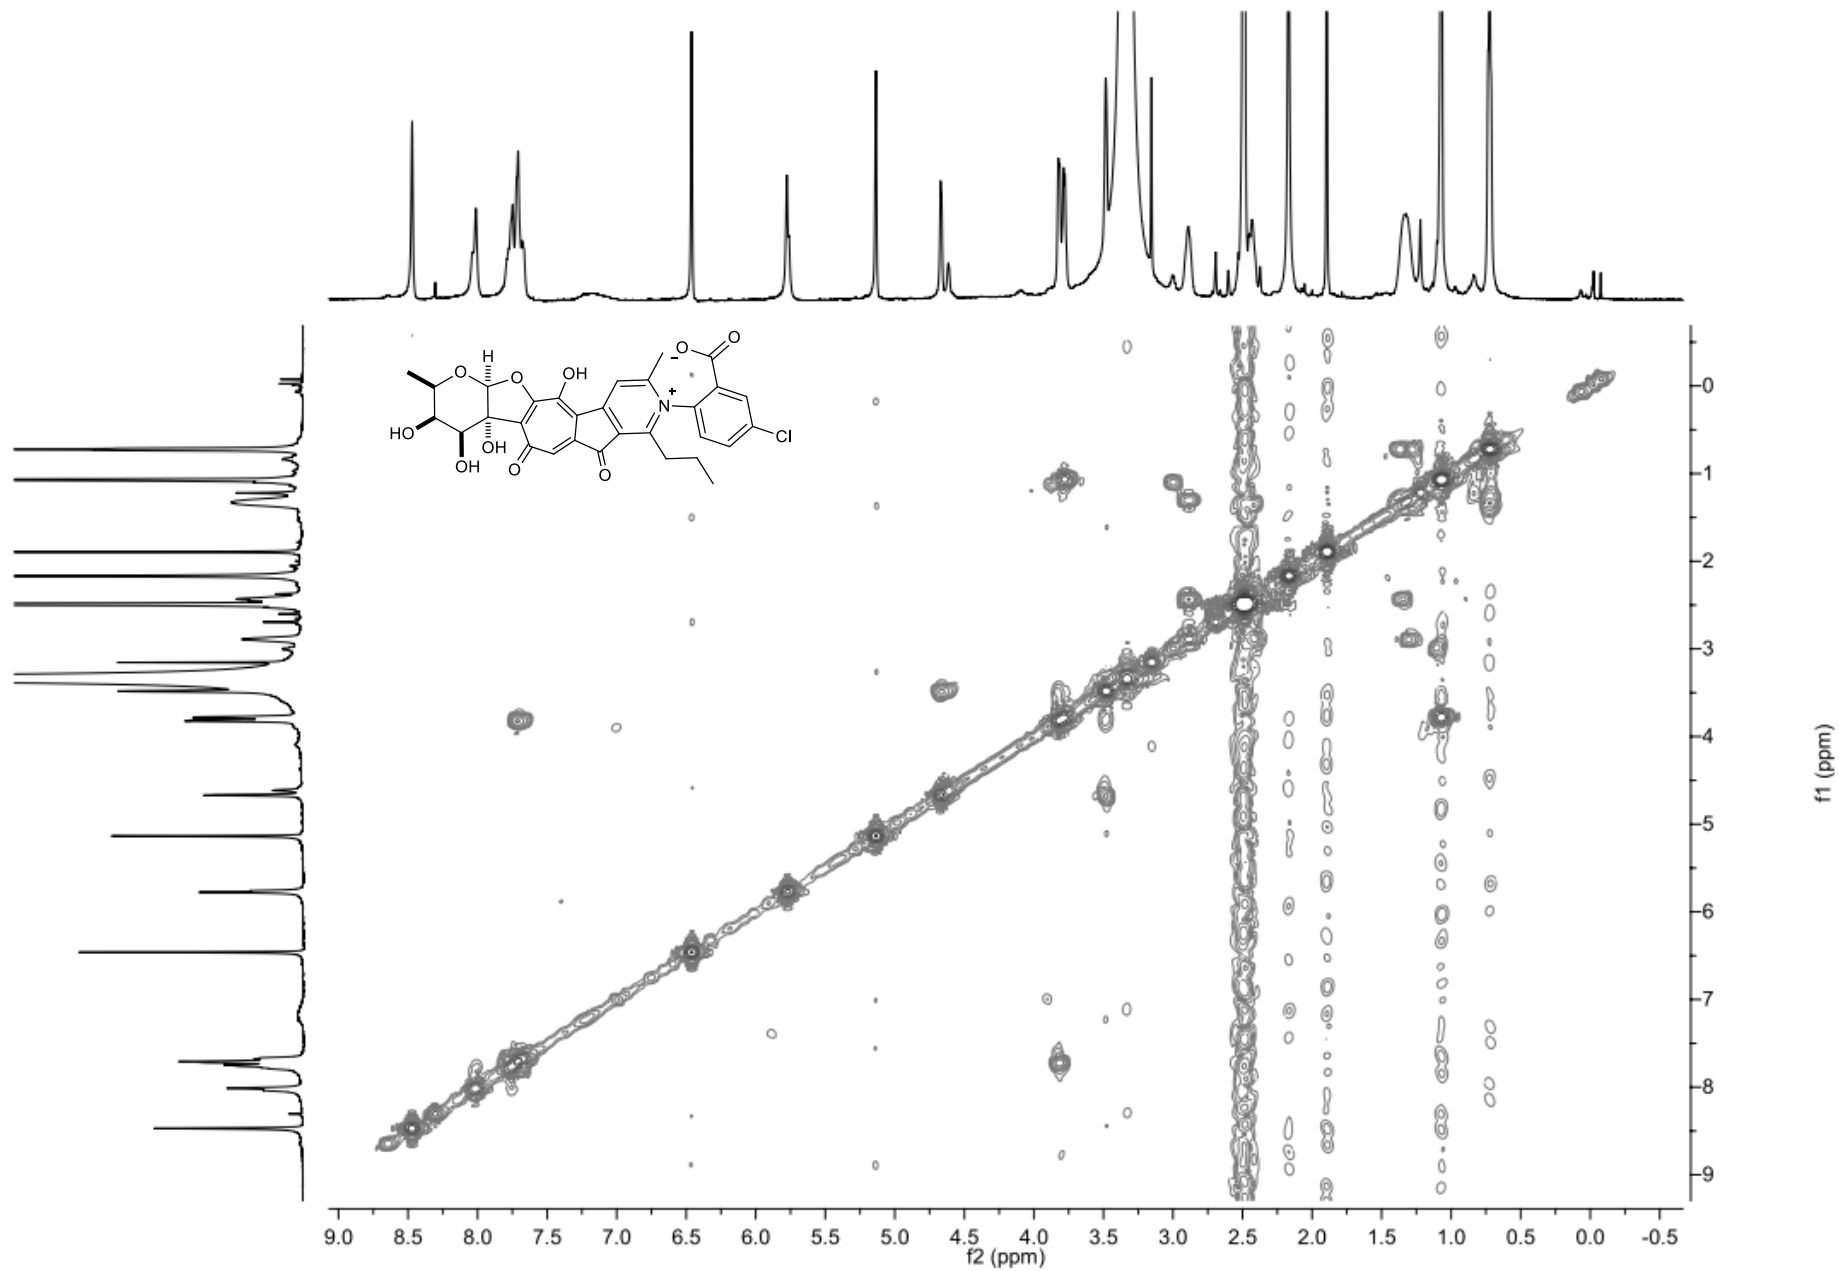

**Supplementary Figure 68.**  $^1\text{H}$ - $^1\text{H}$  COSY NMR spectrum of compound **11** in  $\text{DMSO-}d_6$ .

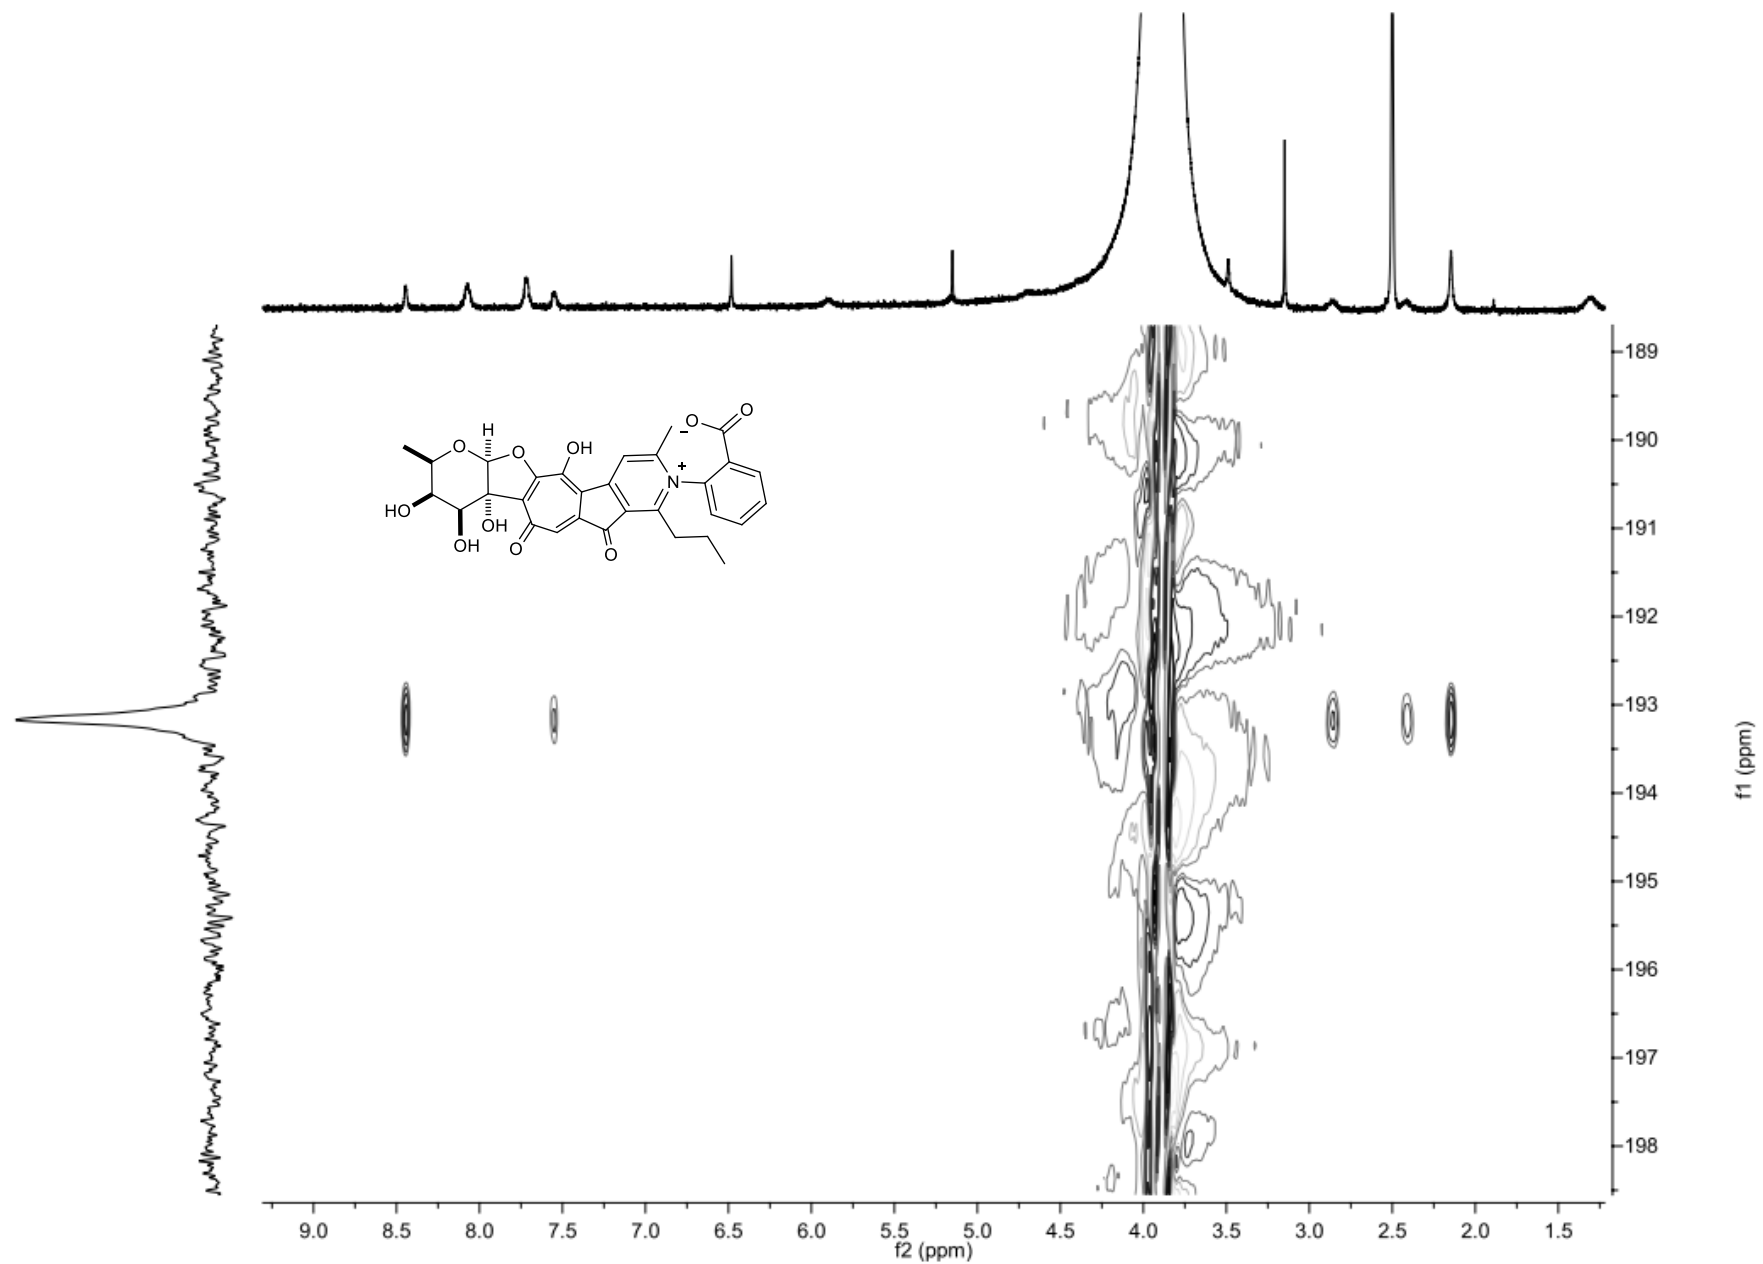

**Supplementary Figure 69.** Enlarged  $^1\text{H}$ - $^{15}\text{N}$  long range correlations NMR spectrum of  $^{15}\text{N}$ -labeled **2** in  $\text{DMSO-}d_6$

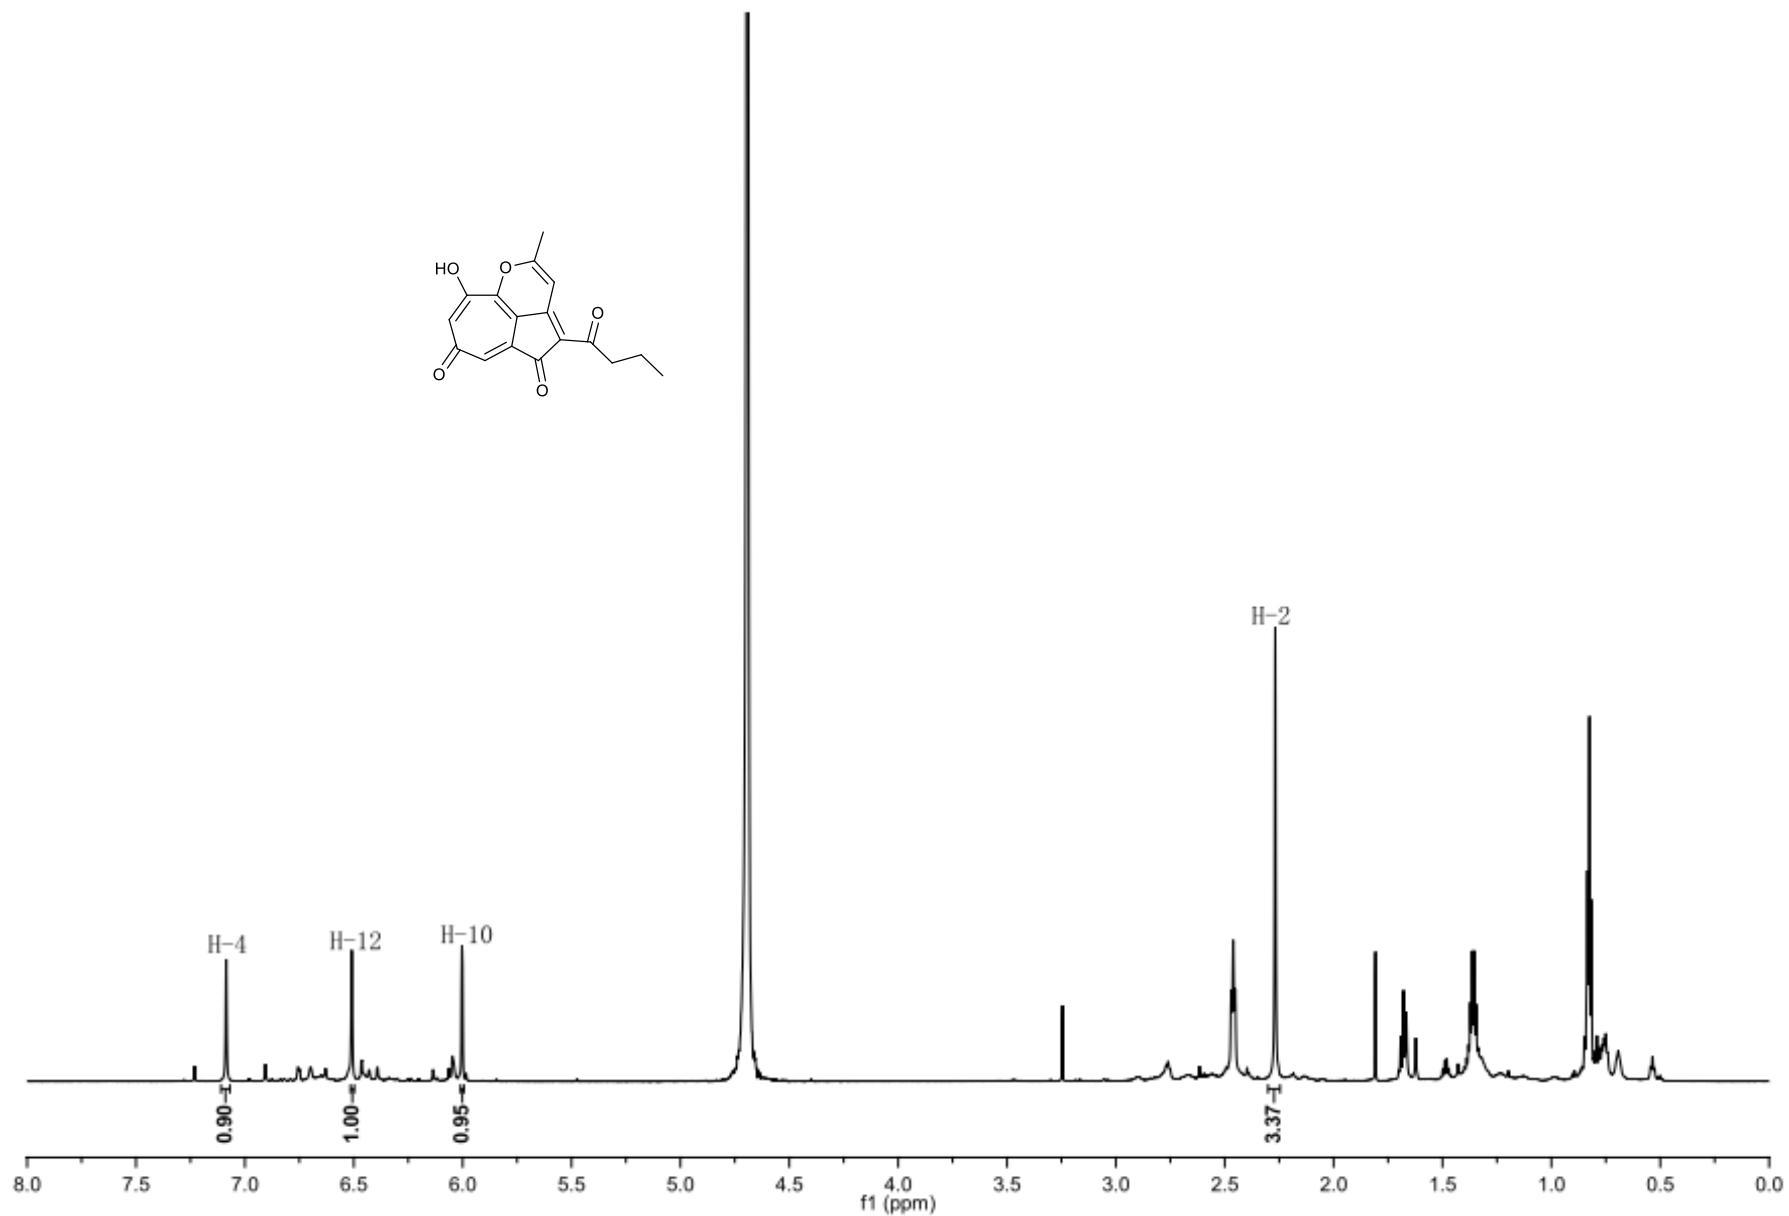

**Supplementary Figure 70.** <sup>1</sup>H NMR spectrum of compound 4 in D<sub>2</sub>O after 5 minutes incubation.

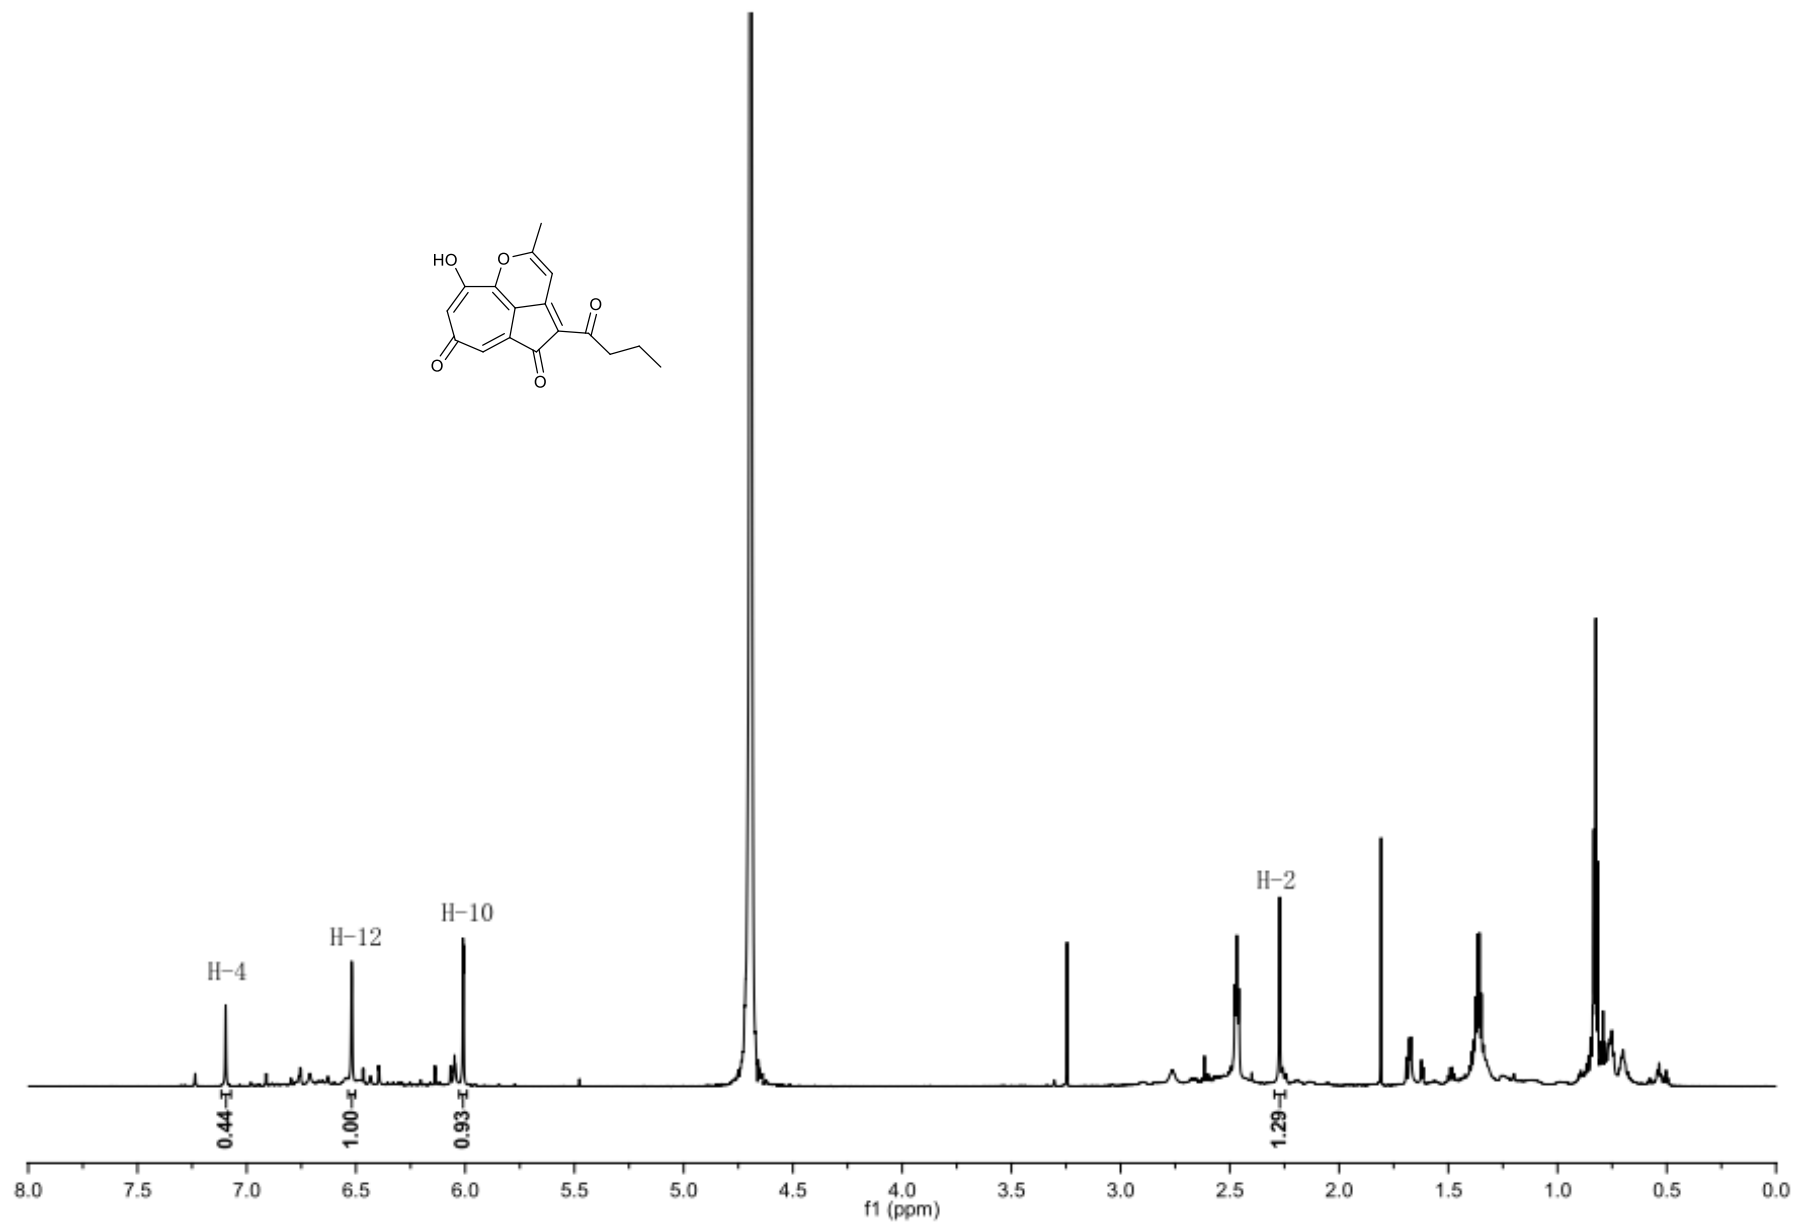

**Supplementary Figure 71.** <sup>1</sup>H NMR spectrum of compound 4 in D<sub>2</sub>O after 2 hours incubation.

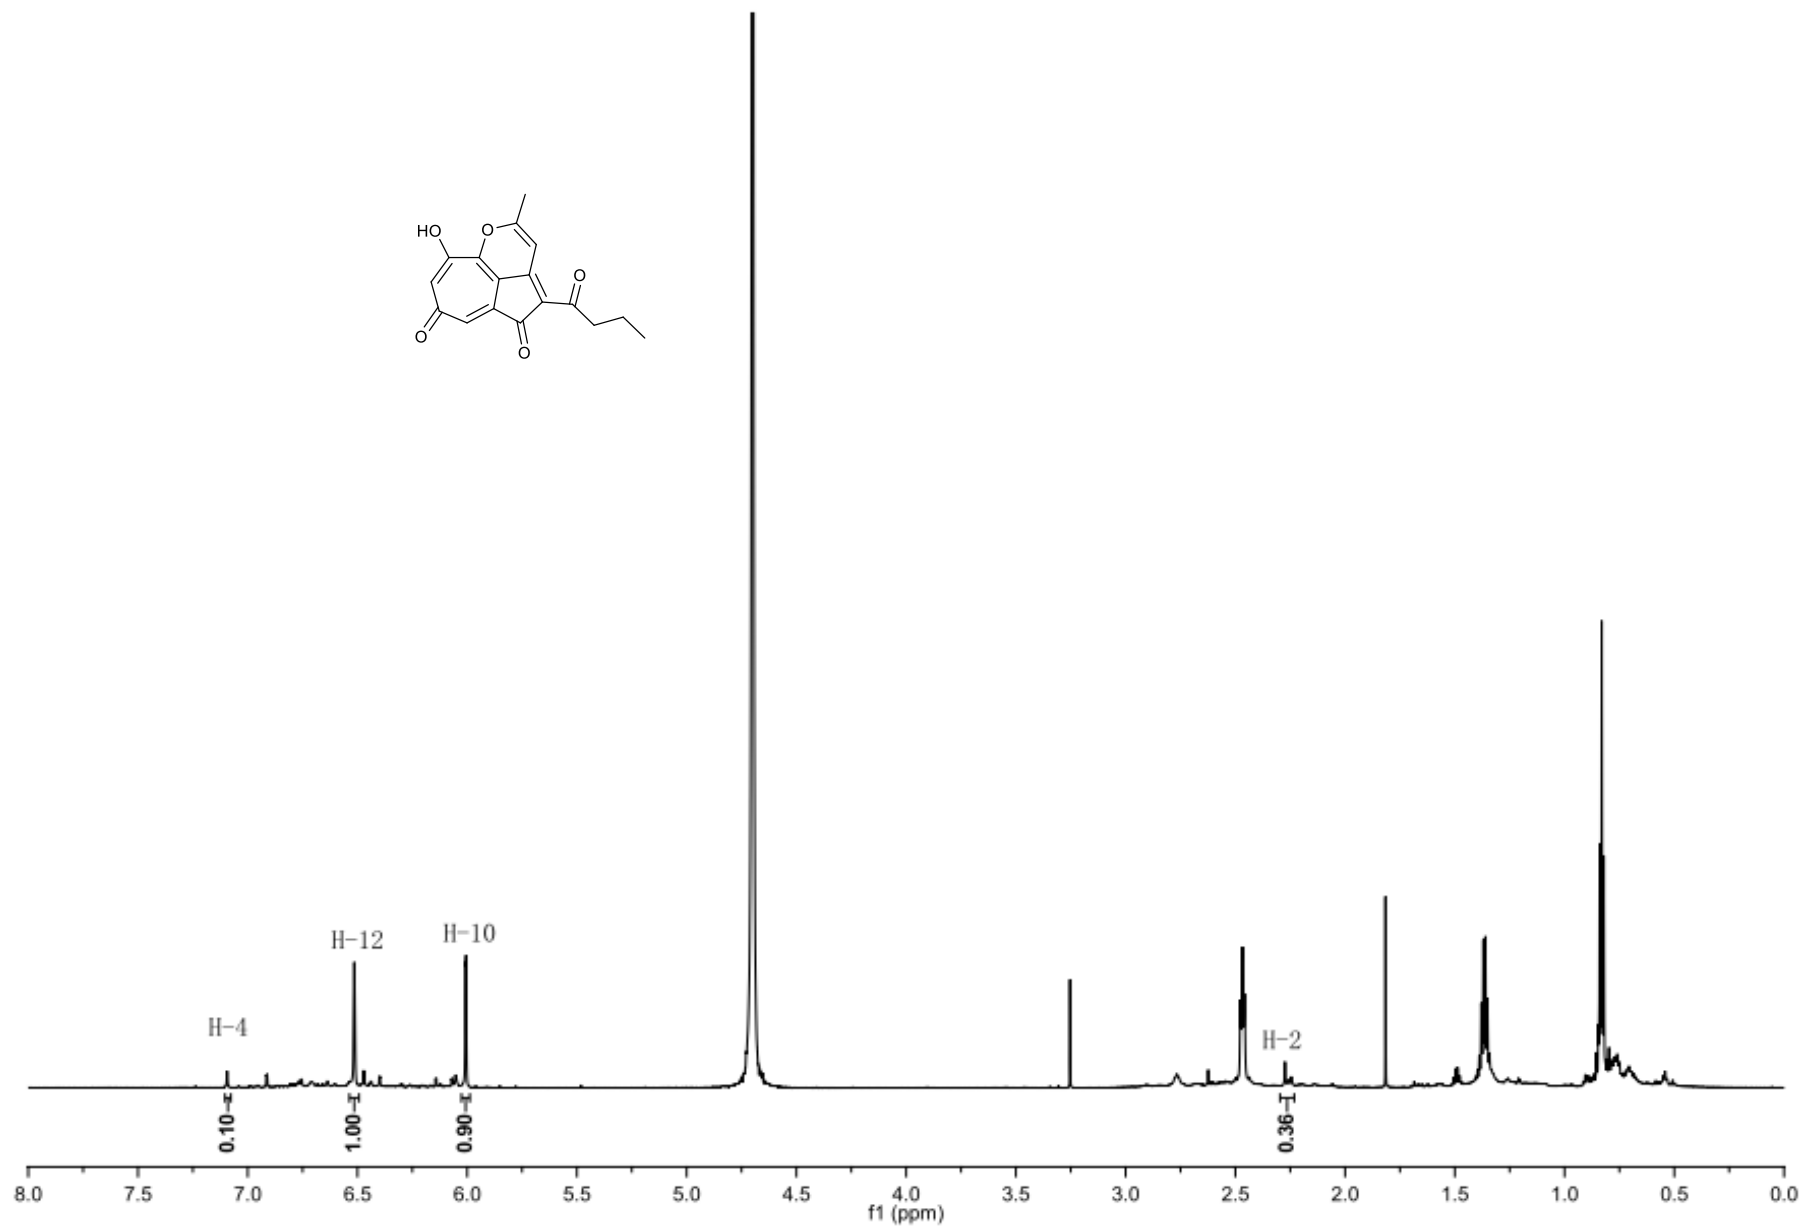

Supplementary Figure 72. <sup>1</sup>H NMR spectrum of compound 4 in D<sub>2</sub>O after 4 hours incubation.



## Supplementary Tables

**Supplementary Table 1.** Deduced roles of genes in *rub* gene cluster based on sequence homology.

| Protein | Size (aa) | Category             | Function                                    | Closest sequence similarity                   |                      |               |
|---------|-----------|----------------------|---------------------------------------------|-----------------------------------------------|----------------------|---------------|
|         |           |                      |                                             | Protein, Origin                               | Positives/Identities | Accession No. |
| RubS1   | 492       | sugar                | FAD-linked oxidoreductase                   | AknOx, <i>Streptomyces galilaeus</i>          | 65/52                | Q0PCD7        |
| RubN1   | 135       | hypothetical protein | Unknown                                     | Sgcj, <i>Streptomyces carzinostaticus</i>     | 56/43                | 4OVM          |
| RubS2   | 204       | sugar                | dTDP-4-keto-6-deoxy-D-glucose 3,5-epimerase | StrM, <i>Streptomyces griseus</i>             | 63/46                | P29783        |
| RubS3   | 310       | sugar                | dTDP-glucose-4-ketoreductase                | NovS, <i>Streptomyces niveus</i>              | 56/44                | Q9L9E9        |
| RubS4   | 343       | sugar                | dTDP-glucose 4,6 dehydratase                | NovT, <i>Streptomyces niveus</i>              | 75/63                | Q9L9E8        |
| RubS5   | 289       | sugar                | Glucose-1-phosphate thymidyltransferase     | RfbA, <i>Shigella flexneri</i>                | 75/58                | P37779        |
| RubS6   | 278       | sugar                | NAD dependent epimerase/dehydratase         | AzoB, <i>Xenophilus azovorans</i>             | 45/29                | Q8KU07        |
| RubS7   | 384       | sugar                | Glycosyltransferase                         | ElmGT, <i>Streptomyces olivaceus</i>          | 48/36                | Q9F2F9        |
| RubR    | 345       | regulation           | SARP family transcriptional regulator       | Dnrl, <i>Streptomyces peucetius</i>           | 54/39                | P25047        |
| RubN2   | 115       | hypothetical protein | Unknown                                     | AcrR, <i>Sciscionella marina</i>              | 69/51                | WP_020501920  |
| RubA    | 311       | oxygenase            | F420-dependent oxidoreductase               | SsuD, <i>Amycolatopsis methanolica</i> 239    | 79/68                | AIJ25240      |
| RubB    | 518       | oxygenase            | Oxygenase                                   | ZhuM, <i>Streptomyces</i> sp. R1128           | 67/55                | AAG30200.1    |
| RubC    | 389       | oxygenase            | naphthocyclinone hydroxylase                | ActVA 5, <i>Streptomyces coelicolor</i> A3(2) | 59/45                | CAA41641      |
| RubE1   | 319       | PKS                  | $\beta$ -ketoacylsynthase III (KSIII)       | ZhuH, <i>Streptomyces</i> sp. R1128           | 78/61                | AAG30194.1    |
| RubE2   | 91        | PKS                  | Acyl carrier protein (ACP)                  | ZhuG, <i>Streptomyces</i> sp. R1128           | 73/53                | AAG30194.1    |
| RubE3   | 306       | PKS                  | Acyl transferase (AT)                       | ZhuC, <i>Streptomyces</i> sp. R1128           | 67/56                | AAG30190.1    |
| RubE4   | 84        | PKS                  | Acyl carrier protein (ACP)                  | ZhuN, <i>Streptomyces</i> sp. R1128           | 82/68                | AAG30201.1    |
| RubE5   | 164       | PKS                  | Bifunctional cyclase/dehydratase            | ZhuJ, <i>Streptomyces</i> sp. R1128           | 76/69                | AAG30197.1    |
| RubE6   | 251       | PKS                  | Cyclase                                     | ZhuI, <i>Streptomyces</i> sp. R1128           | 88/79                | AAG30196.1    |
| RubE7   | 206       | PKS                  | NADH dehydrogenase                          | McyH1, <i>Streptomyces flaveolus</i>          | 80/69                | AFG19428      |
| RubE8   | 409       | PKS                  | $\beta$ -ketoacylsynthase II (KS $\alpha$ ) | ZhuB, <i>Streptomyces</i> sp. R1128           | 88/79                | AAG30189.1    |
| RubE9   | 400       | PKS                  | Chain length factor (CLF/KS $\beta$ )       | ZhuA, <i>Streptomyces</i> sp. R1128           | 81/71                | AAG30188.1    |

**Supplementary Table 2.** NMR data of **3** and **4** in DMSO-*d*<sub>6</sub>, and **5** in CD<sub>3</sub>OD ( $\delta$  in ppm, *J* in Hz).

| No. | <b>3</b>            |                     | <b>4</b>            |        |              | <b>5</b>            |                     |
|-----|---------------------|---------------------|---------------------|--------|--------------|---------------------|---------------------|
|     | $\delta_{\text{H}}$ | $\delta_{\text{C}}$ | $\delta_{\text{H}}$ | COSY   | HMBC         | $\delta_{\text{C}}$ | $\delta_{\text{H}}$ |
| 2   | 2.55 (s)            | 20.82               | 2.46 (s)            |        | 4, 3         | 125.42              | 6.89 (s)            |
| 3   |                     | 169.33              |                     |        |              | 163.49              |                     |
| 4   | 8.12 (s)            | 106.34              | 7.61 (s)            |        | 6, 3, 2      | 113.71              | 7.42 (s)            |
| 5   |                     | 161.41              |                     |        |              | 139.00              |                     |
| 6   |                     | 122.14              |                     |        |              | 184.54              |                     |
| 7   |                     | 133.84              |                     |        |              | 136.11              |                     |
| 8   |                     | 150.12              |                     |        |              | 108.40              | 7.03 (s)            |
| 9   |                     | nd                  |                     |        |              | 165.73              |                     |
| 10  | 6.50 (s)            | 119.54              | 6.48 (brs)          | 12     | 12, 8        | 109.53              | 6.48 (s)            |
| 11  |                     | nd                  |                     |        |              | 166.55              |                     |
| 12  | 6.69 (s)            | 126.62              | 7.07 (brs)          | 10     | 13, 10, 7, 6 | 111.94              |                     |
| 13  |                     | 186.39              |                     |        |              | 189.72              |                     |
| 14  |                     | 115.07              |                     |        |              | 124.01              |                     |
| 15  |                     | 195.96              |                     |        |              | 151.51              |                     |
| 16  | 3.03 (t, 7.1)       | 43.20               | 2.81 (t, 7.2)       | 17     | 18, 17, 15   | 39.36               | 3.09 (t, 7.6)       |
| 17  | 1.65 (m)            | 16.96               | 1.53 (m)            | 18, 16 | 18, 16, 15   | 25.42               | 1.60 (m)            |
| 18  | 0.93 (t, 7.3)       | 13.80               | 0.89 (t, 7.4)       | 17     | 17, 16       | 14.86               | 0.99 (t, 7.3)       |

<sup>a</sup>nd means not detected in the NMR spectra.

**Supplementary Table 3.** NMR data of **6** in CD<sub>3</sub>OD and **7-8** in DMSO-*d*<sub>6</sub> ( $\delta$  in ppm, *J* in Hz).

| No.   | <b>6</b>   |               |        |                      | <b>7</b>   |                                               |        |                    | <b>8</b>   |                       |        |                   |
|-------|------------|---------------|--------|----------------------|------------|-----------------------------------------------|--------|--------------------|------------|-----------------------|--------|-------------------|
|       | $\delta_C$ | $\delta_H$    | COSY   | HMBC                 | $\delta_C$ | $\delta_H$                                    | COSY   | HMBC               | $\delta_C$ | $\delta_H$            | COSY   | HMBC              |
| 1     | 171.86     |               |        |                      |            |                                               |        |                    |            |                       |        |                   |
| 2     | 132.77     |               |        |                      | 51.91      | 2.12 (dd,13.6, 1.7),<br>2.80 (overlapped)     | 4      | 16, 15, 14, 4, 3   | 22.77      | 2.17 (s)              |        |                   |
| 3     | 159.72     |               |        |                      | 207.86     |                                               |        |                    | 157.73     |                       |        |                   |
| 4     | 113.41     | 7.50 (s)      |        | 14,13, 6, 5, 3, 2, 1 | 55.29      | 2.36 (dd,13.0, 1.6),<br>2.79 (overlapped)     | 2      | 14, 6, 5, 3, 2     | 116.31     | 8.51 (s)              |        |                   |
| 5     | 138.25     |               |        |                      | 74.25      |                                               |        |                    | 161.61     |                       |        |                   |
| 6     | 183.76     |               |        |                      | 40.04      | 2.52 (overlapped)<br>3.30 (d, 16.5),          |        | 14, 12, 8, 7, 5, 4 | 107.54     |                       |        |                   |
| 7     | 135.60     |               |        |                      | 146.23     |                                               |        |                    | 137.69     |                       |        |                   |
| 8     | 108.22     | 6.98 (d, 1.9) | 10     | 13, 12, 10, 7, 6     | 107.98     | 6.08 (brs)                                    | 10     | 12, 10, 6          | 170.87     |                       |        |                   |
| 9     | 166.36     |               |        |                      | 164.59     |                                               |        |                    | 161.22     |                       |        |                   |
| 10    | 109.49     | 6.45 (d, 1.9) | 8      | 12, 9, 8             | 99.91      | 6.02 (d, 1.9)                                 | 8      | 9, 8               | 114.45     | 6.36 (s)              |        | 12, 11, 9, 8      |
| 11    | 165.42     |               |        |                      | 164.60     |                                               |        |                    | 185.74     |                       |        |                   |
| 12    | 111.97     |               |        |                      | 111.35     |                                               |        |                    | 118.51     | 6.46 (s)              |        | 13, 10, 6         |
| 13    | 189.33     |               |        |                      | 203.21     |                                               |        |                    | 192.57     |                       |        |                   |
| 14    | 123.85     |               |        |                      | 59.65      |                                               |        |                    | 121.32     |                       |        |                   |
| 15    | 147.15     |               |        |                      | 75.95      |                                               |        |                    | 154.82     |                       |        |                   |
| 16    | 35.86      | 3.18 (t, 7.6) | 17     | 18, 17, 15, 14, 2    | 43.97      | 1.40 (td, 3.7, 13.0),<br>1.63 (td, 4.3, 13.0) | 17     | 18, 17, 15, 14, 2, | 30.57      | 2.82 (m),<br>2.49 (m) | 17     | 18, 17, 15,<br>14 |
| 17    | 25.32      | 1.63 (m)      | 18, 16 | 18, 16, 15           | 17.40      | 1.26 (m), 1.52 (m)                            | 18, 16 | 18, 16             | 21.66      | 1.32 (m)              | 18, 16 | 18, 16, 15        |
| 18    | 15.13      | 1.07 (t, 7.3) | 17     | 17, 16               | 14.60      | 0.86 (t, 7.2)                                 | 17     | 17, 16             | 13.99      | 0.71 (t, 6.9)         | 17     | 17, 16            |
| 1'    |            |               |        |                      |            |                                               |        |                    | 129.02     |                       |        |                   |
| 2'    |            |               |        |                      |            |                                               |        |                    | 136.30     |                       |        |                   |
| 3'    |            |               |        |                      |            |                                               |        |                    | 129.03     | 7.77                  | 4'     |                   |
| 4'    |            |               |        |                      |            |                                               |        |                    | 133.80     | 7.91                  | 3'     |                   |
| 5'    |            |               |        |                      |            |                                               |        |                    | 131.53     | 7.82                  | 6'     | 1'                |
| 6'    |            |               |        |                      |            |                                               |        |                    | 132.30     | 8.21                  | 5'     | 2', 7'            |
| 7'    |            |               |        |                      |            |                                               |        |                    | 165.21     |                       |        |                   |
| OH-5  |            |               |        |                      |            | 5.29 (brs)                                    |        | 14, 6, 5           |            |                       |        |                   |
| OH-11 |            |               |        |                      |            | 12.89 (s)                                     |        | 13, 12, 11, 10     |            |                       |        |                   |
| OH-15 |            |               |        |                      |            | 4.81 (s)                                      |        | 15, 14, 2          |            |                       |        |                   |

**Supplementary Table 4.** NMR data of compounds **10** and **11** in DMSO-*d*<sub>6</sub> ( $\delta$  in ppm, *J* in Hz).

| No.   | <b>10</b>  |                      |            |                  | <b>11</b>         |            |                      |                  |             |
|-------|------------|----------------------|------------|------------------|-------------------|------------|----------------------|------------------|-------------|
|       | $\delta_C$ | $\delta_H$           | $\delta_F$ | HMBC             | COSY              | $\delta_C$ | $\delta_H$           | HMBC             | COSY        |
| 2     | 22.75      | 2.17 (s)             |            | 4, 3             |                   | 22.87      | 2.17 (s)             | 4, 3             |             |
| 3     | 158.46     |                      |            |                  |                   | 158.57     |                      |                  |             |
| 4     | 115.90     | 8.50 (s)             |            | 14, 3, 2         |                   | 115.90     | 8.47 (s)             | 14, 3, 2         |             |
| 5     | 161.53     |                      |            |                  |                   | 161.53     |                      |                  |             |
| 6     | 111.41     |                      |            |                  |                   | 111.45     |                      |                  |             |
| 7     | 137.69     |                      |            |                  |                   | 137.69     |                      |                  |             |
| 8     | 170.02     |                      |            |                  |                   | 169.83     |                      |                  |             |
| 9     | 165.39     |                      |            |                  |                   | 165.53     |                      |                  |             |
| 10    | 130.07     |                      |            |                  |                   | 130.08     |                      |                  |             |
| 11    | 183.56     |                      |            |                  |                   | 183.49     |                      |                  |             |
| 12    | 117.27     | 6.47 (s)             |            | 13, 11, 10, 7, 6 |                   | 117.00     | 6.46 (s)             | 13, 11, 10, 7, 6 |             |
| 13    | 192.79     |                      |            |                  |                   | 192.98     |                      |                  |             |
| 14    | 120.88     |                      |            |                  |                   | 120.82     |                      |                  |             |
| 15    | 154.70     |                      |            |                  |                   | 154.83     |                      |                  |             |
| 16    | 30.38      | 2.48 (m)<br>2.84 (m) |            | 18, 17, 14       | H-17              | 30.51      | 2.48 (m)<br>2.89 (m) |                  | H-17        |
| 17    | 21.67      | 1.30 (m)             |            | 18, 16           | H-18, H-16        | 21.59      | 1.33 (m)             |                  | H-18, H-16  |
| 18    | 13.88      | 0.73 (t, 7.1)        |            | 17, 16           | H-17              | 13.97      | 0.72 (t, 6.1)        | 17, 16           | H-17        |
| 19    | 104.55     | 5.14 (s)             |            | 20, 10, 9        |                   | 104.55     | 5.13 (s)             | 20, 10, 9        |             |
| 20    | 83.11      |                      |            |                  |                   | 83.09      |                      |                  |             |
| 21    | 74.07      | 3.82 (brs)           |            | 20, 10           | H-22, OH-21       | 74.10      | 3.82 (brs)           | 20, 10           | H-22, OH-21 |
| 22    | 70.31      | 3.49 (brs)           |            | 24, 21, 20       | H-23, OH-22, H-21 | 70.35      | 3.48 (brs)           |                  | OH-22, H-21 |
| 23    | 70.26      | 3.78 (m)             |            | 24, 22, 21, 19   | H-24, H-22        | 70.23      | 3.78 (m)             |                  | H-24, H-22  |
| 24    | 16.69      | 1.07 (d, 6.2)        |            | 23, 22           | H-23              | 16.69      | 1.07 (d, 5.9)        | 23, 22           | H-23        |
| 1'    | 129.79     |                      |            |                  |                   | 128.31     |                      |                  |             |
| 2'    | 132.45     |                      |            |                  |                   | 134.44     |                      |                  |             |
| 3'    | 131.58     | 7.91 (m)             |            | 5', 1'           | H-4'              | 129.97     | 7.71 (m)             | 5'               | H-4'        |
| 4'    | 120.44     | 7.77 (m)             |            | 6', 2'           | H-3'              | 131.23     | 8.01 (m)             | 2'               | H-3'        |
| 5'    | 162.39     |                      | -108.22    |                  |                   | 135.19     |                      |                  |             |
| 6'    | 118.82     | 7.94 (m)             |            | 4', 2'           |                   | 130.75     | 7.75 (m)             | 4', 2'           |             |
| 7'    | 164.06     |                      |            |                  |                   | 165.43     |                      |                  |             |
| OH-20 |            | 5.77 (s)             |            |                  |                   |            | 5.78 (s)             | 19               |             |
| OH-21 |            | 7.66 (brs)           |            |                  | H-21              |            | 7.68 (brs)           | 21, 20           | H-21        |
| OH-22 |            | 4.69 (s)             |            |                  | H-22              |            | 4.67 (s)             | 23               | H-22        |

**Supplementary Table 5.** Strains and plasmids used and generated in this study.

| Strains/Plasmid                  | Purpose                                                                                                          | Sources                          |
|----------------------------------|------------------------------------------------------------------------------------------------------------------|----------------------------------|
| <b>Strains</b>                   |                                                                                                                  |                                  |
| <i>E. coli</i>                   |                                                                                                                  |                                  |
| DH10B                            | Host strain for cloning                                                                                          | Invitrogen                       |
| BW25113/pIJ790                   | Host strain for PCR targeting                                                                                    | Ref. 10                          |
| ET12567/pUZ8002                  | Donor strain for conjugation                                                                                     | Ref. 11                          |
| XL1-blue MR                      | Host strain for genomic library                                                                                  | Agilent Technologies             |
| DH5a/BT340                       | Host strain for in-frame deletion                                                                                | Ref. 12                          |
| <b><i>Streptomyces</i></b>       |                                                                                                                  |                                  |
| <i>Streptomyces</i> sp. KIB-H033 | Rubrolones wild type producing strain                                                                            | This study                       |
| <i>Streptomyces albus</i> J1074  | Host strain for heterologous expression                                                                          | Ref. 13                          |
| <i>S. albus</i> 9B10             | <i>Streptomyces albus</i> J1074 integrated with plasmid 9B10 which contains <i>rub</i> biosynthetic gene cluster | This study                       |
| <i>S. albus</i> 9B10-1           | <i>orf1-orf7</i> inactivation mutant of <i>S. albus</i> 9B10                                                     | This study                       |
| <i>S. albus</i> 9B10-2           | <i>orf30-orf37</i> inactivation mutant of <i>S. albus</i> 9B10                                                   | This study                       |
| <i>S. albus</i> 9B10-Δ <i>S1</i> | <i>rubS1</i> inactivation mutant of <i>S. albus</i> 9B10                                                         | This study                       |
| <i>S. albus</i> 9B10-Δ <i>S2</i> | <i>rubS2</i> inactivation mutant of <i>S. albus</i> 9B10                                                         | This study                       |
| <i>S. albus</i> 9B10-Δ <i>S3</i> | <i>rubS3</i> inactivation mutant of <i>S. albus</i> 9B10                                                         | This study                       |
| <i>S. albus</i> 9B10-Δ <i>S7</i> | <i>rubS7</i> inactivation mutant of <i>S. albus</i> 9B10                                                         | This study                       |
| <i>S. albus</i> 9B10-Δ <i>A</i>  | <i>rubA</i> inactivation mutant of <i>S. albus</i> 9B10                                                          | This study                       |
| <i>S. albus</i> 9B10-Δ <i>B</i>  | <i>rubB</i> inactivation mutant of <i>S. albus</i> 9B10                                                          | This study                       |
| <i>S. albus</i> 9B10-Δ <i>C</i>  | <i>rubC</i> inactivation mutant of <i>S. albus</i> 9B10                                                          | This study                       |
| <i>S. albus</i> 9B10-Δ <i>E7</i> | <i>rubE7</i> inactivation mutant of <i>S. albus</i> 9B10                                                         | This study                       |
| <i>S. albus</i> 9B10-Δ <i>E9</i> | <i>rubE9</i> inactivation mutant of <i>S. albus</i> 9B10                                                         | This study                       |
| <b>Plasmids</b>                  |                                                                                                                  |                                  |
| pJTU2554                         | Apr <sup>r</sup> , Cosmid vector for genomic library construction                                                | Ref. 10                          |
| pJTU6722                         | Ery <sup>r</sup> , Vector for PCR targeting                                                                      | Constructed by Prof. Meifeng Tao |
| p9B10                            | Apr <sup>r</sup> , Cosmid which contains <i>rub</i> biosynthetic gene cluster                                    | This study                       |
| p9B10-1                          | Apr <sup>r</sup> , gene inactivation clone used for <i>orf1-orf7</i> mutant                                      | This study                       |
| p9B10-2                          | Apr <sup>r</sup> , gene inactivation clone used for <i>orf30-orf37</i> mutant                                    | This study                       |
| p9B10-Δ <i>S1</i>                | Apr <sup>r</sup> , gene inactivation clone used for <i>rubS1</i> mutant                                          | This study                       |
| p9B10-Δ <i>S2</i>                | Apr <sup>r</sup> , gene inactivation clone used for <i>rubS2</i> mutant                                          | This study                       |
| p9B10-Δ <i>S3</i>                | Apr <sup>r</sup> , gene inactivation clone used for <i>rubS3</i> mutant                                          | This study                       |
| p9B10-Δ <i>S7</i>                | Apr <sup>r</sup> , gene inactivation clone used for <i>rubS7</i> mutant                                          | This study                       |
| p9B10-Δ <i>A</i>                 | Apr <sup>r</sup> , gene inactivation clone used for <i>rubA</i> mutant                                           | This study                       |
| p9B10-Δ <i>B</i>                 | Apr <sup>r</sup> , gene inactivation clone used for <i>rubB</i> mutant                                           | This study                       |
| p9B10-Δ <i>C</i>                 | Apr <sup>r</sup> , gene inactivation clone used for <i>rubC</i> mutant                                           | This study                       |
| p9B10-Δ <i>E7</i>                | Apr <sup>r</sup> , gene inactivation clone used for <i>rubE7</i> mutant                                          | This study                       |
| p9B10-Δ <i>E9</i>                | Apr <sup>r</sup> , gene inactivation clone used for <i>rubE9</i> mutant                                          | This study                       |

**Supplementary Table 6.** Primers used for constructing and confirming the mutants.

| Primers             | Targeted genes     | Sequences                                                          |
|---------------------|--------------------|--------------------------------------------------------------------|
| For PCR targeting   |                    |                                                                    |
| Tar-H2517-F         | <i>orf1-orf7</i>   | 5'-CTCCGACGCCGTGCGGTGAAATCTTTTCAGGAGGAAGTCCattccggggatccgctgacc-3' |
| Tar-H2511-R         |                    | 5'-GTGCACCCGCAACAGCGAGTACTGGATCCTGCGCACCGGtgtaggctggagctgcttc-3'   |
| Tar-H2518-F         | <i>rubS1</i>       | 5'-ACCGTCCGCCCCGGCGACCCGCGCTACGACGACCTGGCGattccggggatccgctgacc-3'  |
| Tar-H2518-R         |                    | 5'-CCGCGCTCTCGATCTCCGTGCGGGCGGCATCGGTGCTCGtgtaggctggagctgcttc-3'   |
| Tar-H2549-F         | <i>orf30-orf37</i> | 5'-CCGGCACCCTCGCGGGCGGCATCTTCGCGGTCCGGCACCCattccggggatccgctgacc-3' |
| Tar-H2542-R         |                    | 5'-TTCGGTTCCGACCGAGGCAGGACAGCGGGCCGGTCCCGtgtaggctggagctgcttc-3'    |
| Tar-H2541-F         | <i>rubE9</i>       | 5'-CCGATGAGGCCGCCCGCAGTCGTACCCGGGATCGGGGTGattccggggatccgctgacc-3'  |
| Tar-H2541-R         |                    | 5'-GGGTCCCCTTCGGTTCCGACCGAGGGCGGGGGTCAtgtaggctggagctgcttc-3'       |
| Tar-H2539-F         | <i>rubE7</i>       | 5'-GCAACGACGGCCGGCACGGCTCCTGGCGCTGGACGCGGCCattccggggatccgctgacc-3' |
| Tar-H2539-R         |                    | 5'-AGCGCAAACCCGTGCACGAGGTGCCCCAGGCGGAGGTCAtgtaggctggagctgcttc-3'   |
| Tar-H2528-F         | <i>rubA</i>        | 5'-CTGCGCAAACCGATCTCTGAAATGGGGTGTGGGCAATGattccggggatccgctgacc-3'   |
| Tar-H2528-R         |                    | 5'-GCCCGGGCCCGCGGGTCCGGGCACCCGGCCCGCGGTCAtgtaggctggagctgcttc-3'    |
| Tar-H2530-F         | <i>rubB</i>        | 5'-ACCCGCGTCGGCTGCCGTGCCGATGGGAGTGGGAGATGattccggggatccgctgacc-3'   |
| Tar-H2530-R         |                    | 5'-GGTCACCACGTCGACGCGTCCGGCCAGCCGCGCGCCGTtgtaggctggagctgcttc-3'    |
| Tar-H2531-F         | <i>rubC</i>        | 5'-CCGAAGGAGACTGATGTGACGCACCCAGTAGCCCGCGGattccggggatccgctgacc-3'   |
| Tar-H2531-R         |                    | 5'-TGCCGGGGACGGCAGGGCGGGCGGGTGCACGGGTCAtgtaggctggagctgcttc-3'      |
| Tar-H2520-F         | <i>rubS2</i>       | 5'-ACAACGTGCGGCCGCGCTCGCCCCGGAGCCGAAGACCattccggggatccgctgacc-3'    |
| Tar-H2520-R         |                    | 5'-GCGGCCGGCACGGCGGACGGGCGCCGGGGGGCGGTGTGCGtgtaggctggagctgcttc-3'  |
| Tar-H2521-F         | <i>rubS3</i>       | 5'-GCCACAGGGCGAGGTCCGCGTCGGAGGGGCCGCTGTCCGattccggggatccgctgacc-3'  |
| Tar-H2521-R         |                    | 5'-GGCAGTCGGCGGTGCGGTCACCGCCCCGGCCCGGGGGCGtgtaggctggagctgcttc-3'   |
| Tar-H2525-F         | <i>rubS7</i>       | 5'-ATTGCCGACTCCTCGACAAAGGGCGTATGCGCAGCCATGattccggggatccgctgacc-3'  |
| Tar-H2525-R         |                    | 5'-CTCCGCGGTCAGTTGTCTCCTGTCCGGCGGCGACACCAGtgtaggctggagctgcttc-3'   |
|                     |                    |                                                                    |
| For gene validation |                    |                                                                    |
| H2518-check-F       | <i>rubS1</i>       | 5'-GTGAGTGTTCCCTTGAGCAA-3'                                         |
| H2518-check-R       |                    | 5'-GAACCTTGC GGATGTCCTC-3'                                         |
| H2541-check-F       | <i>rubE9</i>       | 5'-CAACCTGCACGAACCGGATC-3'                                         |
| H2541-check-R       |                    | 5'-AGCACATGACGAAGGGCCTG-3'                                         |
| H2539-check-F       | <i>rubE7</i>       | 5'-TGCGCGAGATGGTTCGAGGAGTA-3'                                      |
| H2539-check-R       |                    | 5'-CGGAAGTCAGCAGGTCCACGAAT-3'                                      |
| H2528-check-F       | <i>rubA</i>        | 5'-CATGGTTCGATTCTGTCTCTCAT-3'                                      |
| H2528-check-R       |                    | 5'-GCGTTCATCGAGCACTGGAAGT-3'                                       |
| H2530-check-F       | <i>rubB</i>        | 5'-CTGCCTCAGCCATTGCTCAAGA-3'                                       |
| H2530-check-R       |                    | 5'-GGTGCGTCACATCAGTCTCCTTC-3'                                      |
| H2531-check-F       | <i>rubC</i>        | 5'-AGCGTGACCGAAGCGATGCA-3'                                         |
| H2531-check-R       |                    | 5'-AACACCTCAGCGGCGTCGAT-3'                                         |
| H2520-check-F       | <i>rubS2</i>       | 5'-GGACATCCGCAAGTTCAT-3'                                           |
| H2520-check-R       |                    | 5'-CTGCACTACGTCAACACT-3'                                           |
| H2521-check-F       | <i>rubS3</i>       | 5'-GCCTGAAGCTGATCCTGT-3'                                           |
| H2521-check-R       |                    | 5'-GATCGACGACAGGAT-3'                                              |
| H2525-check-F       | <i>rubS7</i>       | 5'-GCGGCTACTTGACGATGTCCTC-3'                                       |
| H2525-check-R       |                    | 5'-GCTACCACGAGTACCTGATGTTCT-3'                                     |

## Supplementary References

1. Dan, C. *et al.* Cimicifugadine from *Cimicifuga foetida*, a new class of triterpene alkaloids with novel reactivity. *Org. Lett.* **9**, 1813-1816 (2007).
2. Baghdikian, B. *et al.* Two new pyridine monoterpene alkaloids by chemical conversion of a commercial extract of *Harpagophytum procumbens*. *J. Nat. Prod.* **62**, 211-213 (1999).
3. Oshimi, S. *et al.* Cassiarins C-E, antiplasmodial alkaloids from the flowers of *Cassia siamea*. *J. Nat. Prod.* **72**, 1899-1901 (2009).
4. Okatani, T., Koyama, J., Tagahara, K. & Suzuta, Y. Synthesis of sesquiterpene alkaloids, guaipyridine: epiguaipyridine and related compounds. *Heterocycles* **26**, 595-597 (1987).
5. Edwards, O. E. & Elmore, N. F. Fabianine. *Can. J. Chem.* **40**, 256-264 (1962).
6. Tasdemir, D. *et al.* Deoxyamphimedine, a new pyridoacridine alkaloid from two tropical *Xestospongia* sponges. *J. Org. Chem.* **66**, 3246-3248 (2001).
7. Rakhmatullaev, T. U. & Yunusov, S. Y. Alkaloids of *Gentiana olivieri*. *Chem. Nat. Compd.* **9**, 56-58 (1973).
8. Cash, B. M., Prevost, N., Wagner, F. F. & Comins, D. L. Studies toward the total synthesis of dihydrolycolucine, preparation of AB and CEF ring fragments. *J. Org. Chem.* **79**, 5740-5745 (2014).
9. Jayasinghe, L., Jayasooriya, C. P., Hara, N. & Fujimoto, Y. A pyridine ring-containing ecdysteroid from *Diploclisia glaucescens*. *Tetrahedron Lett.* **44**, 8769-8771 (2003).
10. Li, L. *et al.* The mildiomycin biosynthesis: initial steps for sequential generation of 5-hydroxymethylcytidine 5'-monophosphate and 5-hydroxymethylcytosine in *Streptovorticillium rimofaciens* ZJU5119. *ChemBioChem* **9**, 1286-1294 (2008).
11. Paget, M. S., Chamberlin, L., Atrih, A., Foster, S. J. & Buttner, M. J. Evidence that the extracytoplasmic function sigma factor sigmaE is required for normal cell wall structure in *Streptomyces coelicolor* A3(2). *J. Bacteriol.* **181**, 204-211 (1999).
12. Datsenko, K. A. & Wanner, B. L. One-step inactivation of chromosomal genes in *Escherichia coli* K-12 using PCR products. *Proc. Natl. Acad. Sci. U.S.A.* **97**, 6640-6645 (2000).
13. Chater, K. F. & Wilde, L. C. *Streptomyces albus* G mutants defective in the SalGI restriction-modification system. *J. Gen. Microbiol.* **116**, 323-334 (1980).
